# Supplementary material for: The thiol-sulfoxonium ylide photo-click reaction for bioconjugation
Source: Chem Sci. 2022 Dec 3;14(3):604–12. doi: 10.1039/d2sc05650j (PMC9847666; doi:10.1039/d2sc05650j)
Supplement: SC-014-D2SC05650J-s001 [file SC-014-D2SC05650J-s001.xlsx]

## Sheet: ModificationSites
3246 modified cysteine sites by 1m from Hela cells
Modification	Position in Peptide	Peptide Sequence	Modified PSMs	Protein Accession	Protein Description	Position	Motif
ylide_biotin	7	KVAWSPCGNYLASASFDATTCIWK	1	O76071	Probable cytosolic iron-sulfur protein assembly protein CIAO1 OS=Homo sapiens OX=9606 GN=CIAO1 PE=1 SV=1	72	KVAWSPcGNYLAS
ylide_biotin	7	NQDDFECVTTLEGHENEVK	3	O76071	Probable cytosolic iron-sulfur protein assembly protein CIAO1 OS=Homo sapiens OX=9606 GN=CIAO1 PE=1 SV=1	97	NQDDFEcVTTLEG
ylide_biotin	12	QYLPGNEQGVACSGSDPSWK	3	O76071	Probable cytosolic iron-sulfur protein assembly protein CIAO1 OS=Homo sapiens OX=9606 GN=CIAO1 PE=1 SV=1	234	NEQGVAcSGSDPS
ylide_biotin	12	ACCISTGGHSQCSESLPVR	1	Q53EP0	Fibronectin type III domain-containing protein 3B OS=Homo sapiens OX=9606 GN=FNDC3B PE=1 SV=2	658	TGGHSQcSESLPV
ylide_biotin	8	NKPFFDICTSRK	1	O60942	mRNA-capping enzyme OS=Homo sapiens OX=9606 GN=RNGTT PE=1 SV=1	419	KPFFDIcTSRKLL
ylide_biotin	10	FMPVEGMVFCSVECK	4	Q9UGI8	Testin OS=Homo sapiens OX=9606 GN=TES PE=1 SV=1	412	VEGMVFcSVECKK
ylide_biotin	14	FMPVEGMVFCSVECKKR	2	Q9UGI8	Testin OS=Homo sapiens OX=9606 GN=TES PE=1 SV=1	416	VFCSVEcKKRMS
ylide_biotin	4	NCKCGQEEHDVLLSNEEDRK	1	Q9UGI8	Testin OS=Homo sapiens OX=9606 GN=TES PE=1 SV=1	46	ICRNCKcGQEEHD
ylide_biotin	9	NHAVVCQGCHNAIDPEVQR	2	Q9UGI8	Testin OS=Homo sapiens OX=9606 GN=TES PE=1 SV=1	364	AVVCQGcHNAIDP
ylide_biotin	13	SEALGVGDVKLPCEMDAQGPK	10	Q9UGI8	Testin OS=Homo sapiens OX=9606 GN=TES PE=1 SV=1	196	GDVKLPcEMDAQG
ylide_biotin	7	TQYSCYCCK	2	Q9UGI8	Testin OS=Homo sapiens OX=9606 GN=TES PE=1 SV=1	238	TQYSCYcCKLSMK
ylide_biotin	19	VTYNNFSWHASTECFLCSCCSK	1	Q9UGI8	Testin OS=Homo sapiens OX=9606 GN=TES PE=1 SV=1	393	ECFLCScCSKCLI
ylide_biotin	6	LTWHSCPEDEAQ	7	Q13185	Chromobox protein homolog 3 OS=Homo sapiens OX=9606 GN=CBX3 PE=1 SV=4	177	RLTWHScPEDEAQ
ylide_biotin	9	FLVEEKIKCLATEK	1	P45974	Ubiquitin carboxyl-terminal hydrolase 5 OS=Homo sapiens OX=9606 GN=USP5 PE=1 SV=2	471	VEEKIKcLATEKV
ylide_biotin	4	IPPCGWK	3	P45974	Ubiquitin carboxyl-terminal hydrolase 5 OS=Homo sapiens OX=9606 GN=USP5 PE=1 SV=2	195	PARIPPcGWKCSK
ylide_biotin	10	AAGGSPAVGCTTRGPVVSAPLGAAR	1	Q7Z624	Calmodulin-lysine N-methyltransferase OS=Homo sapiens OX=9606 GN=CAMKMT PE=1 SV=2	25	GSPAVGcTTRGPV
ylide_biotin	9	LSIYSTSDCEHGMASVISR	1	Q9BSJ2	Gamma-tubulin complex component 2 OS=Homo sapiens OX=9606 GN=TUBGCP2 PE=1 SV=2	848	IYSTSDcEHGMAS
ylide_biotin	6	EKENLCNLEKK	1	Q86SQ0	Pleckstrin homology-like domain family B member 2 OS=Homo sapiens OX=9606 GN=PHLDB2 PE=1 SV=2	805	REKENLcNLEKKY
ylide_biotin	7	ETARPSCEIVDGTR	1	Q92538	Golgi-specific brefeldin A-resistance guanine nucleotide exchange factor 1 OS=Homo sapiens OX=9606 GN=GBF1 PE=1 SV=2	613	ETARPScEIVDGT
ylide_biotin	11	QFDTDRSGTICSSELPGAFEAAGFHLNEHLYNMIIR	1	P04632	Calpain small subunit 1 OS=Homo sapiens OX=9606 GN=CAPNS1 PE=1 SV=1	190	DRSGTIcSSELPG
ylide_biotin	7	IRNYYFCSLPR	1	Q6SJ93	Serine protease FAM111B OS=Homo sapiens OX=9606 GN=FAM111B PE=1 SV=1	351	IRNYYFcSLPRKY
ylide_biotin	8	LQETPQDCSGGPVRR	1	O14686	Histone-lysine N-methyltransferase 2D OS=Homo sapiens OX=9606 GN=KMT2D PE=1 SV=2	58	QETPQDcSGGPVR
ylide_biotin	10	SVAEQHTPVCSR	1	O14686	Histone-lysine N-methyltransferase 2D OS=Homo sapiens OX=9606 GN=KMT2D PE=1 SV=2	369	EQHTPVcSRFSPP
ylide_biotin	2	MCDKEFMWALK	4	P58546	Myotrophin OS=Homo sapiens OX=9606 GN=MTPN PE=1 SV=2	2	McDKEFMW
ylide_biotin	5	RGNVCGDSK	1	Q05639	Elongation factor 1-alpha 2 OS=Homo sapiens OX=9606 GN=EEF1A2 PE=1 SV=1	326	IRRGNVcGDSKSD
ylide_biotin	16	SGDAAIVEMVPGKPMCVESFSQYPPLGR	4	Q05639	Elongation factor 1-alpha 2 OS=Homo sapiens OX=9606 GN=EEF1A2 PE=1 SV=1	411	VPGKPMcVESFSQ
ylide_biotin	13	SLKPCPFFLEGKCR	1	Q8N5A5	Zinc finger CCCH-type with G patch domain-containing protein OS=Homo sapiens OX=9606 GN=ZGPAT PE=1 SV=3	188	FFLEGKcRFKENC
ylide_biotin	7	LQELESCSGLGSTSDDTDVR	1	Q14C86	GTPase-activating protein and VPS9 domain-containing protein 1 OS=Homo sapiens OX=9606 GN=GAPVD1 PE=1 SV=2	741	LQELEScSGLGST
ylide_biotin	4	TLSCVDRLEVGEVR	1	Q14C86	GTPase-activating protein and VPS9 domain-containing protein 1 OS=Homo sapiens OX=9606 GN=GAPVD1 PE=1 SV=2	293	MYKTLScVDRLEV
ylide_biotin	9	FTVYDRGICPMKGR	1	O75386	Tubby-related protein 3 OS=Homo sapiens OX=9606 GN=TULP3 PE=1 SV=2	286	VYDRGIcPMKGRG
ylide_biotin	13	AAAPAPEEEMDECEQALAAEPK	33	P26641	Elongation factor 1-gamma OS=Homo sapiens OX=9606 GN=EEF1G PE=1 SV=3	266	EEEMDEcEQALAA
ylide_biotin	17	DQQLVYSAGVYRLPKNCS	1	Q9UJX6	Anaphase-promoting complex subunit 2 OS=Homo sapiens OX=9606 GN=ANAPC2 PE=1 SV=1	821	YRLPKNcS
ylide_biotin	10	TPSQLSDNNCRQ	2	Q4G0F5	Vacuolar protein sorting-associated protein 26B OS=Homo sapiens OX=9606 GN=VPS26B PE=1 SV=2	334	QLSDNNcRQ
ylide_biotin	4	RRTCETGEPMEAESGDTSSEGPAQVYLPGR	3	Q9BQ67	Glutamate-rich WD repeat-containing protein 1 OS=Homo sapiens OX=9606 GN=GRWD1 PE=1 SV=1	11	KGRRRTcETGEPM
ylide_biotin	8	ISPLSSPCSSPLQGTPASSLVSK	5	Q14432	cGMP-inhibited 3',5'-cyclic phosphodiesterase A OS=Homo sapiens OX=9606 GN=PDE3A PE=1 SV=3	526	SPLSSPcSSPLQG
ylide_biotin	31	TDDTAQVTSDYETNNNSDSSDIVQNEDETECLREPLRK	1	Q14432	cGMP-inhibited 3',5'-cyclic phosphodiesterase A OS=Homo sapiens OX=9606 GN=PDE3A PE=1 SV=3	645	NEDETEcLREPLR
ylide_biotin	5	TSLPCIPR	1	Q14432	cGMP-inhibited 3',5'-cyclic phosphodiesterase A OS=Homo sapiens OX=9606 GN=PDE3A PE=1 SV=3	315	RRTSLPcIPREQL
ylide_biotin	13	VNPVTSLSENYTCSDSEESSEKDK	3	Q14432	cGMP-inhibited 3',5'-cyclic phosphodiesterase A OS=Homo sapiens OX=9606 GN=PDE3A PE=1 SV=3	407	LSENYTcSDSEES
ylide_biotin	17	EAEGEQFVEEALEKSPCQTDVLR	1	O14879	Interferon-induced protein with tetratricopeptide repeats 3 OS=Homo sapiens OX=9606 GN=IFIT3 PE=1 SV=1	239	ALEKSPcQTDVLR
ylide_biotin	2	YCNLQKYNGK	1	O14879	Interferon-induced protein with tetratricopeptide repeats 3 OS=Homo sapiens OX=9606 GN=IFIT3 PE=1 SV=1	365	QSHQRYcNLQKYN
ylide_biotin	2	GCREEPGPLR	1	P78549	Endonuclease III-like protein 1 OS=Homo sapiens OX=9606 GN=NTHL1 PE=1 SV=2	32	GAGPRGcREEPGP
ylide_biotin	3	ISCGGGINVDVNQHPDGGPGGK	1	Q96F45	Zinc finger protein 503 OS=Homo sapiens OX=9606 GN=ZNF503 PE=1 SV=1	286	AHGRIScGGGINV
ylide_biotin	5	VALHCVDTR	1	Q8WUA8	Tsukushi OS=Homo sapiens OX=9606 GN=TSKU PE=1 SV=3	339	PKVALHcVDTRDS
ylide_biotin	7	HGAGSGCLGTMEVK	1	Q9BYG5	Partitioning defective 6 homolog beta OS=Homo sapiens OX=9606 GN=PARD6B PE=1 SV=1	13	HGAGSGcLGTMEV
ylide_biotin	3	IICQGFTGK	2	P53597	Succinate--CoA ligase [ADP/GDP-forming] subunit alpha, mitochondrial OS=Homo sapiens OX=9606 GN=SUCLG1 PE=1 SV=4	60	KNTKIIcQGFTGK
ylide_biotin	6	LIGPNCPGVINPGECK	1	P53597	Succinate--CoA ligase [ADP/GDP-forming] subunit alpha, mitochondrial OS=Homo sapiens OX=9606 GN=SUCLG1 PE=1 SV=4	172	RLIGPNcPGVINP
ylide_biotin	5	SLRECELYVQK	5	P10644	cAMP-dependent protein kinase type I-alpha regulatory subunit OS=Homo sapiens OX=9606 GN=PRKAR1A PE=1 SV=1	18	ARSLREcELYVQK
ylide_biotin	7	MLLGNKCDMDDKR	1	P61026	Ras-related protein Rab-10 OS=Homo sapiens OX=9606 GN=RAB10 PE=1 SV=1	124	MLLGNKcDMDDKR
ylide_biotin	3	DSCGKGEMATGNGR	7	P61758	Prefoldin subunit 3 OS=Homo sapiens OX=9606 GN=VBP1 PE=1 SV=4	8	AAVKDScGKGEMA
ylide_biotin	11	CGESGHLAKDCDLQEDACYNCGR	3	P62633	CCHC-type zinc finger nucleic acid binding protein OS=Homo sapiens OX=9606 GN=CNBP PE=1 SV=1	67	GHLAKDcDLQEDA
ylide_biotin	11	CGESGHLARECTIEATA	6	P62633	CCHC-type zinc finger nucleic acid binding protein OS=Homo sapiens OX=9606 GN=CNBP PE=1 SV=1	171	GHLAREcTIEATA
ylide_biotin	11	CGETGHVAINCSK	10	P62633	CCHC-type zinc finger nucleic acid binding protein OS=Homo sapiens OX=9606 GN=CNBP PE=1 SV=1	150	GHVAINcSKTSEV
ylide_biotin	4	CYSCGEFGHIQK	5	P62633	CCHC-type zinc finger nucleic acid binding protein OS=Homo sapiens OX=9606 GN=CNBP PE=1 SV=1	122	EQKCYScGEFGHI
ylide_biotin	14	CYSCGEFGHIQKDCTK	4	P62633	CCHC-type zinc finger nucleic acid binding protein OS=Homo sapiens OX=9606 GN=CNBP PE=1 SV=1	132	GHIQKDcTKVKCY
ylide_biotin	2	DCDHADEQK	8	P62633	CCHC-type zinc finger nucleic acid binding protein OS=Homo sapiens OX=9606 GN=CNBP PE=1 SV=1	111	GHLARDcDHADEQ
ylide_biotin	10	DCDHADEQKCYSCGEFGHIQKDCTK	1	P62633	CCHC-type zinc finger nucleic acid binding protein OS=Homo sapiens OX=9606 GN=CNBP PE=1 SV=1	119	HADEQKcYSCGEF
ylide_biotin	12	DCDLQEDACYNCGRGGHIAK	2	P62633	CCHC-type zinc finger nucleic acid binding protein OS=Homo sapiens OX=9606 GN=CNBP PE=1 SV=1	77	EDACYNcGRGGHI
ylide_biotin	2	DCKEPK	13	P62633	CCHC-type zinc finger nucleic acid binding protein OS=Homo sapiens OX=9606 GN=CNBP PE=1 SV=1	87	GHIAKDcKEPKRE
ylide_biotin	5	EREQCCYNCGKPGHLAR	16	P62633	CCHC-type zinc finger nucleic acid binding protein OS=Homo sapiens OX=9606 GN=CNBP PE=1 SV=1	97	KREREQcCYNCGK
ylide_biotin	13	GFQFVSSSLPDICYR	6	P62633	CCHC-type zinc finger nucleic acid binding protein OS=Homo sapiens OX=9606 GN=CNBP PE=1 SV=1	54	SSLPDIcYRCGES
ylide_biotin	6	TSEVNCYR	21	P62633	CCHC-type zinc finger nucleic acid binding protein OS=Homo sapiens OX=9606 GN=CNBP PE=1 SV=1	158	KTSEVNcYRCGES
ylide_biotin	9	TSEVNCYRCGESGHLAR	15	P62633	CCHC-type zinc finger nucleic acid binding protein OS=Homo sapiens OX=9606 GN=CNBP PE=1 SV=1	161	EVNCYRcGESGHL
ylide_biotin	4	FQKCLAVGMVK	2	P22736	Nuclear receptor subfamily 4 group A member 1 OS=Homo sapiens OX=9606 GN=NR4A1 PE=1 SV=1	327	FCRFQKcLAVGMV
ylide_biotin	3	MPCIQAQYGTPAPSPGPR	2	P22736	Nuclear receptor subfamily 4 group A member 1 OS=Homo sapiens OX=9606 GN=NR4A1 PE=1 SV=1	3	MPcIQAQYG
ylide_biotin	9	YICLANKDCPVDKR	1	P22736	Nuclear receptor subfamily 4 group A member 1 OS=Homo sapiens OX=9606 GN=NR4A1 PE=1 SV=1	309	CLANKDcPVDKRR
ylide_biotin	8	ADTSLNNCEGAAGSTSEK	2	O76080	AN1-type zinc finger protein 5 OS=Homo sapiens OX=9606 GN=ZFAND5 PE=1 SV=1	76	DTSLNNcEGAAGS
ylide_biotin	8	TNGMCSVCYKEHLQR	2	O76080	AN1-type zinc finger protein 5 OS=Homo sapiens OX=9606 GN=ZFAND5 PE=1 SV=1	33	NGMCSVcYKEHLQ
ylide_biotin	7	YSDKHNCPYDYKAEAAAK	3	O76080	AN1-type zinc finger protein 5 OS=Homo sapiens OX=9606 GN=ZFAND5 PE=1 SV=1	186	YSDKHNcPYDYKA
ylide_biotin	16	VQGGVPAGSDEYEDECPHLIALSSLNR	1	Q9BVS4	Serine/threonine-protein kinase RIO2 OS=Homo sapiens OX=9606 GN=RIOK2 PE=1 SV=2	449	DEYEDEcPHLIAL
ylide_biotin	4	RRPCEQISPEEEER	1	P15407	Fos-related antigen 1 OS=Homo sapiens OX=9606 GN=FOSL1 PE=1 SV=1	97	GVRRRPcEQISPE
ylide_biotin	8	SLDQTSPCPLVLVR	2	Q6XZF7	Dynamin-binding protein OS=Homo sapiens OX=9606 GN=DNMBP PE=1 SV=1	691	LDQTSPcPLVLVR
ylide_biotin	13	KLENTGIEANVLCLESEISENILEK	1	Q99590	Protein SCAF11 OS=Homo sapiens OX=9606 GN=SCAF11 PE=1 SV=2	506	IEANVLcLESEIS
ylide_biotin	2	SCNEQIEESEK	3	Q99590	Protein SCAF11 OS=Homo sapiens OX=9606 GN=SCAF11 PE=1 SV=2	450	ANCLKScNEQIEE
ylide_biotin	9	VGSSSSESCAQDLPVLVGEEGEVK	1	Q99590	Protein SCAF11 OS=Homo sapiens OX=9606 GN=SCAF11 PE=1 SV=2	478	SSSSEScAQDLPV
ylide_biotin	7	VYQPVSCPLSDLSENVESVVNEEK	1	Q99590	Protein SCAF11 OS=Homo sapiens OX=9606 GN=SCAF11 PE=1 SV=2	566	VYQPVScPLSDLS
ylide_biotin	5	FRAACEQQAVALTLQEDR	1	Q9BUH6	Protein PAXX OS=Homo sapiens OX=9606 GN=PAXX PE=1 SV=2	80	PRFRAAcEQQAVA
ylide_biotin	3	RRCPGESLINPGFK	4	Q9BUH6	Protein PAXX OS=Homo sapiens OX=9606 GN=PAXX PE=1 SV=2	180	PGVRRRcPGESLI
ylide_biotin	9	KPEEMPTACPGHSPR	1	Q9NZC9	SWI/SNF-related matrix-associated actin-dependent regulator of chromatin subfamily A-like protein 1 OS=Homo sapiens OX=9606 GN=SMARCAL1 PE=1 SV=1	108	EEMPTAcPGHSPR
ylide_biotin	23	MAASEVAGVVANAPSPPESSSLCASKSDEGLPDGLSTK	2	Q8ND24	RING finger protein 214 OS=Homo sapiens OX=9606 GN=RNF214 PE=1 SV=2	23	PESSSLcASKSDE
ylide_biotin	7	QLASRNCSEEKSPQTSILK	1	Q8ND24	RING finger protein 214 OS=Homo sapiens OX=9606 GN=RNF214 PE=1 SV=2	149	QLASRNcSEEKSP
ylide_biotin	6	SLKAGCHTK	2	Q8ND24	RING finger protein 214 OS=Homo sapiens OX=9606 GN=RNF214 PE=1 SV=2	139	RSLKAGcHTKQLA
ylide_biotin	8	SSHAPATCKLCLMCQK	4	Q8ND24	RING finger protein 214 OS=Homo sapiens OX=9606 GN=RNF214 PE=1 SV=2	655	SHAPATcKLCLMC
ylide_biotin	13	ARYDSGGVSNGDCSLGVSGDEAR	1	Q9UPR0	Inactive phospholipase C-like protein 2 OS=Homo sapiens OX=9606 GN=PLCL2 PE=1 SV=2	59	GVSNGDcSLGVSG
ylide_biotin	8	ELANSPDCPQMCAYK	4	P48739	Phosphatidylinositol transfer protein beta isoform OS=Homo sapiens OX=9606 GN=PITPNB PE=1 SV=2	187	LANSPDcPQMCAY
ylide_biotin	2	DCDPGSPR	2	Q00341	Vigilin OS=Homo sapiens OX=9606 GN=HDLBP PE=1 SV=2	940	GREAKDcDPGSPR
ylide_biotin	4	RANCEAAR	1	Q00341	Vigilin OS=Homo sapiens OX=9606 GN=HDLBP PE=1 SV=2	636	TGKRANcEAARSR
ylide_biotin	3	RPCPYEQAQGGDGPEEQ	1	Q9H1C4	Protein unc-93 homolog B1 OS=Homo sapiens OX=9606 GN=UNC93B1 PE=1 SV=2	583	GLGRRPcPYEQAQ
ylide_biotin	11	GSIYCVAWSPCGQLLATGSNDKYVK	1	O94967	WD repeat-containing protein 47 OS=Homo sapiens OX=9606 GN=WDR47 PE=1 SV=1	672	CVAWSPcGQLLAT
ylide_biotin	11	SLNPALDGLTCGLTSHDKR	1	O94967	WD repeat-containing protein 47 OS=Homo sapiens OX=9606 GN=WDR47 PE=1 SV=1	322	ALDGLTcGLTSHD
ylide_biotin	4	KVACIGAWHPAR	10	P39023	60S ribosomal protein L3 OS=Homo sapiens OX=9606 GN=RPL3 PE=1 SV=2	253	GLRKVAcIGAWHP
ylide_biotin	11	TVFAEHISDECKRR	1	P39023	60S ribosomal protein L3 OS=Homo sapiens OX=9606 GN=RPL3 PE=1 SV=2	114	EHISDEcKRRFYK
ylide_biotin	9	GQDPVSSPCG	2	Q96S66	Chloride channel CLIC-like protein 1 OS=Homo sapiens OX=9606 GN=CLCC1 PE=1 SV=1	550	DPVSSPcG
ylide_biotin	10	VILITPTPLCETAWEEQCIIQGCK	1	Q2TAA2	Isoamyl acetate-hydrolyzing esterase 1 homolog OS=Homo sapiens OX=9606 GN=IAH1 PE=1 SV=1	137	ITPTPLcETAWEE
ylide_biotin	8	WGINTYKCTK	1	P53365	Arfaptin-2 OS=Homo sapiens OX=9606 GN=ARFIP2 PE=1 SV=1	106	GINTYKcTKQLLS
ylide_biotin	9	DIKWDFTPCKNLR	5	P38606	V-type proton ATPase catalytic subunit A OS=Homo sapiens OX=9606 GN=ATP6V1A PE=1 SV=2	138	KWDFTPcKNLRVG
ylide_biotin	5	TSKACFQVGTSEEMK	2	P35658	Nuclear pore complex protein Nup214 OS=Homo sapiens OX=9606 GN=NUP214 PE=1 SV=2	728	ARTSKAcFQVGTS
ylide_biotin	7	ANAAAMCAK	1	P18583	Protein SON OS=Homo sapiens OX=9606 GN=SON PE=1 SV=4	2070	ANAAAMcAKAGVP
ylide_biotin	8	EMEHNTVCAAGTSPVGEIGEEK	1	P18583	Protein SON OS=Homo sapiens OX=9606 GN=SON PE=1 SV=4	1551	MEHNTVcAAGTSP
ylide_biotin	3	SRCVSVQTDPTDEIPTKK	1	P18583	Protein SON OS=Homo sapiens OX=9606 GN=SON PE=1 SV=4	92	GSRKSRcVSVQTD
ylide_biotin	5	HQQACLREK	1	Q9HAU0	Pleckstrin homology domain-containing family A member 5 OS=Homo sapiens OX=9606 GN=PLEKHA5 PE=1 SV=1	916	RRHQQAcLREKKK
ylide_biotin	7	SAVEQLCLAESTRPR	2	Q9HAU0	Pleckstrin homology domain-containing family A member 5 OS=Homo sapiens OX=9606 GN=PLEKHA5 PE=1 SV=1	891	SAVEQLcLAESTR
ylide_biotin	7	TRPESICSVTPSTHDK	2	Q9HAU0	Pleckstrin homology domain-containing family A member 5 OS=Homo sapiens OX=9606 GN=PLEKHA5 PE=1 SV=1	473	TRPESIcSVTPST
ylide_biotin	8	SLTLPQTCNREK	1	Q2M3W8	Zinc finger protein 181 OS=Homo sapiens OX=9606 GN=ZNF181 PE=1 SV=1	231	LTLPQTcNREKIY
ylide_biotin	6	LLVPKCVMLK	1	P18754	Regulator of chromosome condensation OS=Homo sapiens OX=9606 GN=RCC1 PE=1 SV=1	228	RLLVPKcVMLKSR
ylide_biotin	6	KKSVLCSTPTINIPASPFMQK	2	Q96KB5	Lymphokine-activated killer T-cell-originated protein kinase OS=Homo sapiens OX=9606 GN=PBK PE=1 SV=3	22	KKKSVLcSTPTIN
ylide_biotin	6	KINPICNDHYR	8	Q96KB5	Lymphokine-activated killer T-cell-originated protein kinase OS=Homo sapiens OX=9606 GN=PBK PE=1 SV=3	70	KKINPIcNDHYRS
ylide_biotin	3	SQCRNSPSNLSSSSDTGSVGGTYR	1	O43166	Signal-induced proliferation-associated 1-like protein 1 OS=Homo sapiens OX=9606 GN=SIPA1L1 PE=1 SV=4	1146	ALARSQcRNSPSN
ylide_biotin	5	NYLSCDVEVRR	1	P43304	Glycerol-3-phosphate dehydrogenase, mitochondrial OS=Homo sapiens OX=9606 GN=GPD2 PE=1 SV=3	385	VRNYLScDVEVRR
ylide_biotin	10	RVPIPVDRSCGGL	4	P43304	Glycerol-3-phosphate dehydrogenase, mitochondrial OS=Homo sapiens OX=9606 GN=GPD2 PE=1 SV=3	724	IPVDRScGGL
ylide_biotin	6	ETAAACVEK	6	Q15631	Translin OS=Homo sapiens OX=9606 GN=TSN PE=1 SV=1	225	KETAAAcVEK
ylide_biotin	6	LLKPMCQENLPIEAVYHR	1	Q9NVX0	HAUS augmin-like complex subunit 2 OS=Homo sapiens OX=9606 GN=HAUS2 PE=1 SV=1	118	RLLKPMcQENLPI
ylide_biotin	11	EKPFSNSKVECQAQAR	3	P23497	Nuclear autoantigen Sp-100 OS=Homo sapiens OX=9606 GN=SP100 PE=1 SV=3	309	SNSKVEcQAQART
ylide_biotin	7	RNHDGECTAAPTNR	3	Q12769	Nuclear pore complex protein Nup160 OS=Homo sapiens OX=9606 GN=NUP160 PE=1 SV=3	1166	RNHDGEcTAAPTN
ylide_biotin	21	DAAQEAEAGTGLEPGSNSGQCSVPLKK	3	Q7Z2E3	Aprataxin OS=Homo sapiens OX=9606 GN=APTX PE=1 SV=2	161	GSNSGQcSVPLKK
ylide_biotin	12	DAAFQNVLTHVCLD	3	Q8NBU5	Outer mitochondrial transmembrane helix translocase OS=Homo sapiens OX=9606 GN=ATAD1 PE=1 SV=1	359	NVLTHVcLD
ylide_biotin	8	LVSGGGACSDTGACTPAR	1	Q9UJC3	Protein Hook homolog 1 OS=Homo sapiens OX=9606 GN=HOOK1 PE=1 SV=2	692	VSGGGAcSDTGAC
ylide_biotin	16	IAPRPASGPIRPIVRCPTVR	7	P26373	60S ribosomal protein L13 OS=Homo sapiens OX=9606 GN=RPL13 PE=1 SV=4	61	IRPIVRcPTVRYH
ylide_biotin	12	FGPFHSNNEIYCNRIR	1	Q9BQ90	Kelch domain-containing protein 3 OS=Homo sapiens OX=9606 GN=KLHDC3 PE=1 SV=1	213	SNNEIYcNRIRVF
ylide_biotin	7	NDTEGACNVLYAFDVNTHK	2	Q9BQ90	Kelch domain-containing protein 3 OS=Homo sapiens OX=9606 GN=KLHDC3 PE=1 SV=1	102	NDTEGAcNVLYAF
ylide_biotin	2	FCPFAER	9	P78417	Glutathione S-transferase omega-1 OS=Homo sapiens OX=9606 GN=GSTO1 PE=1 SV=2	32	IYSMRFcPFAERT
ylide_biotin	15	AQFEYDPAKDDLIPCKEAGIR	1	O14936	Peripheral plasma membrane protein CASK OS=Homo sapiens OX=9606 GN=CASK PE=1 SV=3	633	KDDLIPcKEAGIR
ylide_biotin	9	AQYEEMAKCSR	1	P08729	Keratin, type II cytoskeletal 7 OS=Homo sapiens OX=9606 GN=KRT7 PE=1 SV=5	274	YEEMAKcSRAEAE
ylide_biotin	5	MLQPCGPPADKPEEN	1	Q9BWJ5	Splicing factor 3B subunit 5 OS=Homo sapiens OX=9606 GN=SF3B5 PE=1 SV=1	76	EKMLQPcGPPADK
ylide_biotin	4	AKYCELPVECK	1	Q13888	General transcription factor IIH subunit 2 OS=Homo sapiens OX=9606 GN=GTF2H2 PE=1 SV=1	299	QCRAKYcELPVEC
ylide_biotin	18	ELLTHHVSPPPASSSSECSLIR	1	Q13888	General transcription factor IIH subunit 2 OS=Homo sapiens OX=9606 GN=GTF2H2 PE=1 SV=1	247	ASSSSEcSLIRMG
ylide_biotin	17	EPFDLGEPEQSNGGFPCTTAPK	2	Q99961	Endophilin-A2 OS=Homo sapiens OX=9606 GN=SH3GL1 PE=1 SV=1	277	SNGGFPcTTAPKI
ylide_biotin	5	GSEGCAYLSDDGAATAR	1	Q92478	C-type lectin domain family 2 member B OS=Homo sapiens OX=9606 GN=CLEC2B PE=1 SV=2	123	MRGSEGcAYLSDD
ylide_biotin	7	VELHSTCQTISVDR	2	O00267	Transcription elongation factor SPT5 OS=Homo sapiens OX=9606 GN=SUPT5H PE=1 SV=1	740	VELHSTcQTISVD
ylide_biotin	4	MKGCPVNTEPSGPTCEK	2	P53701	Holocytochrome c-type synthase OS=Homo sapiens OX=9606 GN=HCCS PE=1 SV=1	35	EGKMKGcPVNTEP
ylide_biotin	10	IEPEEPITFCEEAFVSHYR	2	Q8TEH3	DENN domain-containing protein 1A OS=Homo sapiens OX=9606 GN=DENND1A PE=1 SV=2	338	EEPITFcEEAFVS
ylide_biotin	7	LCSHPGCTEDESHADLLR	1	Q9NWX5	Ankyrin repeat and SOCS box protein 6 OS=Homo sapiens OX=9606 GN=ASB6 PE=1 SV=1	313	LCSHPGcTEDESH
ylide_biotin	2	GCMEEKPQEVQTSR	2	Q96EB6	NAD-dependent protein deacetylase sirtuin-1 OS=Homo sapiens OX=9606 GN=SIRT1 PE=1 SV=2	574	VSESKGcMEEKPQ
ylide_biotin	7	FLGADKCMYPFIAQR	1	Q8IZV5	Retinol dehydrogenase 10 OS=Homo sapiens OX=9606 GN=RDH10 PE=1 SV=1	320	FLGADKcMYPFIA
ylide_biotin	15	VIEGDVVSALNKAWCVNCFACSTCNTK	1	P48059	LIM and senescent cell antigen-like-containing domain protein 1 OS=Homo sapiens OX=9606 GN=LIMS1 PE=1 SV=4	272	ALNKAWcVNCFAC
ylide_biotin	8	GTPEQPQCGFSNAVVQILR	5	Q86SX6	Glutaredoxin-related protein 5, mitochondrial OS=Homo sapiens OX=9606 GN=GLRX5 PE=1 SV=2	67	TPEQPQcGFSNAV
ylide_biotin	9	ANEDAVPLCMSADFPR	2	Q9C0B1	Alpha-ketoglutarate-dependent dioxygenase FTO OS=Homo sapiens OX=9606 GN=FTO PE=1 SV=3	171	EDAVPLcMSADFP
ylide_biotin	7	TLVPHYCELVGANPK	2	Q96KG9	N-terminal kinase-like protein OS=Homo sapiens OX=9606 GN=SCYL1 PE=1 SV=1	241	TLVPHYcELVGAN
ylide_biotin	6	LKIYNCELENVAEFEGLTDFSDTFK	1	Q9NZM1	Myoferlin OS=Homo sapiens OX=9606 GN=MYOF PE=1 SV=1	1483	KLKIYNcELENVA
ylide_biotin	7	MAAGVDCGDGVGAR	7	Q5TBB1	Ribonuclease H2 subunit B OS=Homo sapiens OX=9606 GN=RNASEH2B PE=1 SV=1	7	MAAGVDcGDGVGA
ylide_biotin	3	GLCESVVEADLVEALEK	1	Q8WVV9	Heterogeneous nuclear ribonucleoprotein L-like OS=Homo sapiens OX=9606 GN=HNRNPLL PE=1 SV=1	84	VHVRGLcESVVEA
ylide_biotin	8	KIEDLRQCLNR	1	Q86W92	Liprin-beta-1 OS=Homo sapiens OX=9606 GN=PPFIBP1 PE=1 SV=2	332	IEDLRQcLNRYKK
ylide_biotin	8	INNFEPNCLRR	1	Q86W92	Liprin-beta-1 OS=Homo sapiens OX=9606 GN=PPFIBP1 PE=1 SV=2	788	NNFEPNcLRRRPS
ylide_biotin	7	HHNQPYCGIAPYIR	6	P08621	U1 small nuclear ribonucleoprotein 70 kDa OS=Homo sapiens OX=9606 GN=SNRNP70 PE=1 SV=2	39	HHNQPYcGIAPYI
ylide_biotin	7	GIIEKSCQGPR	1	O00116	Alkyldihydroxyacetonephosphate synthase, peroxisomal OS=Homo sapiens OX=9606 GN=AGPS PE=1 SV=1	349	GIIEKScQGPRMS
ylide_biotin	12	DLEAAGAERSPCPEAAAPPPGPR	1	Q7Z2K8	G protein-regulated inducer of neurite outgrowth 1 OS=Homo sapiens OX=9606 GN=GPRIN1 PE=1 SV=2	778	GAERSPcPEAAAP
ylide_biotin	4	MANCERTFIAIKPDGVQR	9	P15531	Nucleoside diphosphate kinase A OS=Homo sapiens OX=9606 GN=NME1 PE=1 SV=1	4	MANcERTFIA
ylide_biotin	39	TVLGQVVLPGEELLLPEQEDAEGPGGAVERPLSLNARACSRVR	1	Q9NQT5	Exosome complex component RRP40 OS=Homo sapiens OX=9606 GN=EXOSC3 PE=1 SV=3	60	SLNARAcSRVRVV
ylide_biotin	5	MMQICDTYNQK	2	Q9NPA3	Mid1-interacting protein 1 OS=Homo sapiens OX=9606 GN=MID1IP1 PE=1 SV=1	5	MMQIcDTYNQK
ylide_biotin	3	MKCHYEALGVR	1	Q5F1R6	DnaJ homolog subfamily C member 21 OS=Homo sapiens OX=9606 GN=DNAJC21 PE=1 SV=2	3	MKcHYEALG
ylide_biotin	12	AAAAVAAAASSCRPLGSGAGPGPTGAAPVSAPAPGPGPAGK	1	Q9NRL3	Striatin-4 OS=Homo sapiens OX=9606 GN=STRN4 PE=1 SV=2	17	AAAASScRPLGSG
ylide_biotin	2	RCTVDGSPHELESR	1	Q9NRL3	Striatin-4 OS=Homo sapiens OX=9606 GN=STRN4 PE=1 SV=2	337	APDPRRcTVDGSP
ylide_biotin	15	AAELFVETIAKDAYCCAQQGK	3	Q9NR33	DNA polymerase epsilon subunit 4 OS=Homo sapiens OX=9606 GN=POLE4 PE=1 SV=2	84	IAKDAYcCAQQGK
ylide_biotin	6	CHLTACQTGVGAK	1	P52739	Zinc finger protein 131 OS=Homo sapiens OX=9606 GN=ZNF131 PE=1 SV=2	378	KCHLTAcQTGVGA
ylide_biotin	6	NSTLKCHLTACQTGVGAK	1	P52739	Zinc finger protein 131 OS=Homo sapiens OX=9606 GN=ZNF131 PE=1 SV=2	373	RNSTLKcHLTACQ
ylide_biotin	8	NVPHEDICEDSDIDGDYR	4	O00629	Importin subunit alpha-3 OS=Homo sapiens OX=9606 GN=KPNA4 PE=1 SV=1	57	VPHEDIcEDSDID
ylide_biotin	4	DVLCGTDVGK	1	Q12986	Transcriptional repressor NF-X1 OS=Homo sapiens OX=9606 GN=NFX1 PE=1 SV=2	542	TSRDVLcGTDVGK
ylide_biotin	5	EMVICSEASSTYQR	1	Q12986	Transcriptional repressor NF-X1 OS=Homo sapiens OX=9606 GN=NFX1 PE=1 SV=2	901	RKEMVIcSEASST
ylide_biotin	9	EVHQARLECDEECSALER	1	Q12986	Transcriptional repressor NF-X1 OS=Homo sapiens OX=9606 GN=NFX1 PE=1 SV=2	947	HQARLEcDEECSA
ylide_biotin	5	GKLKCEWSNR	3	Q12986	Transcriptional repressor NF-X1 OS=Homo sapiens OX=9606 GN=NFX1 PE=1 SV=2	190	VKGKLKcEWSNRT
ylide_biotin	7	KNSGLNCGTQR	2	Q12986	Transcriptional repressor NF-X1 OS=Homo sapiens OX=9606 GN=NFX1 PE=1 SV=2	32	KNSGLNcGTQRRL
ylide_biotin	7	LECDEECSALER	3	Q12986	Transcriptional repressor NF-X1 OS=Homo sapiens OX=9606 GN=NFX1 PE=1 SV=2	951	LECDEEcSALERK
ylide_biotin	8	NYSSPPPCHLSR	4	Q12986	Transcriptional repressor NF-X1 OS=Homo sapiens OX=9606 GN=NFX1 PE=1 SV=2	54	YSSPPPcHLSRQV
ylide_biotin	5	SNIPCHLVDISCGLPCSATLPCGMHK	2	Q12986	Transcriptional repressor NF-X1 OS=Homo sapiens OX=9606 GN=NFX1 PE=1 SV=2	815	FRSNIPcHLVDIS
ylide_biotin	11	SQQTSFQSSPCNKSPK	3	Q12986	Transcriptional repressor NF-X1 OS=Homo sapiens OX=9606 GN=NFX1 PE=1 SV=2	92	SFQSSPcNKSPKS
ylide_biotin	3	STCDSENLAVINK	2	Q12986	Transcriptional repressor NF-X1 OS=Homo sapiens OX=9606 GN=NFX1 PE=1 SV=2	295	RPAKSTcDSENLA
ylide_biotin	4	TCECGRTR	1	Q12986	Transcriptional repressor NF-X1 OS=Homo sapiens OX=9606 GN=NFX1 PE=1 SV=2	479	MTKTCEcGRTRHT
ylide_biotin	11	IIQLLDDYPKCFIVGADNVGSK	3	P05388	60S acidic ribosomal protein P0 OS=Homo sapiens OX=9606 GN=RPLP0 PE=1 SV=1	27	LDDYPKcFIVGAD
ylide_biotin	4	MSNCCEDISRPR	1	Q8IVQ6	Palmitoyltransferase ZDHHC21 OS=Homo sapiens OX=9606 GN=ZDHHC21 PE=1 SV=1	218	IEKMSNcCEDISR
ylide_biotin	7	LFNTAVCESK	5	Q9BXJ9	N-alpha-acetyltransferase 15, NatA auxiliary subunit OS=Homo sapiens OX=9606 GN=NAA15 PE=1 SV=1	721	LFNTAVcESKDLS
ylide_biotin	5	FVMKCYDPVGK	1	Q9BZE9	Tether containing UBX domain for GLUT4 OS=Homo sapiens OX=9606 GN=ASPSCR1 PE=1 SV=1	174	IRFVMKcYDPVGK
ylide_biotin	5	HLSTCDGQNPPK	5	O15226	NF-kappa-B-repressing factor OS=Homo sapiens OX=9606 GN=NKRF PE=1 SV=2	37	KRHLSTcDGQNPP
ylide_biotin	4	SSQCHTGSSPR	4	O15226	NF-kappa-B-repressing factor OS=Homo sapiens OX=9606 GN=NKRF PE=1 SV=2	424	SVKSSQcHTGSSP
ylide_biotin	14	TDPSDSQTGLAEQCAGIR	2	P46527	Cyclin-dependent kinase inhibitor 1B OS=Homo sapiens OX=9606 GN=CDKN1B PE=1 SV=1	148	TGLAEQcAGIRKR
ylide_biotin	4	LQVCGSDGATYRDECELR	2	O95633	Follistatin-related protein 3 OS=Homo sapiens OX=9606 GN=FSTL3 PE=1 SV=1	135	PARLQVcGSDGAT
ylide_biotin	4	QATCFLGR	1	O95633	Follistatin-related protein 3 OS=Homo sapiens OX=9606 GN=FSTL3 PE=1 SV=1	229	HMRQATcFLGRSI
ylide_biotin	3	LICKAELIR	1	Q14203	Dynactin subunit 1 OS=Homo sapiens OX=9606 GN=DCTN1 PE=1 SV=3	617	LMPRLIcKAELIR
ylide_biotin	4	EKLCLASSVMR	1	Q9H0E9	Bromodomain-containing protein 8 OS=Homo sapiens OX=9606 GN=BRD8 PE=1 SV=2	26	SIREKLcLASSVM
ylide_biotin	8	HTPGDQDCDELGRETGTR	1	P0CG13	Chromosome transmission fidelity protein 8 homolog OS=Homo sapiens OX=9606 GN=CHTF8 PE=1 SV=1	83	TPGDQDcDELGRE
ylide_biotin	3	MTCHKR	15	Q9BVP2	Guanine nucleotide-binding protein-like 3 OS=Homo sapiens OX=9606 GN=GNL3 PE=1 SV=2	15	ASKRMTcHKRYKI
ylide_biotin	13	SSIINSLKQEQMCNVGVSMGLTR	1	Q9BVP2	Guanine nucleotide-binding protein-like 3 OS=Homo sapiens OX=9606 GN=GNL3 PE=1 SV=2	280	LKQEQMcNVGVSM
ylide_biotin	6	MTEEACRTR	1	Q86YP4	Transcriptional repressor p66-alpha OS=Homo sapiens OX=9606 GN=GATAD2A PE=1 SV=1	6	MTEEAcRTRSQK
ylide_biotin	9	SGAIMCENCMTTNQKK	1	Q86YP4	Transcriptional repressor p66-alpha OS=Homo sapiens OX=9606 GN=GATAD2A PE=1 SV=1	441	AIMCENcMTTNQK
ylide_biotin	5	TDFTCRWREEK	1	Q86YP4	Transcriptional repressor p66-alpha OS=Homo sapiens OX=9606 GN=GATAD2A PE=1 SV=1	426	CKTDFTcRWREEK
ylide_biotin	4	EQRCGNGGR	6	P40763	Signal transducer and activator of transcription 3 OS=Homo sapiens OX=9606 GN=STAT3 PE=1 SV=2	418	TLREQRcGNGGRA
ylide_biotin	11	EDGRKFDFDACNEVPPAPK	3	Q15424	Scaffold attachment factor B1 OS=Homo sapiens OX=9606 GN=SAFB PE=1 SV=4	362	KFDFDAcNEVPPA
ylide_biotin	9	ILDILGETCKSEPVKEESSELEQPFAQDTSSVGPDR	3	Q15424	Scaffold attachment factor B1 OS=Homo sapiens OX=9606 GN=SAFB PE=1 SV=4	225	DILGETcKSEPVK
ylide_biotin	3	SSCGRNFWVSGLSSTTR	2	Q15424	Scaffold attachment factor B1 OS=Homo sapiens OX=9606 GN=SAFB PE=1 SV=4	404	EKGRSScGRNFWV
ylide_biotin	2	KCSLPAEEDSVLEK	4	P27816	Microtubule-associated protein 4 OS=Homo sapiens OX=9606 GN=MAP4 PE=1 SV=3	635	TGTGKKcSLPAEE
ylide_biotin	3	NVCLPPEMEVALTEDQVPALK	2	P27816	Microtubule-associated protein 4 OS=Homo sapiens OX=9606 GN=MAP4 PE=1 SV=3	535	VLIKNVcLPPEME
ylide_biotin	5	VSSKCGSK	14	P27816	Microtubule-associated protein 4 OS=Homo sapiens OX=9606 GN=MAP4 PE=1 SV=3	1039	SKVSSKcGSKANI
ylide_biotin	10	VSYSHIQSKCGSK	4	P27816	Microtubule-associated protein 4 OS=Homo sapiens OX=9606 GN=MAP4 PE=1 SV=3	1008	SHIQSKcGSKDNI
ylide_biotin	7	LKADRYCK	8	Q14331	Protein FRG1 OS=Homo sapiens OX=9606 GN=FRG1 PE=1 SV=1	257	LKADRYcK
ylide_biotin	2	QCEINYVKK	1	Q14331	Protein FRG1 OS=Homo sapiens OX=9606 GN=FRG1 PE=1 SV=1	205	KGNVKQcEINYVK
ylide_biotin	6	SDFGSCPPEEQPR	1	Q8WZ82	Esterase OVCA2 OS=Homo sapiens OX=9606 GN=OVCA2 PE=1 SV=1	64	RSDFGScPPEEQP
ylide_biotin	7	NLENYVCRPAIK	1	Q9NR48	Histone-lysine N-methyltransferase ASH1L OS=Homo sapiens OX=9606 GN=ASH1L PE=1 SV=2	108	NLENYVcRPAIKT
ylide_biotin	7	YHPLSSCLTAR	2	Q96T76	MMS19 nucleotide excision repair protein homolog OS=Homo sapiens OX=9606 GN=MMS19 PE=1 SV=2	819	YHPLSScLTARLM
ylide_biotin	17	APQVTESIESSELVTTCQAETLAGVK	2	Q02952	A-kinase anchor protein 12 OS=Homo sapiens OX=9606 GN=AKAP12 PE=1 SV=4	1139	SELVTTcQAETLA
ylide_biotin	5	LKETCVSGEDPTQGADLSPDEK	3	Q02952	A-kinase anchor protein 12 OS=Homo sapiens OX=9606 GN=AKAP12 PE=1 SV=4	470	VKLKETcVSGEDP
ylide_biotin	23	SSEKNEDFAAHPGEDAVPTGPDCQAK	2	Q02952	A-kinase anchor protein 12 OS=Homo sapiens OX=9606 GN=AKAP12 PE=1 SV=4	1479	VPTGPDcQAKSTP
ylide_biotin	16	HPHDIIDDINSGAVECPAS	1	P30050	60S ribosomal protein L12 OS=Homo sapiens OX=9606 GN=RPL12 PE=1 SV=1	162	NSGAVEcPAS
ylide_biotin	20	FFQGSQEFLASASASAERSCTPSPDQISHR	1	Q7Z2W4	Zinc finger CCCH-type antiviral protein 1 OS=Homo sapiens OX=9606 GN=ZC3HAV1 PE=1 SV=3	272	ASAERScTPSPDQ
ylide_biotin	7	LNLLGRCNYSQSER	3	Q7Z2W4	Zinc finger CCCH-type antiviral protein 1 OS=Homo sapiens OX=9606 GN=ZC3HAV1 PE=1 SV=3	96	LNLLGRcNYSQSE
ylide_biotin	3	NLCKYSHEVLSEENFK	3	Q7Z2W4	Zinc finger CCCH-type antiviral protein 1 OS=Homo sapiens OX=9606 GN=ZC3HAV1 PE=1 SV=3	106	QSERNLcKYSHEV
ylide_biotin	16	NSNVDSSYLESLYQSCPRGVVPFQAGSR	4	Q7Z2W4	Zinc finger CCCH-type antiviral protein 1 OS=Homo sapiens OX=9606 GN=ZC3HAV1 PE=1 SV=3	645	ESLYQScPRGVVP
ylide_biotin	4	QQICNQQPPCSR	4	Q7Z2W4	Zinc finger CCCH-type antiviral protein 1 OS=Homo sapiens OX=9606 GN=ZC3HAV1 PE=1 SV=3	162	EGRQQIcNQQPPC
ylide_biotin	17	TSSVSLTATFRPQEDFCFLSSK	1	Q7Z2W4	Zinc finger CCCH-type antiviral protein 1 OS=Homo sapiens OX=9606 GN=ZC3HAV1 PE=1 SV=3	721	RPQEDFcFLSSKK
ylide_biotin	6	YCQRPCDNLHLCK	4	Q7Z2W4	Zinc finger CCCH-type antiviral protein 1 OS=Homo sapiens OX=9606 GN=ZC3HAV1 PE=1 SV=3	82	KYCQRPcDNLHLC
ylide_biotin	9	LVSYLPGFCSLVKR	1	Q9H3L0	Cobalamin trafficking protein CblD OS=Homo sapiens OX=9606 GN=MMADHC PE=1 SV=2	19	SYLPGFcSLVKRV
ylide_biotin	6	MANVLCNRAR	1	Q9H3L0	Cobalamin trafficking protein CblD OS=Homo sapiens OX=9606 GN=MMADHC PE=1 SV=2	6	MANVLcNRARLV
ylide_biotin	11	DDFAYCLNCFCDLYAK	2	Q14192	Four and a half LIM domains protein 2 OS=Homo sapiens OX=9606 GN=FHL2 PE=1 SV=3	214	YCLNCFcDLYAKK
ylide_biotin	6	DNQNFCVPCYEK	1	Q14192	Four and a half LIM domains protein 2 OS=Homo sapiens OX=9606 GN=FHL2 PE=1 SV=3	150	KDNQNFcVPCYEK
ylide_biotin	9	DNQNFCVPCYEKQHAMQCVQCK	2	Q14192	Four and a half LIM domains protein 2 OS=Homo sapiens OX=9606 GN=FHL2 PE=1 SV=3	153	QNFCVPcYEKQHA
ylide_biotin	8	ECFVCTACRK	3	Q14192	Four and a half LIM domains protein 2 OS=Homo sapiens OX=9606 GN=FHL2 PE=1 SV=3	191	CFVCTAcRKQLSG
ylide_biotin	8	EQPWHKECFVCTACR	4	Q14192	Four and a half LIM domains protein 2 OS=Homo sapiens OX=9606 GN=FHL2 PE=1 SV=3	185	QPWHKEcFVCTAC
ylide_biotin	11	EQPWHKECFVCTACRK	1	Q14192	Four and a half LIM domains protein 2 OS=Homo sapiens OX=9606 GN=FHL2 PE=1 SV=3	188	HKECFVcTACRKQ
ylide_biotin	6	FDCHHCNESLFGK	9	Q14192	Four and a half LIM domains protein 2 OS=Homo sapiens OX=9606 GN=FHL2 PE=1 SV=3	10	RFDCHHcNESLFG
ylide_biotin	14	GFLTERDDILCPDCGKDI	8	Q14192	Four and a half LIM domains protein 2 OS=Homo sapiens OX=9606 GN=FHL2 PE=1 SV=3	275	DILCPDcGKDI
ylide_biotin	11	GFLTERDDILCPDCGKDI	2	Q14192	Four and a half LIM domains protein 2 OS=Homo sapiens OX=9606 GN=FHL2 PE=1 SV=3	272	ERDDILcPDCGKD
ylide_biotin	8	GSSWHETCFICHR	1	Q14192	Four and a half LIM domains protein 2 OS=Homo sapiens OX=9606 GN=FHL2 PE=1 SV=3	126	SSWHETcFICHRC
ylide_biotin	14	GSSWHETCFICHRCQQPIGTK	1	Q14192	Four and a half LIM domains protein 2 OS=Homo sapiens OX=9606 GN=FHL2 PE=1 SV=3	132	CFICHRcQQPIGT
ylide_biotin	5	KCAGCTNPISGLGGTK	3	Q14192	Four and a half LIM domains protein 2 OS=Homo sapiens OX=9606 GN=FHL2 PE=1 SV=3	224	AKKCAGcTNPISG
ylide_biotin	2	KCSLSLVGR	4	Q14192	Four and a half LIM domains protein 2 OS=Homo sapiens OX=9606 GN=FHL2 PE=1 SV=3	254	CFNCKKcSLSLVG
ylide_biotin	17	NSLVDKPFAAKEDQLLCTDCYSNEYSSK	1	Q14192	Four and a half LIM domains protein 2 OS=Homo sapiens OX=9606 GN=FHL2 PE=1 SV=3	89	KEDQLLcTDCYSN
ylide_biotin	9	QWHNDCFNCKK	3	Q14192	Four and a half LIM domains protein 2 OS=Homo sapiens OX=9606 GN=FHL2 PE=1 SV=3	251	HNDCFNcKKCSLS
ylide_biotin	3	GVCHIPMAEPFCPK	1	Q13126	S-methyl-5'-thioadenosine phosphorylase OS=Homo sapiens OX=9606 GN=MTAP PE=1 SV=2	136	SCARGVcHIPMAE
ylide_biotin	8	QLEDLSYCREER	1	Q99567	Nuclear pore complex protein Nup88 OS=Homo sapiens OX=9606 GN=NUP88 PE=1 SV=2	608	LEDLSYcREERKS
ylide_biotin	5	STVNCSTTPVAER	1	Q99567	Nuclear pore complex protein Nup88 OS=Homo sapiens OX=9606 GN=NUP88 PE=1 SV=2	155	GKSTVNcSTTPVA
ylide_biotin	7	ALKDLYCHKSD	1	P16220	Cyclic AMP-responsive element-binding protein 1 OS=Homo sapiens OX=9606 GN=CREB1 PE=1 SV=3	323	ALKDLYcHKSD
ylide_biotin	5	EYVKCLENR	4	P16220	Cyclic AMP-responsive element-binding protein 1 OS=Homo sapiens OX=9606 GN=CREB1 PE=1 SV=3	296	KKEYVKcLENRVA
ylide_biotin	3	SACASTNEEK	1	Q9BZ95	Histone-lysine N-methyltransferase NSD3 OS=Homo sapiens OX=9606 GN=NSD3 PE=1 SV=1	1292	VRPKSAcASTNEE
ylide_biotin	11	EWNLPPNAPACMERQLEAAR	4	Q9BQA1	Methylosome protein 50 OS=Homo sapiens OX=9606 GN=WDR77 PE=1 SV=1	26	PPNAPAcMERQLE
ylide_biotin	26	MAAAAAAVGPGAGGAGSAVPGGAGPCATVSVFPGAR	1	Q86X55	Histone-arginine methyltransferase CARM1 OS=Homo sapiens OX=9606 GN=CARM1 PE=1 SV=3	26	PGGAGPcATVSVF
ylide_biotin	6	YQGEHCLLK	1	Q96Q11	CCA tRNA nucleotidyltransferase 1, mitochondrial OS=Homo sapiens OX=9606 GN=TRNT1 PE=1 SV=2	373	KYQGEHcLLKEMQ
ylide_biotin	11	AGDWQCPNPGCGNQNFAWR	3	Q01844	RNA-binding protein EWS OS=Homo sapiens OX=9606 GN=EWSR1 PE=1 SV=1	529	QCPNPGcGNQNFA
ylide_biotin	3	TECNQCK	1	Q01844	RNA-binding protein EWS OS=Homo sapiens OX=9606 GN=EWSR1 PE=1 SV=1	540	FAWRTEcNQCKAP
ylide_biotin	4	CKECKCTSCK	1	P80297	Metallothionein-1X OS=Homo sapiens OX=9606 GN=MT1X PE=1 SV=1	24	SCKCKEcKCTSCK
ylide_biotin	4	CTSCKK	3	P80297	Metallothionein-1X OS=Homo sapiens OX=9606 GN=MT1X PE=1 SV=1	29	ECKCTScKKSCCS
ylide_biotin	6	GTSDKCSCCA	1	P80297	Metallothionein-1X OS=Homo sapiens OX=9606 GN=MT1X PE=1 SV=1	57	KGTSDKcSCCA
ylide_biotin	7	FHSMPACAASSLPR	2	Q92503	SEC14-like protein 1 OS=Homo sapiens OX=9606 GN=SEC14L1 PE=1 SV=2	644	FHSMPAcAASSLP
ylide_biotin	15	VHIPNDDAQFDASHCDSDKGEFGGFGSVTGK	8	Q16576	Histone-binding protein RBBP7 OS=Homo sapiens OX=9606 GN=RBBP7 PE=1 SV=1	97	QFDASHcDSDKGE
ylide_biotin	10	VIPNAICGICLKGK	1	Q8WUB8	PHD finger protein 10 OS=Homo sapiens OX=9606 GN=PHF10 PE=1 SV=3	383	NAICGIcLKGKES
ylide_biotin	5	WICDCCQR	3	Q8WUB8	PHD finger protein 10 OS=Homo sapiens OX=9606 GN=PHF10 PE=1 SV=3	477	GRWICDcCQRAPP
ylide_biotin	5	EKRLCYIQPCDSNILK	1	O95389	Cellular communication network factor 6 OS=Homo sapiens OX=9606 GN=CCN6 PE=1 SV=1	247	RKEKRLcYIQPCD
ylide_biotin	5	NTFGCAGER	1	O94988	Protein FAM13A OS=Homo sapiens OX=9606 GN=FAM13A PE=1 SV=2	459	HKNTFGcAGERSK
ylide_biotin	10	FLQDGTVEGCLEQRLEENLPTR	1	Q86YS7	C2 domain-containing protein 5 OS=Homo sapiens OX=9606 GN=C2CD5 PE=1 SV=1	449	DGTVEGcLEQRLE
ylide_biotin	5	AALGCEPRK	1	Q02833	Ras association domain-containing protein 7 OS=Homo sapiens OX=9606 GN=RASSF7 PE=1 SV=1	122	PRAALGcEPRKTL
ylide_biotin	2	SCQRSDSDAEAQGK	2	Q13131	5'-AMP-activated protein kinase catalytic subunit alpha-1 OS=Homo sapiens OX=9606 GN=PRKAA1 PE=1 SV=4	503	VSNYRScQRSDSD
ylide_biotin	6	GITEECLKQPSLEQK	2	Q9UKV3	Apoptotic chromatin condensation inducer in the nucleus OS=Homo sapiens OX=9606 GN=ACIN1 PE=1 SV=2	546	KGITEEcLKQPSL
ylide_biotin	2	KCEAEEAEPPAATQPQTSETQTSHLPESER	1	Q9UKV3	Apoptotic chromatin condensation inducer in the nucleus OS=Homo sapiens OX=9606 GN=ACIN1 PE=1 SV=2	733	RGSPKKcEAEEAE
ylide_biotin	10	KFDPMGQQTCSAHPAR	4	Q9NPE3	H/ACA ribonucleoprotein complex subunit 3 OS=Homo sapiens OX=9606 GN=NOP10 PE=1 SV=1	28	PMGQQTcSAHPAR
ylide_biotin	22	TSVVFHQLGTAMPMSVEEGPECQGPVVDRR	1	Q9P1U0	DNA-directed RNA polymerase I subunit RPA12 OS=Homo sapiens OX=9606 GN=POLR1H PE=1 SV=1	78	VEEGPEcQGPVVD
ylide_biotin	18	GFGFVTYSCVEEVDAAMCARPHK	3	P51991	Heterogeneous nuclear ribonucleoprotein A3 OS=Homo sapiens OX=9606 GN=HNRNPA3 PE=1 SV=2	94	EVDAAMcARPHKV
ylide_biotin	3	TTCMSSQGSDDEQIKR	2	Q9P0V9	Septin-10 OS=Homo sapiens OX=9606 GN=SEPTIN10 PE=1 SV=2	22	MATKTTcMSSQGS
ylide_biotin	15	AVTEGAQAVEEPSIC	2	P28331	NADH-ubiquinone oxidoreductase 75 kDa subunit, mitochondrial OS=Homo sapiens OX=9606 GN=NDUFS1 PE=1 SV=3	727	VEEPSIc
ylide_biotin	5	YRMECPEIDCEEGWALLK	1	P09914	Interferon-induced protein with tetratricopeptide repeats 1 OS=Homo sapiens OX=9606 GN=IFIT1 PE=1 SV=2	138	FRYRMEcPEIDCE
ylide_biotin	7	VIDQHGCEAIAR	1	Q5EBL4	RILP-like protein 1 OS=Homo sapiens OX=9606 GN=RILPL1 PE=1 SV=1	47	VIDQHGcEAIARL
ylide_biotin	11	TPEEGEKQSQC	1	Q13070	G antigen 6 OS=Homo sapiens OX=9606 GN=GAGE6 PE=1 SV=1	117	GEKQSQc
ylide_biotin	7	AKAWSDCPQIIK	1	Q6ZU35	Capping protein-inhibiting regulator of actin dynamics OS=Homo sapiens OX=9606 GN=CRACD PE=1 SV=3	1228	AKAWSDcPQIIK
ylide_biotin	9	EHSEEPGICEEQNPEAER	1	Q6ZU35	Capping protein-inhibiting regulator of actin dynamics OS=Homo sapiens OX=9606 GN=CRACD PE=1 SV=3	451	SEEPGIcEEQNPE
ylide_biotin	5	GGDRCDAPGGDAAR	2	Q5VV17	OTU domain-containing protein 1 OS=Homo sapiens OX=9606 GN=OTUD1 PE=1 SV=1	244	ERGGDRcDAPGGD
ylide_biotin	3	GRCLLLAPAPAAPVPPR	1	Q5VV17	OTU domain-containing protein 1 OS=Homo sapiens OX=9606 GN=OTUD1 PE=1 SV=1	146	AAPRGRcLLLAPA
ylide_biotin	2	MCSAFHR	2	O43543	DNA repair protein XRCC2 OS=Homo sapiens OX=9606 GN=XRCC2 PE=1 SV=1	2	McSAFHRA
ylide_biotin	6	AHLGSCTLGNFVAGK	1	Q96ME7	Zinc finger protein 512 OS=Homo sapiens OX=9606 GN=ZNF512 PE=1 SV=2	430	KAHLGScTLGNFV
ylide_biotin	3	GKCYGLHAFIVPIR	1	Q15067	Peroxisomal acyl-coenzyme A oxidase 1 OS=Homo sapiens OX=9606 GN=ACOX1 PE=1 SV=3	199	LITKGKcYGLHAF
ylide_biotin	7	LVSLSACGR	3	Q96JN8	Neuralized-like protein 4 OS=Homo sapiens OX=9606 GN=NEURL4 PE=1 SV=2	57	LVSLSAcGRTARR
ylide_biotin	3	RSCGGPSR	1	Q9NS39	Double-stranded RNA-specific editase B2 OS=Homo sapiens OX=9606 GN=ADARB2 PE=1 SV=1	660	TTGRRScGGPSRL
ylide_biotin	5	GELMCYKAK	2	O00534	von Willebrand factor A domain-containing protein 5A OS=Homo sapiens OX=9606 GN=VWA5A PE=1 SV=2	649	PRGELMcYKAKTF
ylide_biotin	4	ASYCGHTEIAR	1	Q53RE8	Ankyrin repeat domain-containing protein 39 OS=Homo sapiens OX=9606 GN=ANKRD39 PE=1 SV=1	107	LHRASYcGHTEIA
ylide_biotin	8	GAGSSSGCGGPK	2	Q9BX10	GTP-binding protein 2 OS=Homo sapiens OX=9606 GN=GTPBP2 PE=1 SV=1	36	AGSSSGcGGPKGK
ylide_biotin	6	TAEEICESSSK	1	Q9BX10	GTP-binding protein 2 OS=Homo sapiens OX=9606 GN=GTPBP2 PE=1 SV=1	249	RTAEEIcESSSKM
ylide_biotin	8	VSELFGGCCRPGGGPAVGGTLK	1	Q9BX10	GTP-binding protein 2 OS=Homo sapiens OX=9606 GN=GTPBP2 PE=1 SV=1	12	SELFGGcCRPGGG
ylide_biotin	13	TYEQIKVDENENCSSLGSPSEPPQTLDLVR	1	Q96P16	Regulation of nuclear pre-mRNA domain-containing protein 1A OS=Homo sapiens OX=9606 GN=RPRD1A PE=1 SV=1	151	VDENENcSSLGSP
ylide_biotin	4	SISCPLKR	6	Q9NW75	G patch domain-containing protein 2 OS=Homo sapiens OX=9606 GN=GPATCH2 PE=1 SV=1	59	HSRSIScPLKRQA
ylide_biotin	9	ELSFSGIPCEGGLR	1	Q9NVG8	TBC1 domain family member 13 OS=Homo sapiens OX=9606 GN=TBC1D13 PE=1 SV=3	36	SFSGIPcEGGLRC
ylide_biotin	7	SLDDSQCGITYK	2	Q9NVG8	TBC1 domain family member 13 OS=Homo sapiens OX=9606 GN=TBC1D13 PE=1 SV=3	282	SLDDSQcGITYKM
ylide_biotin	12	LCDRLELASLQCLNETLTSCTK	2	Q99543	DnaJ homolog subfamily C member 2 OS=Homo sapiens OX=9606 GN=DNAJC2 PE=1 SV=4	394	ELASLQcLNETLT
ylide_biotin	3	RSCTLEGGAK	1	Q9P2R6	Arginine-glutamic acid dipeptide repeats protein OS=Homo sapiens OX=9606 GN=RERE PE=1 SV=2	41	SRPRRScTLEGGA
ylide_biotin	11	EAAALGSRGSCSTEVEKETQEK	1	O75348	V-type proton ATPase subunit G 1 OS=Homo sapiens OX=9606 GN=ATP6V1G1 PE=1 SV=3	69	LGSRGScSTEVEK
ylide_biotin	6	VAQATCKL	1	P35914	Hydroxymethylglutaryl-CoA lyase, mitochondrial OS=Homo sapiens OX=9606 GN=HMGCL PE=1 SV=2	323	KVAQATcKL
ylide_biotin	21	TLTHEHLAMTFDCCYCPPPPCQEAISKEPIVMK	1	Q96BW5	Phosphotriesterase-related protein OS=Homo sapiens OX=9606 GN=PTER PE=1 SV=1	43	YCPPPPcQEAISK
ylide_biotin	5	AGAACTLR	2	P30291	Wee1-like protein kinase OS=Homo sapiens OX=9606 GN=WEE1 PE=1 SV=2	19	RRAGAAcTLRQKL
ylide_biotin	13	AIASASASASGPCVHQQPPGQPPPPQLSSHR	1	P78381	UDP-galactose translocator OS=Homo sapiens OX=9606 GN=SLC35A2 PE=1 SV=1	359	ASASGPcVHQQPP
ylide_biotin	14	ASGQPAGPDNKENCPVPGKPGEAVAAR	3	P04183	Thymidine kinase, cytosolic OS=Homo sapiens OX=9606 GN=TK1 PE=1 SV=2	206	PDNKENcPVPGKP
ylide_biotin	11	KLFAPQQILQCSPAN	4	P04183	Thymidine kinase, cytosolic OS=Homo sapiens OX=9606 GN=TK1 PE=1 SV=2	230	PQQILQcSPAN
ylide_biotin	3	MSCINLPTVLPGSPSK	1	P04183	Thymidine kinase, cytosolic OS=Homo sapiens OX=9606 GN=TK1 PE=1 SV=2	3	MScINLPTV
ylide_biotin	6	YSSSFCTHDR	3	P04183	Thymidine kinase, cytosolic OS=Homo sapiens OX=9606 GN=TK1 PE=1 SV=2	66	RYSSSFcTHDRNT
ylide_biotin	13	DAPAPAASQPSGCGKHNSPER	1	Q96I15	Selenocysteine lyase OS=Homo sapiens OX=9606 GN=SCLY PE=1 SV=4	22	ASQPSGcGKHNSP
ylide_biotin	4	AKICPGENQAAEDELRK	5	P54278	Mismatch repair endonuclease PMS2 OS=Homo sapiens OX=9606 GN=PMS2 PE=1 SV=2	653	KFRAKIcPGENQA
ylide_biotin	9	EETQEDKDCPIKEEK	2	P18031	Tyrosine-protein phosphatase non-receptor type 1 OS=Homo sapiens OX=9606 GN=PTPN1 PE=1 SV=1	344	TQEDKDcPIKEEK
ylide_biotin	2	LCLKELVEEQGR	1	Q5D0E6	DALR anticodon-binding domain-containing protein 3 OS=Homo sapiens OX=9606 GN=DALRD3 PE=1 SV=2	217	GILGRLcLKELVE
ylide_biotin	9	YFGDALPACAKGCDHCQNPTAVR	1	O94762	ATP-dependent DNA helicase Q5 OS=Homo sapiens OX=9606 GN=RECQL5 PE=1 SV=2	427	GDALPAcAKGCDH
ylide_biotin	13	QVTDAETKPKSPCT	4	O43684	Mitotic checkpoint protein BUB3 OS=Homo sapiens OX=9606 GN=BUB3 PE=1 SV=1	327	TKPKSPcT
ylide_biotin	3	TPCNAGTFSQPEK	3	O43684	Mitotic checkpoint protein BUB3 OS=Homo sapiens OX=9606 GN=BUB3 PE=1 SV=1	129	WDPRTPcNAGTFS
ylide_biotin	4	ISGCDRTVK	4	Q9H0H5	Rac GTPase-activating protein 1 OS=Homo sapiens OX=9606 GN=RACGAP1 PE=1 SV=1	389	LYRISGcDRTVKE
ylide_biotin	18	ALIERPSQNNIGIQTMECSLRVPETVSAATQTIK	1	Q12888	TP53-binding protein 1 OS=Homo sapiens OX=9606 GN=TP53BP1 PE=1 SV=2	1159	GIQTMEcSLRVPE
ylide_biotin	13	DGDMHSSSLTVECSKTSEIEPK	2	Q12888	TP53-binding protein 1 OS=Homo sapiens OX=9606 GN=TP53BP1 PE=1 SV=2	489	SSLTVEcSKTSEI
ylide_biotin	14	GDSGAAPDVDDKLCLR	3	Q12888	TP53-binding protein 1 OS=Homo sapiens OX=9606 GN=TP53BP1 PE=1 SV=2	986	DVDDKLcLRMKLV
ylide_biotin	11	KGVSQTGTPVCEEDGDAGLGIR	4	Q12888	TP53-binding protein 1 OS=Homo sapiens OX=9606 GN=TP53BP1 PE=1 SV=2	1375	QTGTPVcEEDGDA
ylide_biotin	19	KSATVKPGAVGAGEFVSPCESGDNTGEPSALEEQR	1	Q12888	TP53-binding protein 1 OS=Homo sapiens OX=9606 GN=TP53BP1 PE=1 SV=2	1703	GEFVSPcESGDNT
ylide_biotin	13	LGKPSAHASQSFCESSSETPFHFTLPK	3	Q12888	TP53-binding protein 1 OS=Homo sapiens OX=9606 GN=TP53BP1 PE=1 SV=2	896	HASQSFcESSSET
ylide_biotin	7	TVSSDGCSTPSREEGGCSLASTPATTLHLLQLSGQR	1	Q12888	TP53-binding protein 1 OS=Homo sapiens OX=9606 GN=TP53BP1 PE=1 SV=2	319	TVSSDGcSTPSRE
ylide_biotin	13	VADPVDSSNLDTCGSISQVIEQLPQPNR	1	Q12888	TP53-binding protein 1 OS=Homo sapiens OX=9606 GN=TP53BP1 PE=1 SV=2	101	SSNLDTcGSISQV
ylide_biotin	5	VDVSCEPLEGVEK	3	Q12888	TP53-binding protein 1 OS=Homo sapiens OX=9606 GN=TP53BP1 PE=1 SV=2	772	PRVDVScEPLEGV
ylide_biotin	16	VPETVSAATQTIKNVCEQGTSTVDQNFGK	4	Q12888	TP53-binding protein 1 OS=Homo sapiens OX=9606 GN=TP53BP1 PE=1 SV=2	1178	QTIKNVcEQGTST
ylide_biotin	6	HAIVVCQETDDTYIPLNHMDPNQK	1	Q96HY7	Probable 2-oxoglutarate dehydrogenase E1 component DHKTD1, mitochondrial OS=Homo sapiens OX=9606 GN=DHTKD1 PE=1 SV=2	610	RHAIVVcQETDDT
ylide_biotin	7	TEDGHSCGASRE	2	Q8N0V3	Putative ribosome-binding factor A, mitochondrial OS=Homo sapiens OX=9606 GN=RBFA PE=1 SV=3	338	TEDGHScGASRE
ylide_biotin	15	FQGSQGHISIPQPDCPAEAR	1	P55199	RNA polymerase II elongation factor ELL OS=Homo sapiens OX=9606 GN=ELL PE=1 SV=1	70	SIPQPDcPAEART
ylide_biotin	4	VANCSLGTATIISENLNNEVMMK	1	Q6WKZ4	Rab11 family-interacting protein 1 OS=Homo sapiens OX=9606 GN=RAB11FIP1 PE=1 SV=3	1192	ATKVANcSLGTAT
ylide_biotin	5	KGGNCDLSHQER	4	Q9H410	Kinetochore-associated protein DSN1 homolog OS=Homo sapiens OX=9606 GN=DSN1 PE=1 SV=2	65	PKKGGNcDLSHQE
ylide_biotin	17	LQLQNPPAIHGSGSGSCQ	1	Q9H410	Kinetochore-associated protein DSN1 homolog OS=Homo sapiens OX=9606 GN=DSN1 PE=1 SV=2	355	GSGSGScQ
ylide_biotin	5	GVPGCCYSSLPR	1	Q9Y4H2	Insulin receptor substrate 2 OS=Homo sapiens OX=9606 GN=IRS2 PE=1 SV=2	801	LRGVPGcCYSSLP
ylide_biotin	5	LCPSCPASSPK	1	Q9Y4H2	Insulin receptor substrate 2 OS=Homo sapiens OX=9606 GN=IRS2 PE=1 SV=2	616	GRLCPScPASSPK
ylide_biotin	8	SHTLSGGCGGRGSK	1	Q9Y4H2	Insulin receptor substrate 2 OS=Homo sapiens OX=9606 GN=IRS2 PE=1 SV=2	409	HTLSGGcGGRGSK
ylide_biotin	18	SLGGLISAVGVGSTGGGCGGPGPGALPPANTYASIDFLSHHLK	1	Q9Y4H2	Insulin receptor substrate 2 OS=Homo sapiens OX=9606 GN=IRS2 PE=1 SV=2	1306	GSTGGGcGGPGPG
ylide_biotin	6	FKAPPCNTFVDLTSACK	1	Q7Z333	Probable helicase senataxin OS=Homo sapiens OX=9606 GN=SETX PE=1 SV=4	602	KFKAPPcNTFVDL
ylide_biotin	7	NGPERGCDRGIIVSTR	1	Q7Z333	Probable helicase senataxin OS=Homo sapiens OX=9606 GN=SETX PE=1 SV=4	736	NGPERGcDRGIIV
ylide_biotin	5	QLIKCMPSEPETIK	2	Q7Z333	Probable helicase senataxin OS=Homo sapiens OX=9606 GN=SETX PE=1 SV=4	1416	RKQLIKcMPSEPE
ylide_biotin	5	RLSDCESTDVKR	1	Q7Z333	Probable helicase senataxin OS=Homo sapiens OX=9606 GN=SETX PE=1 SV=4	1368	RRRLSDcESTDVK
ylide_biotin	6	ADELLCWEDSAGHWLYE	1	Q13232	Nucleoside diphosphate kinase 3 OS=Homo sapiens OX=9606 GN=NME3 PE=1 SV=2	158	RADELLcWEDSAG
ylide_biotin	6	TVIEDCNKVQEK	1	Q9BZD4	Kinetochore protein Nuf2 OS=Homo sapiens OX=9606 GN=NUF2 PE=1 SV=2	377	RTVIEDcNKVQEK
ylide_biotin	6	SPSTSCLYGKK	1	Q6ZVD8	PH domain leucine-rich repeat-containing protein phosphatase 2 OS=Homo sapiens OX=9606 GN=PHLPP2 PE=1 SV=3	1234	KSPSTScLYGKKL
ylide_biotin	4	SGSCSR	7	Q9BZE4	GTP-binding protein 4 OS=Homo sapiens OX=9606 GN=GTPBP4 PE=1 SV=3	570	VARSGScSRTPRD
ylide_biotin	12	KPEASGPEAEPCPELHTEPVEPLTR	1	A4D1P6	WD repeat-containing protein 91 OS=Homo sapiens OX=9606 GN=WDR91 PE=1 SV=2	366	GPEAEPcPELHTE
ylide_biotin	6	HVSPSCSTSR	3	Q9BVS5	tRNA (adenine(58)-N(1))-methyltransferase, mitochondrial OS=Homo sapiens OX=9606 GN=TRMT61B PE=1 SV=2	143	RHVSPScSTSRER
ylide_biotin	4	RLECLKEDVQR	1	Q99459	Cell division cycle 5-like protein OS=Homo sapiens OX=9606 GN=CDC5L PE=1 SV=2	769	IPRRLEcLKEDVQ
ylide_biotin	14	AWVWNTHADFADECPKPELLAIR	11	P43487	Ran-specific GTPase-activating protein OS=Homo sapiens OX=9606 GN=RANBP1 PE=1 SV=1	132	ADFADEcPKPELL
ylide_biotin	6	AEASGCR	3	Q7Z2T5	TRMT1-like protein OS=Homo sapiens OX=9606 GN=TRMT1L PE=1 SV=2	730	KAEASGcRRW
ylide_biotin	9	EADTDVQVCPNYSIPQKTDSYFNPK	1	Q7Z2T5	TRMT1-like protein OS=Homo sapiens OX=9606 GN=TRMT1L PE=1 SV=2	239	DTDVQVcPNYSIP
ylide_biotin	18	VTINDLNENSVTLIQENCHLNK	1	Q7Z2T5	TRMT1-like protein OS=Homo sapiens OX=9606 GN=TRMT1L PE=1 SV=2	320	TLIQENcHLNKLK
ylide_biotin	7	GAPNNSCSEIK	4	Q05086	Ubiquitin-protein ligase E3A OS=Homo sapiens OX=9606 GN=UBE3A PE=1 SV=4	108	GAPNNScSEIKMN
ylide_biotin	2	ACGDLR	3	Q9BRZ2	E3 ubiquitin-protein ligase TRIM56 OS=Homo sapiens OX=9606 GN=TRIM56 PE=1 SV=3	91	LVKARAcGDLRAG
ylide_biotin	6	AGKPACALCPLVGGTSTGGPATAR	3	Q9BRZ2	E3 ubiquitin-protein ligase TRIM56 OS=Homo sapiens OX=9606 GN=TRIM56 PE=1 SV=3	101	RAGKPAcALCPLV
ylide_biotin	4	AVACHNFVK	2	Q9H8W3	Protein FAM204A OS=Homo sapiens OX=9606 GN=FAM204A PE=1 SV=1	192	IAKAVAcHNFVKA
ylide_biotin	9	GGLTSPIFCSTKPK	1	Q9ULL5	Proline-rich protein 12 OS=Homo sapiens OX=9606 GN=PRR12 PE=1 SV=3	1065	LTSPIFcSTKPKK
ylide_biotin	4	HAACPVLVGNK	1	P13674	Prolyl 4-hydroxylase subunit alpha-1 OS=Homo sapiens OX=9606 GN=P4HA1 PE=1 SV=2	503	STRHAAcPVLVGN
ylide_biotin	7	TWSPTACGGKK	1	Q15464	SH2 domain-containing adapter protein B OS=Homo sapiens OX=9606 GN=SHB PE=1 SV=2	215	TWSPTAcGGKKLL
ylide_biotin	3	SGCRRIVPGQFLAVDPK	2	Q15393	Splicing factor 3B subunit 3 OS=Homo sapiens OX=9606 GN=SF3B3 PE=1 SV=4	112	TFGKSGcRRIVPG
ylide_biotin	11	GNSPPSSGEACR	6	P41227	N-alpha-acetyltransferase 10 OS=Homo sapiens OX=9606 GN=NAA10 PE=1 SV=1	194	PSSGEAcREEKGL
ylide_biotin	3	SYCEHTAR	1	Q7Z7C8	Transcription initiation factor TFIID subunit 8 OS=Homo sapiens OX=9606 GN=TAF8 PE=1 SV=1	80	RSAKSYcEHTART
ylide_biotin	5	YSDHCEAR	1	C9JLR9	Zinc finger translocation-associated protein OS=Homo sapiens OX=9606 GN=ZFTA PE=1 SV=1	84	RKYSDHcEARASR
ylide_biotin	5	DTPGCATTPPHSQASSVR	2	Q15572	TATA box-binding protein-associated factor RNA polymerase I subunit C OS=Homo sapiens OX=9606 GN=TAF1C PE=1 SV=2	831	QRDTPGcATTPPH
ylide_biotin	6	IAAAKCR	1	P18847	Cyclic AMP-dependent transcription factor ATF-3 OS=Homo sapiens OX=9606 GN=ATF3 PE=1 SV=2	103	KIAAAKcRNKKKE
ylide_biotin	4	GSSCFECTHYQSFLEYR	1	P21964	Catechol O-methyltransferase OS=Homo sapiens OX=9606 GN=COMT PE=1 SV=2	238	HVRGSScFECTHY
ylide_biotin	11	KMRPGEATLSC	1	P57081	tRNA (guanine-N(7)-)-methyltransferase non-catalytic subunit WDR4 OS=Homo sapiens OX=9606 GN=WDR4 PE=1 SV=2	412	GEATLSc
ylide_biotin	4	CAACQNPR	1	P49792	E3 SUMO-protein ligase RanBP2 OS=Homo sapiens OX=9606 GN=RANBP2 PE=1 SV=2	1502	STKCAAcQNPRKQ
ylide_biotin	6	EGQWDCSSCLVR	1	P49792	E3 SUMO-protein ligase RanBP2 OS=Homo sapiens OX=9606 GN=RANBP2 PE=1 SV=2	1549	KEGQWDcSSCLVR
ylide_biotin	6	EGQWDCSVCLVR	2	P49792	E3 SUMO-protein ligase RanBP2 OS=Homo sapiens OX=9606 GN=RANBP2 PE=1 SV=2	1612	KEGQWDcSVCLVR
ylide_biotin	6	EGQWDCSVCLVR	2	P49792	E3 SUMO-protein ligase RanBP2 OS=Homo sapiens OX=9606 GN=RANBP2 PE=1 SV=2	1671	KEGQWDcSVCLVR
ylide_biotin	6	EGQWDCSVCLVR	2	P49792	E3 SUMO-protein ligase RanBP2 OS=Homo sapiens OX=9606 GN=RANBP2 PE=1 SV=2	1730	KEGQWDcSVCLVR
ylide_biotin	9	EGQWDCSVCLVRNEASATK	2	P49792	E3 SUMO-protein ligase RanBP2 OS=Homo sapiens OX=9606 GN=RANBP2 PE=1 SV=2	1615	QWDCSVcLVRNEA
ylide_biotin	9	EGQWDCSVCLVRNEASATK	2	P49792	E3 SUMO-protein ligase RanBP2 OS=Homo sapiens OX=9606 GN=RANBP2 PE=1 SV=2	1674	QWDCSVcLVRNEA
ylide_biotin	9	EGQWDCSVCLVRNEASATK	2	P49792	E3 SUMO-protein ligase RanBP2 OS=Homo sapiens OX=9606 GN=RANBP2 PE=1 SV=2	1733	QWDCSVcLVRNEA
ylide_biotin	4	ESPCGKIAVAVLEETTR	3	P49792	E3 SUMO-protein ligase RanBP2 OS=Homo sapiens OX=9606 GN=RANBP2 PE=1 SV=2	2464	TPRESPcGKIAVA
ylide_biotin	6	VGVGTCGIADKPMTQYQDTSK	3	O75940	Survival of motor neuron-related-splicing factor 30 OS=Homo sapiens OX=9606 GN=SMNDC1 PE=1 SV=1	214	KVGVGTcGIADKP
ylide_biotin	3	VKCVGLSAR	1	Q9Y5N6	Origin recognition complex subunit 6 OS=Homo sapiens OX=9606 GN=ORC6 PE=1 SV=1	35	RLSRVKcVGLSAR
ylide_biotin	5	HLRVCSLR	1	Q9H0A8	COMM domain-containing protein 4 OS=Homo sapiens OX=9606 GN=COMMD4 PE=1 SV=1	124	QKHLRVcSLRMNR
ylide_biotin	4	ITGCASPGK	1	P50991	T-complex protein 1 subunit delta OS=Homo sapiens OX=9606 GN=CCT4 PE=1 SV=4	379	LLKITGcASPGKT
ylide_biotin	7	SIHDALCVIR	1	P50991	T-complex protein 1 subunit delta OS=Homo sapiens OX=9606 GN=CCT4 PE=1 SV=4	410	SIHDALcVIRCLV
ylide_biotin	4	MEICSGSNK	2	Q15648	Mediator of RNA polymerase II transcription subunit 1 OS=Homo sapiens OX=9606 GN=MED1 PE=1 SV=4	681	SPRMEIcSGSNKT
ylide_biotin	9	ILLYACRNCDYQQEADNSCIYVNK	3	P36954	DNA-directed RNA polymerase II subunit RPB9 OS=Homo sapiens OX=9606 GN=POLR2I PE=1 SV=1	42	LYACRNcDYQQEA
ylide_biotin	10	LYYVCTAPHCGHR	2	P36954	DNA-directed RNA polymerase II subunit RPB9 OS=Homo sapiens OX=9606 GN=POLR2I PE=1 SV=1	119	VCTAPHcGHRWTE
ylide_biotin	6	TEDHPCQK	1	P36954	DNA-directed RNA polymerase II subunit RPB9 OS=Homo sapiens OX=9606 GN=POLR2I PE=1 SV=1	86	RTEDHPcQKCGHK
ylide_biotin	9	LQAANDSVCRLQQR	2	Q8TDH9	Biogenesis of lysosome-related organelles complex 1 subunit 5 OS=Homo sapiens OX=9606 GN=BLOC1S5 PE=1 SV=1	117	AANDSVcRLQQRE
ylide_biotin	12	MSGGGTETPVGCEAAPGGGSK	2	Q8TDH9	Biogenesis of lysosome-related organelles complex 1 subunit 5 OS=Homo sapiens OX=9606 GN=BLOC1S5 PE=1 SV=1	12	TETPVGcEAAPGG
ylide_biotin	10	ASAQDAGESCTPEAEGRPEEPCGEK	1	Q9H211	DNA replication factor Cdt1 OS=Homo sapiens OX=9606 GN=CDT1 PE=1 SV=3	151	QDAGEScTPEAEG
ylide_biotin	22	ASAQDAGESCTPEAEGRPEEPCGEKAPAYQR	1	Q9H211	DNA replication factor Cdt1 OS=Homo sapiens OX=9606 GN=CDT1 PE=1 SV=3	163	GRPEEPcGEKAPA
ylide_biotin	8	QLAQMTRCPEQEQR	1	Q9H211	DNA replication factor Cdt1 OS=Homo sapiens OX=9606 GN=CDT1 PE=1 SV=3	441	LAQMTRcPEQEQR
ylide_biotin	11	TVLTGTKDTVCSGVTSAVNVAK	1	Q96Q06	Perilipin-4 OS=Homo sapiens OX=9606 GN=PLIN4 PE=1 SV=2	522	GTKDTVcSGVTSA
ylide_biotin	5	VADYCENNYIQATDKR	1	Q8IZP0	Abl interactor 1 OS=Homo sapiens OX=9606 GN=ABI1 PE=1 SV=4	33	TRVADYcENNYIQ
ylide_biotin	9	GTRPAPGGCIQPR	2	Q96RR4	Calcium/calmodulin-dependent protein kinase kinase 2 OS=Homo sapiens OX=9606 GN=CAMKK2 PE=1 SV=2	223	RPAPGGcIQPRGP
ylide_biotin	5	AASKCQMMEER	2	Q96T51	RUN and FYVE domain-containing protein 1 OS=Homo sapiens OX=9606 GN=RUFY1 PE=1 SV=2	107	ARAASKcQMMEER
ylide_biotin	9	ATGNLSASCGSALR	3	Q96T51	RUN and FYVE domain-containing protein 1 OS=Homo sapiens OX=9606 GN=RUFY1 PE=1 SV=2	81	GNLSAScGSALRA
ylide_biotin	13	LQEELSAATDRICSLQEEQQQLR	1	Q96T51	RUN and FYVE domain-containing protein 1 OS=Homo sapiens OX=9606 GN=RUFY1 PE=1 SV=2	351	AATDRIcSLQEEQ
ylide_biotin	8	MADREGGCAAGR	4	Q96T51	RUN and FYVE domain-containing protein 1 OS=Homo sapiens OX=9606 GN=RUFY1 PE=1 SV=2	8	ADREGGcAAGRGR
ylide_biotin	13	VCDSCHTLLLQRCSSTAS	1	Q96T51	RUN and FYVE domain-containing protein 1 OS=Homo sapiens OX=9606 GN=RUFY1 PE=1 SV=2	703	TLLLQRcSSTAS
ylide_biotin	8	MQHQSQECKSEE	1	Q70CQ3	Ubiquitin carboxyl-terminal hydrolase 30 OS=Homo sapiens OX=9606 GN=USP30 PE=1 SV=1	513	QHQSQEcKSEE
ylide_biotin	5	ENRKCQEQAVSPK	1	Q5T7V8	RAB6-interacting golgin OS=Homo sapiens OX=9606 GN=GORAB PE=1 SV=2	329	AKENRKcQEQAVS
ylide_biotin	3	IKCVAFD	1	P09382	Galectin-1 OS=Homo sapiens OX=9606 GN=LGALS1 PE=1 SV=2	131	GDFKIKcVAFD
ylide_biotin	7	QVQSLTCEVDALK	13	P08670	Vimentin OS=Homo sapiens OX=9606 GN=VIM PE=1 SV=4	328	QVQSLTcEVDALK
ylide_biotin	7	ASNLLDCGARQEK	1	Q5THK1	Protein PRR14L OS=Homo sapiens OX=9606 GN=PRR14L PE=1 SV=1	1079	ASNLLDcGARQEK
ylide_biotin	13	MAQISSNSGFKECPSSHPEPTR	2	O00443	Phosphatidylinositol 4-phosphate 3-kinase C2 domain-containing subunit alpha OS=Homo sapiens OX=9606 GN=PIK3C2A PE=1 SV=2	13	NSGFKEcPSSHPE
ylide_biotin	10	LLQPDFQPVCASQLYPR	5	Q9UJW0	Dynactin subunit 4 OS=Homo sapiens OX=9606 GN=DCTN4 PE=1 SV=1	258	PDFQPVcASQLYP
ylide_biotin	4	SLECVSHEVDSHYCPSCLENMPSAEAK	2	Q9UJW0	Dynactin subunit 4 OS=Homo sapiens OX=9606 GN=DCTN4 PE=1 SV=1	41	ELRSLEcVSHEVD
ylide_biotin	4	RKPCSRPLSSILGR	2	P29353	SHC-transforming protein 1 OS=Homo sapiens OX=9606 GN=SHC1 PE=1 SV=4	212	TRRRKPcSRPLSS
ylide_biotin	10	MSTEGGGRRCQAQVSR	2	Q03393	6-pyruvoyl tetrahydrobiopterin synthase OS=Homo sapiens OX=9606 GN=PTS PE=1 SV=1	10	EGGGRRcQAQVSR
ylide_biotin	4	ILKCDEHIQK	1	Q9H3C7	Gametogenetin-binding protein 2 OS=Homo sapiens OX=9606 GN=GGNBP2 PE=1 SV=1	544	KSKILKcDEHIQK
ylide_biotin	6	VAFRDCEGR	4	Q16658	Fascin OS=Homo sapiens OX=9606 GN=FSCN1 PE=1 SV=3	226	KVAFRDcEGRYLA
ylide_biotin	17	EGQLNGSSAAHSEIRGCST	2	Q9BPY3	Protein FAM118B OS=Homo sapiens OX=9606 GN=FAM118B PE=1 SV=1	349	HSEIRGcST
ylide_biotin	5	TATVCGRELPDGPSPLLK	2	O14613	Cdc42 effector protein 2 OS=Homo sapiens OX=9606 GN=CDC42EP2 PE=1 SV=1	92	TRTATVcGRELPD
ylide_biotin	9	QLLPCEMACNEK	3	Q9NR45	Sialic acid synthase OS=Homo sapiens OX=9606 GN=NANS PE=1 SV=2	287	LPCEMAcNEKLGK
ylide_biotin	7	ALVDGPCTQVR	4	P50914	60S ribosomal protein L14 OS=Homo sapiens OX=9606 GN=RPL14 PE=1 SV=4	42	ALVDGPcTQVRRQ
ylide_biotin	4	LPFCGHK	1	Q9Y4P8	WD repeat domain phosphoinositide-interacting protein 2 OS=Homo sapiens OX=9606 GN=WIPI2 PE=1 SV=1	328	TVRLPFcGHKNIC
ylide_biotin	10	EIVHLQAGQCGNQIGAK	0	Q13885	Tubulin beta-2A chain OS=Homo sapiens OX=9606 GN=TUBB2A PE=1 SV=1	12	HIQAGQcGNQIGA
ylide_biotin	23	LTTPTYGDLNHLVSATMSGVTTCLRFPGQLNADLRK	2	Q13885	Tubulin beta-2A chain OS=Homo sapiens OX=9606 GN=TUBB2A PE=1 SV=1	239	MSGVTTcLRFPGQ
ylide_biotin	6	NMMAACDPR	12	Q13885	Tubulin beta-2A chain OS=Homo sapiens OX=9606 GN=TUBB2A PE=1 SV=1	303	KNMMAAcDPRHGR
ylide_biotin	18	NSSYFVEWIPNNVKTAVCDIPPR	10	Q13885	Tubulin beta-2A chain OS=Homo sapiens OX=9606 GN=TUBB2A PE=1 SV=1	354	NVKTAVcDIPPRG
ylide_biotin	5	NAELCEIPPTSDTK	2	Q92575	UBX domain-containing protein 4 OS=Homo sapiens OX=9606 GN=UBXN4 PE=1 SV=2	155	SRNAELcEIPPTS
ylide_biotin	22	SDTATGGESAGHATSSQEPSGCSDQRPAEDLNIR	2	Q92575	UBX domain-containing protein 4 OS=Homo sapiens OX=9606 GN=UBXN4 PE=1 SV=2	186	SQEPSGcSDQRPA
ylide_biotin	28	SETSVANGSQSESSVSTPSASFEPNNTCENSQSR	2	Q92575	UBX domain-containing protein 4 OS=Homo sapiens OX=9606 GN=UBXN4 PE=1 SV=2	144	FEPNNTcENSQSR
ylide_biotin	2	KCSASNR	11	P63220	40S ribosomal protein S21 OS=Homo sapiens OX=9606 GN=RPS21 PE=1 SV=1	17	LYVPRKcSASNRI
ylide_biotin	5	TYAICGAIR	10	P63220	40S ribosomal protein S21 OS=Homo sapiens OX=9606 GN=RPS21 PE=1 SV=1	56	FKTYAIcGAIRRM
ylide_biotin	6	DVGDTCSVGKKDEEQAALGQK	5	Q1ED39	Lysine-rich nucleolar protein 1 OS=Homo sapiens OX=9606 GN=KNOP1 PE=1 SV=1	184	RDVGDTcSVGKKD
ylide_biotin	16	GAQDPTAFSVQDPWFCEAREAR	1	Q1ED39	Lysine-rich nucleolar protein 1 OS=Homo sapiens OX=9606 GN=KNOP1 PE=1 SV=1	172	VQDPWFcEAREAR
ylide_biotin	6	GVSTLCEEHVEPETTLPAR	5	Q1ED39	Lysine-rich nucleolar protein 1 OS=Homo sapiens OX=9606 GN=KNOP1 PE=1 SV=1	78	KGVSTLcEEHVEP
ylide_biotin	12	ICARPFTVFRWCPGVR	2	Q9NW64	Pre-mRNA-splicing factor RBM22 OS=Homo sapiens OX=9606 GN=RBM22 PE=1 SV=1	58	FTVFRWcPGVRMR
ylide_biotin	6	VTQHKCYIVATVDR	1	Q9Y324	rRNA-processing protein FCF1 homolog OS=Homo sapiens OX=9606 GN=FCF1 PE=1 SV=1	154	RVTQHKcYIVATV
ylide_biotin	6	LRPTVCGVEELRR	2	Q96DC7	Transmembrane and coiled-coil domain-containing protein 6 OS=Homo sapiens OX=9606 GN=TMCO6 PE=1 SV=2	14	RLRPTVcGVEELR
ylide_biotin	11	GAVEKGEELSCEER	13	P31947	14-3-3 protein sigma OS=Homo sapiens OX=9606 GN=SFN PE=1 SV=1	38	KGEELScEERNLL
ylide_biotin	4	ITDCPKLEAMQTK	1	Q9UJV9	Probable ATP-dependent RNA helicase DDX41 OS=Homo sapiens OX=9606 GN=DDX41 PE=1 SV=2	595	GHRITDcPKLEAM
ylide_biotin	9	LALFNPDVCWDRNNPEPWNK	2	O00483	Cytochrome c oxidase subunit NDUFA4 OS=Homo sapiens OX=9606 GN=NDUFA4 PE=1 SV=1	44	LFNPDVcWDRNNP
ylide_biotin	6	ILCEQCMTSNQK	2	Q8WXI9	Transcriptional repressor p66-beta OS=Homo sapiens OX=9606 GN=GATAD2B PE=1 SV=1	444	KILCEQcMTSNQK
ylide_biotin	4	KPQCKVCR	1	P56192	Methionine--tRNA ligase, cytoplasmic OS=Homo sapiens OX=9606 GN=MARS1 PE=1 SV=2	435	ELKKPQcKVCRSC
ylide_biotin	10	APPELPERNCGYREVEYWDQR	1	P0DPD7	EEF1A lysine methyltransferase 4 OS=Homo sapiens OX=9606 GN=EEF1AKMT4 PE=1 SV=1	18	ELPERNcGYREVE
ylide_biotin	4	TSACFEPSLDYMVTK	1	P31327	Carbamoyl-phosphate synthase [ammonia], mitochondrial OS=Homo sapiens OX=9606 GN=CPS1 PE=1 SV=2	761	SGKTSAcFEPSLD
ylide_biotin	6	VVAVDCGIKNNVIR	2	P31327	Carbamoyl-phosphate synthase [ammonia], mitochondrial OS=Homo sapiens OX=9606 GN=CPS1 PE=1 SV=2	225	KVVAVDcGIKNNV
ylide_biotin	17	FLTPCYHPNVDTQGNICLDILKEK	1	O00762	Ubiquitin-conjugating enzyme E2 C OS=Homo sapiens OX=9606 GN=UBE2C PE=1 SV=1	114	DTQGNIcLDILKE
ylide_biotin	4	AHGCFQDGR	1	Q9H1B7	Probable E3 ubiquitin-protein ligase IRF2BPL OS=Homo sapiens OX=9606 GN=IRF2BPL PE=1 SV=1	63	LKRAHGcFQDGRS
ylide_biotin	9	LEDTHFVQCPSVPSHK	1	Q9H1B7	Probable E3 ubiquitin-protein ligase IRF2BPL OS=Homo sapiens OX=9606 GN=IRF2BPL PE=1 SV=1	730	DTHFVQcPSVPSH
ylide_biotin	6	QSCYLCDLPR	3	Q9H1B7	Probable E3 ubiquitin-protein ligase IRF2BPL OS=Homo sapiens OX=9606 GN=IRF2BPL PE=1 SV=1	17	RQSCYLcDLPRMP
ylide_biotin	8	MAMWNRPCQRLPQQPLVAEPTAEGEPHLPTGR	3	Q5TGY1	Transmembrane and coiled-coil domain-containing protein 4 OS=Homo sapiens OX=9606 GN=TMCO4 PE=1 SV=1	8	AMWNRPcQRLPQQ
ylide_biotin	5	AGGGCVMTIGEMLR	2	Q5VTL8	Pre-mRNA-splicing factor 38B OS=Homo sapiens OX=9606 GN=PRPF38B PE=1 SV=1	196	VKAGGGcVMTIGE
ylide_biotin	9	KTAGQTGMCGGVR	4	Q5VTL8	Pre-mRNA-splicing factor 38B OS=Homo sapiens OX=9606 GN=PRPF38B PE=1 SV=1	113	AGQTGMcGGVRGV
ylide_biotin	29	MANNSPALTGNSQPQHQAAAAAAQQQQQCGGGGATKPAVSGK	1	Q5VTL8	Pre-mRNA-splicing factor 38B OS=Homo sapiens OX=9606 GN=PRPF38B PE=1 SV=1	29	AQQQQQcGGGGAT
ylide_biotin	4	SQACEPSEPEIEIK	5	P26358	DNA (cytosine-5)-methyltransferase 1 OS=Homo sapiens OX=9606 GN=DNMT1 PE=1 SV=2	1125	KPKSQAcEPSEPE
ylide_biotin	8	GSKDTDICSSAK	1	Q8NFC6	Biorientation of chromosomes in cell division protein 1-like 1 OS=Homo sapiens OX=9606 GN=BOD1L1 PE=1 SV=2	1947	SKDTDIcSSAKGI
ylide_biotin	9	KETEGTVTCTGAEGR	2	Q8NFC6	Biorientation of chromosomes in cell division protein 1-like 1 OS=Homo sapiens OX=9606 GN=BOD1L1 PE=1 SV=2	1729	TEGTVTcTGAEGR
ylide_biotin	26	IEANVNSVVTEEKDDAVTSAGSEEKCDGSLSR	1	Q8NFC6	Biorientation of chromosomes in cell division protein 1-like 1 OS=Homo sapiens OX=9606 GN=BOD1L1 PE=1 SV=2	1663	AGSEEKcDGSLSR
ylide_biotin	8	QSEVALPCTSIEADEGLIIGTHSR	1	Q8NFC6	Biorientation of chromosomes in cell division protein 1-like 1 OS=Homo sapiens OX=9606 GN=BOD1L1 PE=1 SV=2	1554	SEVALPcTSIEAD
ylide_biotin	7	SDNFVICSVTGAGPREER	2	Q8NFC6	Biorientation of chromosomes in cell division protein 1-like 1 OS=Homo sapiens OX=9606 GN=BOD1L1 PE=1 SV=2	1742	SDNFVIcSVTGAG
ylide_biotin	2	TCTADSK	3	Q8NFC6	Biorientation of chromosomes in cell division protein 1-like 1 OS=Homo sapiens OX=9606 GN=BOD1L1 PE=1 SV=2	1170	KDELRTcTADSKA
ylide_biotin	5	TSEHCEKEK	1	Q8NFC6	Biorientation of chromosomes in cell division protein 1-like 1 OS=Homo sapiens OX=9606 GN=BOD1L1 PE=1 SV=2	607	LKTSEHcEKEKIS
ylide_biotin	6	TSTTKCITGQESK	3	Q8NFC6	Biorientation of chromosomes in cell division protein 1-like 1 OS=Homo sapiens OX=9606 GN=BOD1L1 PE=1 SV=2	2570	KTSTTKcITGQES
ylide_biotin	10	VYQGQQPGTCMGSKR	1	Q9UIF7	Adenine DNA glycosylase OS=Homo sapiens OX=9606 GN=MUTYH PE=1 SV=1	502	GQQPGTcMGSKRS
ylide_biotin	4	LGRCESQSTLDPGAGEAR	1	Q15818	Neuronal pentraxin-1 OS=Homo sapiens OX=9606 GN=NPTX1 PE=1 SV=2	89	TAKLGRcESQSTL
ylide_biotin	5	KMIFCSR	2	Q01718	Adrenocorticotropic hormone receptor OS=Homo sapiens OX=9606 GN=MC2R PE=1 SV=1	293	FKKMIFcSRYW
ylide_biotin	8	LIEDGRGCEVIQEIK	1	P10155	60 kDa SS-A/Ro ribonucleoprotein OS=Homo sapiens OX=9606 GN=RO60 PE=1 SV=2	71	IEDGRGcEVIQEI
ylide_biotin	6	KGEKPCALEK	2	P46100	Transcriptional regulator ATRX OS=Homo sapiens OX=9606 GN=ATRX PE=1 SV=5	450	RKGEKPcALEKKD
ylide_biotin	6	KTSSNCNGEEK	2	P46100	Transcriptional regulator ATRX OS=Homo sapiens OX=9606 GN=ATRX PE=1 SV=5	324	KKTSSNcNGEEKK
ylide_biotin	13	TYDPSGDSTLPTCSKK	5	Q9Y2X3	Nucleolar protein 58 OS=Homo sapiens OX=9606 GN=NOP58 PE=1 SV=1	439	DSTLPTcSKKRKI
ylide_biotin	9	AGSPDVLRCSSQGHR	1	Q8NDX6	Zinc finger protein 740 OS=Homo sapiens OX=9606 GN=ZNF740 PE=1 SV=1	50	SPDVLRcSSQGHR
ylide_biotin	4	CHQCFSR	2	Q8NDX6	Zinc finger protein 740 OS=Homo sapiens OX=9606 GN=ZNF740 PE=1 SV=1	165	CERCHQcFSRTDR
ylide_biotin	7	NFVCEHCFGAFR	1	Q8NDX6	Zinc finger protein 740 OS=Homo sapiens OX=9606 GN=ZNF740 PE=1 SV=1	106	NFVCEHcFGAFRS
ylide_biotin	6	RMCQGCQSK	1	Q8NDX6	Zinc finger protein 740 OS=Homo sapiens OX=9606 GN=ZNF740 PE=1 SV=1	182	KRMCQGcQSKTSD
ylide_biotin	10	SEHQNSSPTCQEDEEDVR	2	Q9NP74	Palmdelphin OS=Homo sapiens OX=9606 GN=PALMD PE=1 SV=1	388	QNSSPTcQEDEED
ylide_biotin	15	MPSETPQAEVGPTGCPHR	4	P35520	Cystathionine beta-synthase OS=Homo sapiens OX=9606 GN=CBS PE=1 SV=2	15	EVGPTGcPHRSGP
ylide_biotin	13	HHSQQAPQAEAPCLLR	4	Q9C0I1	Myotubularin-related protein 12 OS=Homo sapiens OX=9606 GN=MTMR12 PE=1 SV=2	694	PQAEAPcLLRNSA
ylide_biotin	7	YVQEDSCQHGVYGR	2	Q9C0I1	Myotubularin-related protein 12 OS=Homo sapiens OX=9606 GN=MTMR12 PE=1 SV=2	67	YVQEDScQHGVYG
ylide_biotin	12	ESSPEKEAEEGCPEKESEEGCPK	3	O43719	HIV Tat-specific factor 1 OS=Homo sapiens OX=9606 GN=HTATSF1 PE=1 SV=1	462	KEAEEGcPEKESE
ylide_biotin	7	RGFEGSCSQKESEEGNPVR	1	O43719	HIV Tat-specific factor 1 OS=Homo sapiens OX=9606 GN=HTATSF1 PE=1 SV=1	480	RGFEGScSQKESE
ylide_biotin	6	TLKNDCEENGLAK	1	O43719	HIV Tat-specific factor 1 OS=Homo sapiens OX=9606 GN=HTATSF1 PE=1 SV=1	512	KTLKNDcEENGLA
ylide_biotin	6	LPSWDCPHPR	1	O76076	CCN family member 5 OS=Homo sapiens OX=9606 GN=CCN5 PE=1 SV=1	145	RLPSWDcPHPRRV
ylide_biotin	3	RLCLSRPCPPSR	1	O76076	CCN family member 5 OS=Homo sapiens OX=9606 GN=CCN5 PE=1 SV=1	232	ETQRRLcLSRPCP
ylide_biotin	5	GREKCSAGSQK	2	Q8WZA9	Immunity-related GTPase family Q protein OS=Homo sapiens OX=9606 GN=IRGQ PE=1 SV=1	373	SKGREKcSAGSQK
ylide_biotin	10	TDGEGEDPECLGEGKMENPKGESLK	1	Q8WZA9	Immunity-related GTPase family Q protein OS=Homo sapiens OX=9606 GN=IRGQ PE=1 SV=1	340	EGEDPEcLGEGKM
ylide_biotin	5	HVSVCR	1	Q9NX58	Cell growth-regulating nucleolar protein OS=Homo sapiens OX=9606 GN=LYAR PE=1 SV=2	25	EKHVSVcRNCECL
ylide_biotin	9	MVFFTCNACGESVK	6	Q9NX58	Cell growth-regulating nucleolar protein OS=Homo sapiens OX=9606 GN=LYAR PE=1 SV=2	9	FFTCNAcGESVKK
ylide_biotin	4	NCECLSCIDCGK	3	Q9NX58	Cell growth-regulating nucleolar protein OS=Homo sapiens OX=9606 GN=LYAR PE=1 SV=2	30	VCRNCEcLSCIDC
ylide_biotin	4	AVACSKYEEDVK	1	O95391	Pre-mRNA-splicing factor SLU7 OS=Homo sapiens OX=9606 GN=SLU7 PE=1 SV=2	416	QERAVAcSKYEED
ylide_biotin	5	ELAGCGSR	1	Q4G0N4	NAD kinase 2, mitochondrial OS=Homo sapiens OX=9606 GN=NADK2 PE=1 SV=2	58	PRELAGcGSRADG
ylide_biotin	19	ATASSSAQEMEQQLAERECPPHAEQR	1	Q9H9Q2	COP9 signalosome complex subunit 7b OS=Homo sapiens OX=9606 GN=COPS7B PE=1 SV=1	240	QLAEREcPPHAEQ
ylide_biotin	5	AGKLCVPAMNVNDSVTK	1	O43865	S-adenosylhomocysteine hydrolase-like protein 1 OS=Homo sapiens OX=9606 GN=AHCYL1 PE=1 SV=2	272	SKAGKLcVPAMNV
ylide_biotin	6	GSSNFCVKNIK	1	O43865	S-adenosylhomocysteine hydrolase-like protein 1 OS=Homo sapiens OX=9606 GN=AHCYL1 PE=1 SV=2	106	KGSSNFcVKNIKQ
ylide_biotin	11	AGEAEESSAVCQVDAEQR	1	Q8N3D4	EH domain-binding protein 1-like protein 1 OS=Homo sapiens OX=9606 GN=EHBP1L1 PE=1 SV=2	422	EESSAVcQVDAEQ
ylide_biotin	11	QFLDFGSSNACEKTSFTFLR	2	Q15119	[Pyruvate dehydrogenase (acetyl-transferring)] kinase isozyme 2, mitochondrial OS=Homo sapiens OX=9606 GN=PDK2 PE=1 SV=2	45	FGSSNAcEKTSFT
ylide_biotin	12	TNVPDFFYCQKCKELRPEAR	1	Q9BUL5	PHD finger protein 23 OS=Homo sapiens OX=9606 GN=PHF23 PE=1 SV=1	384	FFYCQKcKELRPE
ylide_biotin	14	ADQGDGPEGSGRACSTVEGK	1	Q96RL1	BRCA1-A complex subunit RAP80 OS=Homo sapiens OX=9606 GN=UIMC1 PE=1 SV=2	601	EGSGRAcSTVEGK
ylide_biotin	9	AIAESLNSCRPSDASATR	2	Q96RL1	BRCA1-A complex subunit RAP80 OS=Homo sapiens OX=9606 GN=UIMC1 PE=1 SV=2	121	AESLNScRPSDAS
ylide_biotin	12	AVQGSGDTSRHCLPTLADAK	1	Q96RL1	BRCA1-A complex subunit RAP80 OS=Homo sapiens OX=9606 GN=UIMC1 PE=1 SV=2	257	GDTSRHcLPTLAD
ylide_biotin	9	EYQCHVDSCLQLAK	3	Q96RL1	BRCA1-A complex subunit RAP80 OS=Homo sapiens OX=9606 GN=UIMC1 PE=1 SV=2	582	QCHVDScLQLAKA
ylide_biotin	11	SFVSISEATDCLVDFKK	1	Q96RL1	BRCA1-A complex subunit RAP80 OS=Homo sapiens OX=9606 GN=UIMC1 PE=1 SV=2	691	ISEATDcLVDFKK
ylide_biotin	10	LASEKEVVECQSTSTVGGQSVK	1	Q96T23	Remodeling and spacing factor 1 OS=Homo sapiens OX=9606 GN=RSF1 PE=1 SV=2	650	EKEVVEcQSTSTV
ylide_biotin	9	TALSSTESCTMKGEEK	1	Q96T23	Remodeling and spacing factor 1 OS=Homo sapiens OX=9606 GN=RSF1 PE=1 SV=2	562	LSSTEScTMKGEE
ylide_biotin	4	ARACSEQEGR	1	O14662	Syntaxin-16 OS=Homo sapiens OX=9606 GN=STX16 PE=1 SV=3	150	PSRARAcSEQEGR
ylide_biotin	6	GAGLSCEQLK	1	Q8TEA1	tRNA (cytosine(72)-C(5))-methyltransferase NSUN6 OS=Homo sapiens OX=9606 GN=NSUN6 PE=1 SV=1	415	RGAGLScEQLKQL
ylide_biotin	7	AKFSAACGPPVTPECEHCGQR	1	Q9NXH9	tRNA (guanine(26)-N(2))-dimethyltransferase OS=Homo sapiens OX=9606 GN=TRMT1 PE=1 SV=1	376	AKFSAAcGPPVTP
ylide_biotin	7	VVTQNICQYR	1	Q8N163	Cell cycle and apoptosis regulator protein 2 OS=Homo sapiens OX=9606 GN=CCAR2 PE=1 SV=2	754	VVTQNIcQYRSLQ
ylide_biotin	5	NAEDCLYELPENIR	2	Q9NZ63	Telomere length and silencing protein 1 homolog OS=Homo sapiens OX=9606 GN=C9orf78 PE=1 SV=1	145	PKNAEDcLYELPE
ylide_biotin	11	KDLLVENVPYCDAPTQKQ	5	Q5U5X0	Complex III assembly factor LYRM7 OS=Homo sapiens OX=9606 GN=LYRM7 PE=1 SV=1	97	VENVPYcDAPTQK
ylide_biotin	9	LKPEYDIMCKVK	1	Q9NTK5	Obg-like ATPase 1 OS=Homo sapiens OX=9606 GN=OLA1 PE=1 SV=2	187	PEYDIMcKVKSWV
ylide_biotin	8	KLAVSSAC	1	Q15437	Protein transport protein Sec23B OS=Homo sapiens OX=9606 GN=SEC23B PE=1 SV=2	767	LAVSSAc
ylide_biotin	9	MVQVHELSCEGISK	1	Q15437	Protein transport protein Sec23B OS=Homo sapiens OX=9606 GN=SEC23B PE=1 SV=2	180	QVHELScEGISKS
ylide_biotin	8	SLPGPAPCLKHFPLDLR	5	Q01433	AMP deaminase 2 OS=Homo sapiens OX=9606 GN=AMPD2 PE=1 SV=2	107	LPGPAPcLKHFPL
ylide_biotin	9	VTISGEEKCGVPFTDLLDAAK	1	Q01433	AMP deaminase 2 OS=Homo sapiens OX=9606 GN=AMPD2 PE=1 SV=2	230	ISGEEKcGVPFTD
ylide_biotin	8	HTLDGAACLLNSNKYFPSR	1	Q9Y3A3	MOB-like protein phocein OS=Homo sapiens OX=9606 GN=MOB4 PE=1 SV=1	134	TLDGAAcLLNSNK
ylide_biotin	5	TPKECPAIDYTR	1	Q9Y3A3	MOB-like protein phocein OS=Homo sapiens OX=9606 GN=MOB4 PE=1 SV=1	119	HKTPKEcPAIDYT
ylide_biotin	5	AVHQCDRGWAPVFLDR	2	Q9Y5Y2	Cytosolic Fe-S cluster assembly factor NUBP2 OS=Homo sapiens OX=9606 GN=NUBP2 PE=1 SV=1	72	GRAVHQcDRGWAP
ylide_biotin	5	ELTFCRKTGLR	1	Q9Y5Y2	Cytosolic Fe-S cluster assembly factor NUBP2 OS=Homo sapiens OX=9606 GN=NUBP2 PE=1 SV=1	177	RRELTFcRKTGLR
ylide_biotin	8	ILDATPACLP	5	Q9Y5Y2	Cytosolic Fe-S cluster assembly factor NUBP2 OS=Homo sapiens OX=9606 GN=NUBP2 PE=1 SV=1	269	LDATPAcLP
ylide_biotin	9	VGILDVDLCGPSIPR	4	Q9Y5Y2	Cytosolic Fe-S cluster assembly factor NUBP2 OS=Homo sapiens OX=9606 GN=NUBP2 PE=1 SV=1	54	ILDVDLcGPSIPR
ylide_biotin	19	VMGIVENMSGFTCPHCTECTSVFSR	1	Q9Y5Y2	Cytosolic Fe-S cluster assembly factor NUBP2 OS=Homo sapiens OX=9606 GN=NUBP2 PE=1 SV=1	202	CPHCTEcTSVFSR
ylide_biotin	7	YYQKGYCAYGTR	1	Q9H000	Probable E3 ubiquitin-protein ligase makorin-2 OS=Homo sapiens OX=9606 GN=MKRN2 PE=1 SV=2	45	YYQKGYcAYGTRC
ylide_biotin	3	FTCVSNLNVHR	1	Q499Z4	Zinc finger protein 672 OS=Homo sapiens OX=9606 GN=ZNF672 PE=1 SV=2	350	CGKRFTcVSNLNV
ylide_biotin	9	GNIDGNVSCSENLVANTAR	1	Q92576	PHD finger protein 3 OS=Homo sapiens OX=9606 GN=PHF3 PE=1 SV=3	1631	IDGNVScSENLVA
ylide_biotin	9	LCSAEKNSCVQQSDNLK	2	Q92576	PHD finger protein 3 OS=Homo sapiens OX=9606 GN=PHF3 PE=1 SV=3	1709	SAEKNScVQQSDN
ylide_biotin	4	IQSCNSGVK	2	Q92576	PHD finger protein 3 OS=Homo sapiens OX=9606 GN=PHF3 PE=1 SV=3	561	EPKIQScNSGVKS
ylide_biotin	9	NKIEPLGYCEDAESNR	1	Q92576	PHD finger protein 3 OS=Homo sapiens OX=9606 GN=PHF3 PE=1 SV=3	402	IEPLGYcEDAESN
ylide_biotin	5	NSSDCRDNEIKK	1	Q92576	PHD finger protein 3 OS=Homo sapiens OX=9606 GN=PHF3 PE=1 SV=3	843	GRNSSDcRDNEIK
ylide_biotin	10	EIVHLQAGQCGNQIGAK	0	Q13509	Tubulin beta-3 chain OS=Homo sapiens OX=9606 GN=TUBB3 PE=1 SV=2	12	HIQAGQcGNQIGA
ylide_biotin	6	NMMAACDPR	12	Q13509	Tubulin beta-3 chain OS=Homo sapiens OX=9606 GN=TUBB3 PE=1 SV=2	303	KNMMAAcDPRHGR
ylide_biotin	11	ILPMAGRDPECQRTEMIK	1	Q8WVC0	RNA polymerase-associated protein LEO1 OS=Homo sapiens OX=9606 GN=LEO1 PE=1 SV=1	530	AGRDPEcQRTEMI
ylide_biotin	9	MTLSLADRCSK	3	Q8WVC0	RNA polymerase-associated protein LEO1 OS=Homo sapiens OX=9606 GN=LEO1 PE=1 SV=1	512	LSLADRcSKTQKI
ylide_biotin	2	ACIACR	4	Q99615	DnaJ homolog subfamily C member 7 OS=Homo sapiens OX=9606 GN=DNAJC7 PE=1 SV=2	247	PDHEKAcIACRNA
ylide_biotin	5	ACIACRNAK	1	Q99615	DnaJ homolog subfamily C member 7 OS=Homo sapiens OX=9606 GN=DNAJC7 PE=1 SV=2	250	EKACIAcRNAKAL
ylide_biotin	5	AIDMCPKNASYYGNR	1	Q99615	DnaJ homolog subfamily C member 7 OS=Homo sapiens OX=9606 GN=DNAJC7 PE=1 SV=2	58	TKAIDMcPKNASY
ylide_biotin	7	MAAAAECDVVMAATEPELLDDQEAKR	2	Q99615	DnaJ homolog subfamily C member 7 OS=Homo sapiens OX=9606 GN=DNAJC7 PE=1 SV=2	7	MAAAAEcDVVMAA
ylide_biotin	9	GGGSCVLCCGDLEATALGR	1	Q86UK7	E3 ubiquitin-protein ligase ZNF598 OS=Homo sapiens OX=9606 GN=ZNF598 PE=1 SV=1	33	GSCVLCcGDLEAT
ylide_biotin	17	LKDEDFPSLSASTSSSCSTAATPGPVGLALPYAIPAR	2	Q86UK7	E3 ubiquitin-protein ligase ZNF598 OS=Homo sapiens OX=9606 GN=ZNF598 PE=1 SV=1	456	ASTSSScSTAATP
ylide_biotin	5	MRVLCEQR	1	Q86UK7	E3 ubiquitin-protein ligase ZNF598 OS=Homo sapiens OX=9606 GN=ZNF598 PE=1 SV=1	60	TKMRVLcEQRYCA
ylide_biotin	3	TACHSR	3	Q86UK7	E3 ubiquitin-protein ligase ZNF598 OS=Homo sapiens OX=9606 GN=ZNF598 PE=1 SV=1	269	KAHRTAcHSRSRA
ylide_biotin	6	MELGSCLEGGREAAEEEGEPEVK	2	O95551	Tyrosyl-DNA phosphodiesterase 2 OS=Homo sapiens OX=9606 GN=TDP2 PE=1 SV=1	6	MELGScLEGGRE
ylide_biotin	20	TELQGLIGQLDEVSLEKNPCIREAR	1	Q9UL15	BAG family molecular chaperone regulator 5 OS=Homo sapiens OX=9606 GN=BAG5 PE=1 SV=1	327	SLEKNPcIREARR
ylide_biotin	9	SQKPEAGGCGAPAAR	1	O60343	TBC1 domain family member 4 OS=Homo sapiens OX=9606 GN=TBC1D4 PE=1 SV=2	74	KPEAGGcGAPAAR
ylide_biotin	7	TKEYTACELMNIYK	3	Q9NSD9	Phenylalanine--tRNA ligase beta subunit OS=Homo sapiens OX=9606 GN=FARSB PE=1 SV=3	195	TKEYTAcELMNIY
ylide_biotin	2	ACAAGTPAVIR	5	P51610	Host cell factor 1 OS=Homo sapiens OX=9606 GN=HCFC1 PE=1 SV=2	1139	RDARRAcAAGTPA
ylide_biotin	12	GPFSEISAFKTCLPGFPGAPCAIK	1	P51610	Host cell factor 1 OS=Homo sapiens OX=9606 GN=HCFC1 PE=1 SV=2	1886	ISAFKTcLPGFPG
ylide_biotin	7	VAGINACGRGPFSEISAFK	6	P51610	Host cell factor 1 OS=Homo sapiens OX=9606 GN=HCFC1 PE=1 SV=2	1872	VAGINAcGRGPFS
ylide_biotin	10	DTQTSITDSCAVYRVNNNR	1	Q9Y5M8	Signal recognition particle receptor subunit beta OS=Homo sapiens OX=9606 GN=SRPRB PE=1 SV=3	100	TSITDScAVYRVN
ylide_biotin	10	QDEHGYISRCFTR	4	P04792	Heat shock protein beta-1 OS=Homo sapiens OX=9606 GN=HSPB1 PE=1 SV=2	137	HGYISRcFTRKYT
ylide_biotin	17	DLEAEHVEVEDTTLNRCSCSFR	5	Q9H3K6	BolA-like protein 2 OS=Homo sapiens OX=9606 GN=BOLA2 PE=1 SV=1	31	DTTLNRcSCSFRV
ylide_biotin	11	GADQKPTSADCAVR	1	Q8IX01	SURP and G-patch domain-containing protein 2 OS=Homo sapiens OX=9606 GN=SUGP2 PE=1 SV=2	656	KPTSADcAVRAML
ylide_biotin	6	LIEKECLEKESR	1	Q8IX01	SURP and G-patch domain-containing protein 2 OS=Homo sapiens OX=9606 GN=SUGP2 PE=1 SV=2	183	RLIEKEcLEKESR
ylide_biotin	3	RVCLIQEPK	5	Q8IX01	SURP and G-patch domain-containing protein 2 OS=Homo sapiens OX=9606 GN=SUGP2 PE=1 SV=2	970	PAPKRVcLIQEPK
ylide_biotin	6	FCTMSCAKR	3	Q8NDX5	Polyhomeotic-like protein 3 OS=Homo sapiens OX=9606 GN=PHC3 PE=1 SV=1	808	RFCTMScAKRYNV
ylide_biotin	14	KRPLLDNQVINSVCVQPELQNNTK	2	Q8NDX5	Polyhomeotic-like protein 3 OS=Homo sapiens OX=9606 GN=PHC3 PE=1 SV=1	746	QVINSVcVQPELQ
ylide_biotin	6	RYNVSCSKK	1	Q8NDX5	Polyhomeotic-like protein 3 OS=Homo sapiens OX=9606 GN=PHC3 PE=1 SV=1	816	KRYNVScSKKFAL
ylide_biotin	12	SMSVDETDKSPCEAGR	4	Q53SF7	Cordon-bleu protein-like 1 OS=Homo sapiens OX=9606 GN=COBLL1 PE=1 SV=3	335	ETDKSPcEAGRVR
ylide_biotin	2	DCGGAAQLAGPAAEADPLGR	8	Q9Y508	E3 ubiquitin-protein ligase RNF114 OS=Homo sapiens OX=9606 GN=RNF114 PE=1 SV=1	8	AAQQRDcGGAAQL
ylide_biotin	4	KPVCGVCR	1	Q9Y508	E3 ubiquitin-protein ligase RNF114 OS=Homo sapiens OX=9606 GN=RNF114 PE=1 SV=1	64	KPKKPVcGVCRSA
ylide_biotin	7	KPVCGVCRSALAPGVR	2	Q9Y508	E3 ubiquitin-protein ligase RNF114 OS=Homo sapiens OX=9606 GN=RNF114 PE=1 SV=1	67	KPVCGVcRSALAP
ylide_biotin	13	NVPNRYTFPCPYCPEKNFDQEGLVEHCK	1	Q9Y508	E3 ubiquitin-protein ligase RNF114 OS=Homo sapiens OX=9606 GN=RNF114 PE=1 SV=1	146	TFPCPYcPEKNFD
ylide_biotin	6	SHVATCSK	12	Q9Y508	E3 ubiquitin-protein ligase RNF114 OS=Homo sapiens OX=9606 GN=RNF114 PE=1 SV=1	110	RSHVATcSKYQNY
ylide_biotin	7	KEQGGGCHSDT	1	O60353	Frizzled-6 OS=Homo sapiens OX=9606 GN=FZD6 PE=1 SV=2	702	KEQGGGcHSDT
ylide_biotin	6	LREQDCGEPASPAASISR	1	O60353	Frizzled-6 OS=Homo sapiens OX=9606 GN=FZD6 PE=1 SV=2	615	RLREQDcGEPASP
ylide_biotin	8	GPQERTPCGPALR	2	Q86W50	RNA N6-adenosine-methyltransferase METTL16 OS=Homo sapiens OX=9606 GN=METTL16 PE=1 SV=2	432	PQERTPcGPALRE
ylide_biotin	7	VTYTEFCQGR	1	Q86W50	RNA N6-adenosine-methyltransferase METTL16 OS=Homo sapiens OX=9606 GN=METTL16 PE=1 SV=2	276	VTYTEFcQGRTMR
ylide_biotin	5	MAAQCVTK	2	O75131	Copine-3 OS=Homo sapiens OX=9606 GN=CPNE3 PE=1 SV=1	5	MAAQcVTKVAL
ylide_biotin	5	ASGRCVIAPVR	1	Q9NXH8	Torsin-4A OS=Homo sapiens OX=9606 GN=TOR4A PE=1 SV=2	21	PRASGRcVIAPVR
ylide_biotin	5	QELLCAFWK	1	P48960	Adhesion G protein-coupled receptor E5 OS=Homo sapiens OX=9606 GN=ADGRE5 PE=1 SV=4	495	PRQELLcAFWKSD
ylide_biotin	6	AQMKVCSLSNQR	1	P28290	Protein ITPRID2 OS=Homo sapiens OX=9606 GN=ITPRID2 PE=1 SV=3	703	RAQMKVcSLSNQR
ylide_biotin	5	AWAKCR	1	P28290	Protein ITPRID2 OS=Homo sapiens OX=9606 GN=ITPRID2 PE=1 SV=3	30	RKAWAKcRSSWQA
ylide_biotin	9	SGSQDFPQCNTIENTGTK	1	P28290	Protein ITPRID2 OS=Homo sapiens OX=9606 GN=ITPRID2 PE=1 SV=3	599	SQDFPQcNTIENT
ylide_biotin	12	SVHISTPEKEPCAPLTIPSIR	2	P28290	Protein ITPRID2 OS=Homo sapiens OX=9606 GN=ITPRID2 PE=1 SV=3	448	TPEKEPcAPLTIP
ylide_biotin	15	TLSTHSVPNISGATCSAFASPFGCPYSHR	1	P28290	Protein ITPRID2 OS=Homo sapiens OX=9606 GN=ITPRID2 PE=1 SV=3	878	NISGATcSAFASP
ylide_biotin	7	SHYNINCNSTR	4	Q9NSV4	Protein diaphanous homolog 3 OS=Homo sapiens OX=9606 GN=DIAPH3 PE=1 SV=4	1125	SHYNINcNSTRTP
ylide_biotin	12	FSVCVLGDQQHCDEAK	1	P62906	60S ribosomal protein L10a OS=Homo sapiens OX=9606 GN=RPL10A PE=1 SV=2	74	LGDQQHcDEAKAV
ylide_biotin	9	MASTSYDYCRVPMEDGDKR	1	Q10589	Bone marrow stromal antigen 2 OS=Homo sapiens OX=9606 GN=BST2 PE=1 SV=1	9	STSYDYcRVPMED
ylide_biotin	20	SGGVGDPREPLGCLQEGSGCHPTTESFEK	1	Q8NCE0	tRNA-splicing endonuclease subunit Sen2 OS=Homo sapiens OX=9606 GN=TSEN2 PE=1 SV=2	199	LQEGSGcHPTTES
ylide_biotin	7	DYEQPTCAKVENAQFK	2	Q9UK61	Protein TASOR OS=Homo sapiens OX=9606 GN=TASOR PE=1 SV=3	830	DYEQPTcAKVENA
ylide_biotin	3	ALCATRQEPLLIGSTK	1	P49327	Fatty acid synthase OS=Homo sapiens OX=9606 GN=FASN PE=1 SV=3	313	GITRALcATRQEP
ylide_biotin	11	FITVCDYTNPCTKSWFWTR	1	Q99836	Myeloid differentiation primary response protein MyD88 OS=Homo sapiens OX=9606 GN=MYD88 PE=1 SV=1	280	CDYTNPcTKSWFW
ylide_biotin	5	GTAACADVR	1	Q8N1B4	Vacuolar protein sorting-associated protein 52 homolog OS=Homo sapiens OX=9606 GN=VPS52 PE=1 SV=1	220	ARGTAAcADVRGV
ylide_biotin	4	GQNCLEVR	3	O15156	Zinc finger and BTB domain-containing protein 7B OS=Homo sapiens OX=9606 GN=ZBTB7B PE=1 SV=2	454	HLKGQNcLEVRTR
ylide_biotin	11	AEAEAASEVWCRRVR	1	O95081	Arf-GAP domain and FG repeat-containing protein 2 OS=Homo sapiens OX=9606 GN=AGFG2 PE=1 SV=2	30	AASEVWcRRVREL
ylide_biotin	5	ELGGCSQAGNR	8	O95081	Arf-GAP domain and FG repeat-containing protein 2 OS=Homo sapiens OX=9606 GN=AGFG2 PE=1 SV=2	39	VRELGGcSQAGNR
ylide_biotin	6	EKPSNCAASTEK	2	P49116	Nuclear receptor subfamily 2 group C member 2 OS=Homo sapiens OX=9606 GN=NR2C2 PE=1 SV=1	204	REKPSNcAASTEK
ylide_biotin	6	FFAPECGRCQR	2	Q96HC4	PDZ and LIM domain protein 5 OS=Homo sapiens OX=9606 GN=PDLIM5 PE=1 SV=5	479	KFFAPEcGRCQRK
ylide_biotin	4	IKGCTGSLNMTLQR	1	Q96HC4	PDZ and LIM domain protein 5 OS=Homo sapiens OX=9606 GN=PDLIM5 PE=1 SV=5	73	QNKIKGcTGSLNM
ylide_biotin	15	TAVNVPRQPTVTSVCSETSQELAEGQR	3	Q96HC4	PDZ and LIM domain protein 5 OS=Homo sapiens OX=9606 GN=PDLIM5 PE=1 SV=5	213	PTVTSVcSETSQE
ylide_biotin	7	TPMCAHCNQVIR	1	Q96HC4	PDZ and LIM domain protein 5 OS=Homo sapiens OX=9606 GN=PDLIM5 PE=1 SV=5	423	TPMCAHcNQVIRG
ylide_biotin	4	GLPCKKAATEGSSEK	1	Q9UGU0	Transcription factor 20 OS=Homo sapiens OX=9606 GN=TCF20 PE=1 SV=3	1808	LSRGLPcKKAATE
ylide_biotin	6	HRSEDCGGGPR	1	Q9UGU0	Transcription factor 20 OS=Homo sapiens OX=9606 GN=TCF20 PE=1 SV=3	1795	RHRSEDcGGGPRS
ylide_biotin	5	RSVICDISPLR	1	Q9UGU0	Transcription factor 20 OS=Homo sapiens OX=9606 GN=TCF20 PE=1 SV=3	868	ERRSVIcDISPLR
ylide_biotin	2	GCENLNIVQDK	3	Q7Z417	Nuclear fragile X mental retardation-interacting protein 2 OS=Homo sapiens OX=9606 GN=NUFIP2 PE=1 SV=1	234	RNSAKGcENLNIV
ylide_biotin	6	LSTASCPTPK	2	Q9NQX3	Gephyrin OS=Homo sapiens OX=9606 GN=GPHN PE=1 SV=1	284	RLSTAScPTPKVQ
ylide_biotin	5	VQSRCSSKENILR	1	Q9NQX3	Gephyrin OS=Homo sapiens OX=9606 GN=GPHN PE=1 SV=1	293	PKVQSRcSSKENI
ylide_biotin	8	AFGIPVRCYSAEVVTLWYRPPDVLFGAK	1	Q00535	Cyclin-dependent-like kinase 5 OS=Homo sapiens OX=9606 GN=CDK5 PE=1 SV=3	157	FGIPVRcYSAEVV
ylide_biotin	8	KGSSSSVCSVASSSDISLGSTK	1	Q9ULT8	E3 ubiquitin-protein ligase HECTD1 OS=Homo sapiens OX=9606 GN=HECTD1 PE=1 SV=3	1389	GSSSSVcSVASSS
ylide_biotin	15	MAAAGGTVSGPSSACKPGR	3	Q9ULT8	E3 ubiquitin-protein ligase HECTD1 OS=Homo sapiens OX=9606 GN=HECTD1 PE=1 SV=3	254	SGPSSAcKPGRST
ylide_biotin	4	ALACSSLQER	1	Q92870	Amyloid beta precursor protein binding family B member 2 OS=Homo sapiens OX=9606 GN=APBB2 PE=1 SV=3	560	NAKALAcSSLQER
ylide_biotin	8	VCLEFQDCGVGLNAAQFK	1	O95059	Ribonuclease P protein subunit p14 OS=Homo sapiens OX=9606 GN=RPP14 PE=1 SV=3	31	CLEFQDcGVGLNA
ylide_biotin	6	AISTICSLEKK	1	Q9UJX3	Anaphase-promoting complex subunit 7 OS=Homo sapiens OX=9606 GN=ANAPC7 PE=1 SV=4	259	RAISTIcSLEKKS
ylide_biotin	16	VRPSTGNSASTPQSQCLPSEIEVK	2	Q9UJX3	Anaphase-promoting complex subunit 7 OS=Homo sapiens OX=9606 GN=ANAPC7 PE=1 SV=4	131	STPQSQcLPSEIE
ylide_biotin	10	AHQETFPALCQLGK	1	P10276	Retinoic acid receptor alpha OS=Homo sapiens OX=9606 GN=RARA PE=1 SV=2	203	ETFPALcQLGKYT
ylide_biotin	11	LSENTQNTSLCSGTVVHGR	1	Q9GZR1	Sentrin-specific protease 6 OS=Homo sapiens OX=9606 GN=SENP6 PE=1 SV=2	127	TQNTSLcSGTVVH
ylide_biotin	13	KTTEEQVQASTPCPR	2	Q14137	Ribosome biogenesis protein BOP1 OS=Homo sapiens OX=9606 GN=BOP1 PE=1 SV=2	108	VQASTPcPRTEMA
ylide_biotin	9	ESISTTPKCFLEK	1	Q9Y2R4	Probable ATP-dependent RNA helicase DDX52 OS=Homo sapiens OX=9606 GN=DDX52 PE=1 SV=3	572	ISTTPKcFLEKAK
ylide_biotin	9	LVYSTCSLCQEENEDVVRDALQQNPGAFR	1	Q96P11	28S rRNA (cytosine-C(5))-methyltransferase OS=Homo sapiens OX=9606 GN=NSUN5 PE=1 SV=2	362	YSTCSLcQEENED
ylide_biotin	2	ICLQPPPTSR	1	P26640	Valine--tRNA ligase OS=Homo sapiens OX=9606 GN=VARS1 PE=1 SV=4	41	GAHPRIcLQPPPT
ylide_biotin	4	TRGCNGLSYTLEYTK	5	Q9BUE6	Iron-sulfur cluster assembly 1 homolog, mitochondrial OS=Homo sapiens OX=9606 GN=ISCA1 PE=1 SV=1	57	GVRTRGcNGLSYT
ylide_biotin	7	AVGIWHCGSCMK	2	P61513	60S ribosomal protein L37a OS=Homo sapiens OX=9606 GN=RPL37A PE=1 SV=2	57	AVGIWHcGSCMKT
ylide_biotin	10	AVGIWHCGSCMKTVAGGAWTYNTTSAVTVK	2	P61513	60S ribosomal protein L37a OS=Homo sapiens OX=9606 GN=RPL37A PE=1 SV=2	60	IWHCGScMKTVAG
ylide_biotin	3	YTCSFCGK	3	P61513	60S ribosomal protein L37a OS=Homo sapiens OX=9606 GN=RPL37A PE=1 SV=2	39	QHAKYTcSFCGKT
ylide_biotin	6	YTCSFCGKTK	3	P61513	60S ribosomal protein L37a OS=Homo sapiens OX=9606 GN=RPL37A PE=1 SV=2	42	KYTCSFcGKTKMK
ylide_biotin	10	MVSEAGTGFCFNTKR	2	O75394	39S ribosomal protein L33, mitochondrial OS=Homo sapiens OX=9606 GN=MRPL33 PE=1 SV=1	29	EAGTGFcFNTKRN
ylide_biotin	4	LPSCAQGSHTELLTAK	1	O75815	Breast cancer anti-estrogen resistance protein 3 OS=Homo sapiens OX=9606 GN=BCAR3 PE=1 SV=1	449	GAKLPScAQGSHT
ylide_biotin	7	SGSQPACLDHMQDRR	1	O75815	Breast cancer anti-estrogen resistance protein 3 OS=Homo sapiens OX=9606 GN=BCAR3 PE=1 SV=1	321	SGSQPAcLDHMQD
ylide_biotin	4	GCACAQK	1	Q99871	HAUS augmin-like complex subunit 7 OS=Homo sapiens OX=9606 GN=HAUS7 PE=1 SV=3	132	LLKGCAcAQKQLH
ylide_biotin	14	SQTDVYNDSTNLACRNGHLQSESGAVPK	1	Q9UBP0	Spastin OS=Homo sapiens OX=9606 GN=SPAST PE=1 SV=1	220	DSTNLAcRNGHLQ
ylide_biotin	5	EGAECELSRR	1	Q9P246	Stromal interaction molecule 2 OS=Homo sapiens OX=9606 GN=STIM2 PE=1 SV=2	313	LREGAEcELSRRQ
ylide_biotin	4	HTSCSSAGNDSKPVQEAPSVAR	1	Q9P246	Stromal interaction molecule 2 OS=Homo sapiens OX=9606 GN=STIM2 PE=1 SV=2	698	KPRHTScSSAGND
ylide_biotin	20	NSQWVPTLPNSSHHLDAVPCSTTINR	1	Q12824	SWI/SNF-related matrix-associated actin-dependent regulator of chromatin subfamily B member 1 OS=Homo sapiens OX=9606 GN=SMARCB1 PE=1 SV=2	147	HLDAVPcSTTINR
ylide_biotin	16	LGNYAGAVQDCERAICIDPAYSK	1	O43765	Small glutamine-rich tetratricopeptide repeat-containing protein alpha OS=Homo sapiens OX=9606 GN=SGTA PE=1 SV=1	153	DCERAIcIDPAYS
ylide_biotin	8	SFFDNISCDDNRER	2	Q8ND56	Protein LSM14 homolog A OS=Homo sapiens OX=9606 GN=LSM14A PE=1 SV=3	375	FFDNIScDDNRER
ylide_biotin	13	MSSPQAPEDGQGCGDRGDPPGDLR	1	O14734	Acyl-coenzyme A thioesterase 8 OS=Homo sapiens OX=9606 GN=ACOT8 PE=1 SV=1	13	PEDGQGcGDRGDP
ylide_biotin	6	MDLGECTKIHDLALR	1	Q9NQ29	Putative RNA-binding protein Luc7-like 1 OS=Homo sapiens OX=9606 GN=LUC7L PE=1 SV=1	59	RMDLGEcTKIHDL
ylide_biotin	11	FGVQTDRQDKCALGWDHQEK	4	Q14247	Src substrate cortactin OS=Homo sapiens OX=9606 GN=CTTN PE=1 SV=2	246	TDRQDKcALGWDH
ylide_biotin	2	HCSQVDSVR	18	Q14247	Src substrate cortactin OS=Homo sapiens OX=9606 GN=CTTN PE=1 SV=2	112	SKLSKHcSQVDSV
ylide_biotin	8	SGANVLICGPNGCGK	1	P28288	ATP-binding cassette sub-family D member 3 OS=Homo sapiens OX=9606 GN=ABCD3 PE=1 SV=1	472	GANVLIcGPNGCG
ylide_biotin	13	SGANVLICGPNGCGKSSLFR	1	P28288	ATP-binding cassette sub-family D member 3 OS=Homo sapiens OX=9606 GN=ABCD3 PE=1 SV=1	477	ICGPNGcGKSSLF
ylide_biotin	6	GKGSQCQSASSGNECNLGVWK	1	Q9UPQ9	Trinucleotide repeat-containing gene 6B protein OS=Homo sapiens OX=9606 GN=TNRC6B PE=1 SV=4	245	KGKGSQcQSASSG
ylide_biotin	15	KVAEPELMGTPDGTCYPPPPVPR	1	P27708	CAD protein OS=Homo sapiens OX=9606 GN=CAD PE=1 SV=3	1889	GTPDGTcYPPPPV
ylide_biotin	13	IYHPNINSNGSICLDILR	4	P61077	Ubiquitin-conjugating enzyme E2 D3 OS=Homo sapiens OX=9606 GN=UBE2D3 PE=1 SV=1	85	NSNGSIcLDILRS
ylide_biotin	10	VLLSICSLLCDPNPDDPLVPEIAR	1	P61077	Ubiquitin-conjugating enzyme E2 D3 OS=Homo sapiens OX=9606 GN=UBE2D3 PE=1 SV=1	111	SICSLLcDPNPDD
ylide_biotin	5	AGHVCTVQFLISK	2	O75179	Ankyrin repeat domain-containing protein 17 OS=Homo sapiens OX=9606 GN=ANKRD17 PE=1 SV=3	644	ARAGHVcTVQFLI
ylide_biotin	4	ISSCSDESSNSNSSR	1	O75179	Ankyrin repeat domain-containing protein 17 OS=Homo sapiens OX=9606 GN=ANKRD17 PE=1 SV=3	1622	NMRISScSDESSN
ylide_biotin	9	KSYESSEDCSEAAGSPAR	4	Q6P6C2	RNA demethylase ALKBH5 OS=Homo sapiens OX=9606 GN=ALKBH5 PE=1 SV=2	378	YESSEDcSEAAGS
ylide_biotin	10	SIGDGQYKRCGVTSVPDIR	1	Q9H0C8	Integrin-linked kinase-associated serine/threonine phosphatase 2C OS=Homo sapiens OX=9606 GN=ILKAP PE=1 SV=1	301	DGQYKRcGVTSVP
ylide_biotin	3	GLCRDEEDTSFESLSK	3	Q92844	TRAF family member-associated NF-kappa-B activator OS=Homo sapiens OX=9606 GN=TANK PE=1 SV=2	218	VTPRGLcRDEEDT
ylide_biotin	3	FKCIASTYYR	1	Q9BZG1	Ras-related protein Rab-34 OS=Homo sapiens OX=9606 GN=RAB34 PE=1 SV=1	116	GQERFKcIASTYY
ylide_biotin	3	VTCACQEHR	7	Q9BZG1	Ras-related protein Rab-34 OS=Homo sapiens OX=9606 GN=RAB34 PE=1 SV=1	38	FHPRVTcACQEHR
ylide_biotin	4	QSSCGKFQTK	6	Q9GZR7	ATP-dependent RNA helicase DDX24 OS=Homo sapiens OX=9606 GN=DDX24 PE=1 SV=1	15	RPKQSScGKFQTK
ylide_biotin	7	SESALSCLSK	2	Q9GZR7	ATP-dependent RNA helicase DDX24 OS=Homo sapiens OX=9606 GN=DDX24 PE=1 SV=1	832	SESALScLSKQKK
ylide_biotin	10	SLVFANSISCIKR	1	Q9GZR7	ATP-dependent RNA helicase DDX24 OS=Homo sapiens OX=9606 GN=DDX24 PE=1 SV=1	599	FANSIScIKRLSG
ylide_biotin	9	ATSPKELGCDRQSEEQMK	1	Q9UHI6	Probable ATP-dependent RNA helicase DDX20 OS=Homo sapiens OX=9606 GN=DDX20 PE=1 SV=2	538	SPKELGcDRQSEE
ylide_biotin	13	LQTEAQEDDWYDCHREIR	2	Q9UHI6	Probable ATP-dependent RNA helicase DDX20 OS=Homo sapiens OX=9606 GN=DDX20 PE=1 SV=2	758	EDDWYDcHREIRL
ylide_biotin	5	SHSECGIIEK	1	Q9UHI6	Probable ATP-dependent RNA helicase DDX20 OS=Homo sapiens OX=9606 GN=DDX20 PE=1 SV=2	524	VKSHSEcGIIEKA
ylide_biotin	4	SVVCSDTR	2	Q9H5V9	STING ER exit protein OS=Homo sapiens OX=9606 GN=STEEP1 PE=1 SV=1	11	VSRSVVcSDTRDR
ylide_biotin	5	DSSTCPGDYVLSVSENSR	3	P46109	Crk-like protein OS=Homo sapiens OX=9606 GN=CRKL PE=1 SV=1	44	VRDSSTcPGDYVL
ylide_biotin	4	RVPCAYDK	7	P46109	Crk-like protein OS=Homo sapiens OX=9606 GN=CRKL PE=1 SV=1	249	IQKRVPcAYDKTA
ylide_biotin	22	NYVTVMQNNPLTSGLEPSPPQCDYIRPSLTGK	4	P16333	Cytoplasmic protein NCK1 OS=Homo sapiens OX=9606 GN=NCK1 PE=1 SV=1	266	EPSPPQcDYIRPS
ylide_biotin	7	VIVMEKCSDGWWR	2	P16333	Cytoplasmic protein NCK1 OS=Homo sapiens OX=9606 GN=NCK1 PE=1 SV=1	139	VIVMEKcSDGWWR
ylide_biotin	13	EMGFGHYEEEESCWEKQK	1	Q8WUA2	Peptidyl-prolyl cis-trans isomerase-like 4 OS=Homo sapiens OX=9606 GN=PPIL4 PE=1 SV=1	426	YEEEEScWEKQKS
ylide_biotin	11	AANGLEADNSCPNSKAPVLSK	1	Q86V48	Leucine zipper protein 1 OS=Homo sapiens OX=9606 GN=LUZP1 PE=1 SV=2	594	LEADNScPNSKAP
ylide_biotin	2	SCLFEQGTRR	3	Q86V48	Leucine zipper protein 1 OS=Homo sapiens OX=9606 GN=LUZP1 PE=1 SV=2	969	LEQPRScLFEQGT
ylide_biotin	9	SKNDCTQLCLSLNEER	1	Q86V48	Leucine zipper protein 1 OS=Homo sapiens OX=9606 GN=LUZP1 PE=1 SV=2	138	NDCTQLcLSLNEE
ylide_biotin	5	CSKICEPGYSPTYK	3	P07858	Cathepsin B OS=Homo sapiens OX=9606 GN=CTSB PE=1 SV=3	211	PKCSKIcEPGYSP
ylide_biotin	6	EQWPQCPTIKEIR	1	P07858	Cathepsin B OS=Homo sapiens OX=9606 GN=CTSB PE=1 SV=3	93	REQWPQcPTIKEI
ylide_biotin	5	GQDHCGIESEVVAGIPR	8	P07858	Cathepsin B OS=Homo sapiens OX=9606 GN=CTSB PE=1 SV=3	319	LRGQDHcGIESEV
ylide_biotin	3	SLCSEGR	1	Q2M1P5	Kinesin-like protein KIF7 OS=Homo sapiens OX=9606 GN=KIF7 PE=1 SV=2	1229	GEKRSLcSEGRQA
ylide_biotin	12	ATEGMVVADKNCSK	1	Q99436	Proteasome subunit beta type-7 OS=Homo sapiens OX=9606 GN=PSMB7 PE=1 SV=1	74	VVADKNcSKIHFI
ylide_biotin	11	CVICDSYVRPCTLVR	6	Q7RTV0	PHD finger-like domain-containing protein 5A OS=Homo sapiens OX=9606 GN=PHF5A PE=1 SV=1	40	DSYVRPcTLVRIC
ylide_biotin	5	DRDGCPKIVNLGSSK	1	Q7RTV0	PHD finger-like domain-containing protein 5A OS=Homo sapiens OX=9606 GN=PHF5A PE=1 SV=1	85	EKDRDGcPKIVNL
ylide_biotin	8	HHPDLIFCR	19	Q7RTV0	PHD finger-like domain-containing protein 5A OS=Homo sapiens OX=9606 GN=PHF5A PE=1 SV=1	11	HPDLIFcRKQAGV
ylide_biotin	5	ICDECNYGSYQGR	3	Q7RTV0	PHD finger-like domain-containing protein 5A OS=Homo sapiens OX=9606 GN=PHF5A PE=1 SV=1	49	VRICDEcNYGSYQ
ylide_biotin	7	ATQTPSCWAEEGAEKR	2	Q86VQ1	Glucocorticoid-induced transcript 1 protein OS=Homo sapiens OX=9606 GN=GLCCI1 PE=1 SV=1	207	ATQTPScWAEEGA
ylide_biotin	10	QPISAPLFSCPDKNKVNFIPTGSAFCPVK	2	Q86VQ1	Glucocorticoid-induced transcript 1 protein OS=Homo sapiens OX=9606 GN=GLCCI1 PE=1 SV=1	445	SAPLFScPDKNKV
ylide_biotin	7	SPGSPVCRADK	3	Q86VQ1	Glucocorticoid-induced transcript 1 protein OS=Homo sapiens OX=9606 GN=GLCCI1 PE=1 SV=1	151	SPGSPVcRADKAK
ylide_biotin	8	SSVSRVPCNVEGISPELEK	1	Q86VQ1	Glucocorticoid-induced transcript 1 protein OS=Homo sapiens OX=9606 GN=GLCCI1 PE=1 SV=1	297	SVSRVPcNVEGIS
ylide_biotin	4	DRSCVTR	1	Q6WCQ1	Myosin phosphatase Rho-interacting protein OS=Homo sapiens OX=9606 GN=MPRIP PE=1 SV=3	1004	LKKDRScVTRQLR
ylide_biotin	7	MLEELECGAPGAR	2	Q13111	Chromatin assembly factor 1 subunit A OS=Homo sapiens OX=9606 GN=CHAF1A PE=1 SV=3	7	MLEELEcGAPGAR
ylide_biotin	6	SAGSMCITQFMK	4	Q13111	Chromatin assembly factor 1 subunit A OS=Homo sapiens OX=9606 GN=CHAF1A PE=1 SV=3	878	KSAGSMcITQFMK
ylide_biotin	7	FHADSVCKASNR	5	Q9BW61	DET1- and DDB1-associated protein 1 OS=Homo sapiens OX=9606 GN=DDA1 PE=1 SV=1	25	FHADSVcKASNRR
ylide_biotin	8	GLYDGPVCEVSVTPK	5	Q16555	Dihydropyrimidinase-related protein 2 OS=Homo sapiens OX=9606 GN=DPYSL2 PE=1 SV=1	504	LYDGPVcEVSVTP
ylide_biotin	5	GKPHCSRNPVLVR	25	Q02878	60S ribosomal protein L6 OS=Homo sapiens OX=9606 GN=RPL6 PE=1 SV=3	44	KKGKPHcSRNPVL
ylide_biotin	4	MVGCTGKVIGIDHIK	2	P22061	Protein-L-isoaspartate(D-aspartate) O-methyltransferase OS=Homo sapiens OX=9606 GN=PCMT1 PE=1 SV=4	102	FARMVGcTGKVIG
ylide_biotin	7	AVSTGDCGQVLR	2	Q6PJG2	Mitotic deacetylase-associated SANT domain protein OS=Homo sapiens OX=9606 GN=MIDEAS PE=1 SV=2	442	AVSTGDcGQVLRG
ylide_biotin	12	ALQATVGNSYKCNAEEHVR	1	P11279	Lysosome-associated membrane glycoprotein 1 OS=Homo sapiens OX=9606 GN=LAMP1 PE=1 SV=3	338	VGNSYKcNAEEHV
ylide_biotin	12	TTWGDGGENSPCNVVSK	3	O00161	Synaptosomal-associated protein 23 OS=Homo sapiens OX=9606 GN=SNAP23 PE=1 SV=1	112	GGENSPcNVVSKQ
ylide_biotin	14	AGAAAGGPGVSGVCVCK	1	Q16270	Insulin-like growth factor-binding protein 7 OS=Homo sapiens OX=9606 GN=IGFBP7 PE=1 SV=1	111	PGVSGVcVCKSRY
ylide_biotin	5	DACGCCPMCAR	2	Q16270	Insulin-like growth factor-binding protein 7 OS=Homo sapiens OX=9606 GN=IGFBP7 PE=1 SV=1	59	TRDACGcCPMCAR
ylide_biotin	6	GEGEPCGGGGAGR	4	Q16270	Insulin-like growth factor-binding protein 7 OS=Homo sapiens OX=9606 GN=IGFBP7 PE=1 SV=1	71	RGEGEPcGGGGAG
ylide_biotin	17	SRYPVCGSDGTTYPSGCQLR	5	Q16270	Insulin-like growth factor-binding protein 7 OS=Homo sapiens OX=9606 GN=IGFBP7 PE=1 SV=1	131	TTYPSGcQLRAAS
ylide_biotin	10	CSACNVWRVCEGPK	1	O75534	Cold shock domain-containing protein E1 OS=Homo sapiens OX=9606 GN=CSDE1 PE=1 SV=2	739	CNVWRVcEGPKAV
ylide_biotin	10	QRPGQQVATCVR	4	O75534	Cold shock domain-containing protein E1 OS=Homo sapiens OX=9606 GN=CSDE1 PE=1 SV=2	506	GQQVATcVRLLGR
ylide_biotin	12	YFSNRPGPTPGCQLPRPNCPVETLK	3	P50613	Cyclin-dependent kinase 7 OS=Homo sapiens OX=9606 GN=CDK7 PE=1 SV=1	305	PGPTPGcQLPRPN
ylide_biotin	3	MECPSCQHVSK	2	Q63HN8	E3 ubiquitin-protein ligase RNF213 OS=Homo sapiens OX=9606 GN=RNF213 PE=1 SV=3	3	MEcPSCQHV
ylide_biotin	5	TTAVCKDDLVTVK	1	P36957	Dihydrolipoyllysine-residue succinyltransferase component of 2-oxoglutarate dehydrogenase complex, mitochondrial OS=Homo sapiens OX=9606 GN=DLST PE=1 SV=4	66	FRTTAVcKDDLVT
ylide_biotin	10	AALIYTCTVCR	1	Q9Y5V0	Zinc finger protein 706 OS=Homo sapiens OX=9606 GN=ZNF706 PE=1 SV=1	44	IYTCTVcRTQMPD
ylide_biotin	7	AQMEVYCSDFHAER	2	Q96CV9	Optineurin OS=Homo sapiens OX=9606 GN=OPTN PE=1 SV=3	472	AQMEVYcSDFHAE
ylide_biotin	3	DTCEHSSEAK	1	Q9BWW4	Single-stranded DNA-binding protein 3 OS=Homo sapiens OX=9606 GN=SSBP3 PE=1 SV=1	80	PERRDTcEHSSEA
ylide_biotin	11	IKNPSIDLCTCPR	2	Q6P158	Putative ATP-dependent RNA helicase DHX57 OS=Homo sapiens OX=9606 GN=DHX57 PE=1 SV=2	1369	SIDLCTcPRGSRI
ylide_biotin	9	FRDQDLASCDRDR	3	Q9Y383	Putative RNA-binding protein Luc7-like 2 OS=Homo sapiens OX=9606 GN=LUC7L2 PE=1 SV=2	348	DQDLAScDRDRSS
ylide_biotin	6	MDLGECLKVHDLALR	8	Q9Y383	Putative RNA-binding protein Luc7-like 2 OS=Homo sapiens OX=9606 GN=LUC7L2 PE=1 SV=2	59	RMDLGEcLKVHDL
ylide_biotin	10	IAQLFSISPCQISQIYK	1	Q12800	Alpha-globin transcription factor CP2 OS=Homo sapiens OX=9606 GN=TFCP2 PE=1 SV=2	453	LFSISPcQISQIY
ylide_biotin	6	DKPVSCGLAR	1	Q3V6T2	Girdin OS=Homo sapiens OX=9606 GN=CCDC88A PE=1 SV=2	1729	KDKPVScGLARSV
ylide_biotin	7	LPPDRYCLTAPNYR	1	Q9HBM6	Transcription initiation factor TFIID subunit 9B OS=Homo sapiens OX=9606 GN=TAF9B PE=1 SV=1	121	LPPDRYcLTAPNY
ylide_biotin	23	RPYGVGLLIAGYDDMGPHIFQTCPSANYFDCR	2	P25786	Proteasome subunit alpha type-1 OS=Homo sapiens OX=9606 GN=PSMA1 PE=1 SV=1	148	PHIFQTcPSANYF
ylide_biotin	4	IDQCRTIFLNK	1	Q9UBT2	SUMO-activating enzyme subunit 2 OS=Homo sapiens OX=9606 GN=UBA2 PE=1 SV=2	413	SGKIDQcRTIFLN
ylide_biotin	14	MTGTLETQFTCPFCNHEKSCDVK	1	P60002	Transcription elongation factor 1 homolog OS=Homo sapiens OX=9606 GN=ELOF1 PE=1 SV=1	29	QFTCPFcNHEKSC
ylide_biotin	2	SCDVKMDR	1	P60002	Transcription elongation factor 1 homolog OS=Homo sapiens OX=9606 GN=ELOF1 PE=1 SV=1	35	CNHEKScDVKMDR
ylide_biotin	10	NLAEDEAHACAILIK	1	Q15334	Lethal(2) giant larvae protein homolog 1 OS=Homo sapiens OX=9606 GN=LLGL1 PE=1 SV=3	1059	EDEAHAcAILIK
ylide_biotin	6	LQGINCGPDFTPSFANLGR	2	Q04637	Eukaryotic translation initiation factor 4 gamma 1 OS=Homo sapiens OX=9606 GN=EIF4G1 PE=1 SV=4	662	RLQGINcGPDFTP
ylide_biotin	5	AGLHCTQAYPVR	4	Q92585	Mastermind-like protein 1 OS=Homo sapiens OX=9606 GN=MAML1 PE=1 SV=3	957	GRAGLHcTQAYPV
ylide_biotin	10	NLSFFLTPPCAR	1	P42224	Signal transducer and activator of transcription 1-alpha/beta OS=Homo sapiens OX=9606 GN=STAT1 PE=1 SV=2	492	FFLTPPcARWAQL
ylide_biotin	8	GQEFLRPCGSTEVD	1	O15460	Prolyl 4-hydroxylase subunit alpha-2 OS=Homo sapiens OX=9606 GN=P4HA2 PE=1 SV=1	529	QEFLRPcGSTEVD
ylide_biotin	7	SNQWGNCKEEK	1	Q8NDV7	Trinucleotide repeat-containing gene 6A protein OS=Homo sapiens OX=9606 GN=TNRC6A PE=1 SV=2	822	SNQWGNcKEEKAA
ylide_biotin	10	GTFVHSTWTCPMEVLRDHLLGVSDSGK	1	Q9Y2T3	Guanine deaminase OS=Homo sapiens OX=9606 GN=GDA PE=1 SV=1	24	VHSTWTcPMEVLR
ylide_biotin	6	LAKEWCFKPCEIR	5	Q9Y2T3	Guanine deaminase OS=Homo sapiens OX=9606 GN=GDA PE=1 SV=1	59	KLAKEWcFKPCEI
ylide_biotin	2	MCAAQMPPLAHIFR	8	Q9Y2T3	Guanine deaminase OS=Homo sapiens OX=9606 GN=GDA PE=1 SV=1	2	McAAQMPP
ylide_biotin	11	LATKEQEMQECTTQIQYLK	1	Q15007	Pre-mRNA-splicing regulator WTAP OS=Homo sapiens OX=9606 GN=WTAP PE=1 SV=2	90	EQEMQEcTTQIQY
ylide_biotin	5	GPPRCSFSPR	1	O95402	Mediator of RNA polymerase II transcription subunit 26 OS=Homo sapiens OX=9606 GN=MED26 PE=1 SV=2	271	PKGPPRcSFSPRN
ylide_biotin	13	GSQVTHSSLEMTCYDSDDANPR	1	Q8NEY1	Neuron navigator 1 OS=Homo sapiens OX=9606 GN=NAV1 PE=1 SV=2	293	SSLEMTcYDSDDA
ylide_biotin	4	FAECLEK	1	Q8IYB3	Serine/arginine repetitive matrix protein 1 OS=Homo sapiens OX=9606 GN=SRRM1 PE=1 SV=2	33	QLKFAEcLEKKVD
ylide_biotin	14	MAATFFGEVVKAPCR	2	O95456	Proteasome assembly chaperone 1 OS=Homo sapiens OX=9606 GN=PSMG1 PE=1 SV=1	14	EVVKAPcRAGTED
ylide_biotin	5	VFGSCPRK	1	O95456	Proteasome assembly chaperone 1 OS=Homo sapiens OX=9606 GN=PSMG1 PE=1 SV=1	157	EKVFGScPRKNMQ
ylide_biotin	6	GLSGPCRPPPPPQAR	2	Q9UEE5	Serine/threonine-protein kinase 17A OS=Homo sapiens OX=9606 GN=STK17A PE=1 SV=2	31	RGLSGPcRPPPPP
ylide_biotin	3	ATCKDLVMFI	1	P54819	Adenylate kinase 2, mitochondrial OS=Homo sapiens OX=9606 GN=AK2 PE=1 SV=2	232	AFSKATcKDLVMF
ylide_biotin	4	QASCSGDEYR	4	O95394	Phosphoacetylglucosamine mutase OS=Homo sapiens OX=9606 GN=PGM3 PE=1 SV=1	200	LTKQAScSGDEYR
ylide_biotin	6	VASGGCVRPARPER	1	Q9Y5B0	RNA polymerase II subunit A C-terminal domain phosphatase OS=Homo sapiens OX=9606 GN=CTDP1 PE=1 SV=3	73	RVASGGcVRPARP
ylide_biotin	10	HPLTQELKECEGIVPVPLAEK	2	P82932	28S ribosomal protein S6, mitochondrial OS=Homo sapiens OX=9606 GN=MRPS6 PE=1 SV=3	105	TQELKEcEGIVPV
ylide_biotin	12	TEEDETSEDANCLALSGHDKTEAK	1	P51003	Poly(A) polymerase alpha OS=Homo sapiens OX=9606 GN=PAPOLA PE=1 SV=4	677	TSEDANcLALSGH
ylide_biotin	5	SQGACVTPASGC	1	O00178	GTP-binding protein 1 OS=Homo sapiens OX=9606 GN=GTPBP1 PE=1 SV=3	662	VKSQGAcVTPASG
ylide_biotin	7	GHYAYDCHR	17	Q16629	Serine/arginine-rich splicing factor 7 OS=Homo sapiens OX=9606 GN=SRSF7 PE=1 SV=1	119	GHYAYDcHRYSRR
ylide_biotin	8	GLDGKVICGSR	2	Q16629	Serine/arginine-rich splicing factor 7 OS=Homo sapiens OX=9606 GN=SRSF7 PE=1 SV=1	73	LDGKVIcGSRVRV
ylide_biotin	9	RPFDPNDRCYECGEK	2	Q16629	Serine/arginine-rich splicing factor 7 OS=Homo sapiens OX=9606 GN=SRSF7 PE=1 SV=1	106	FDPNDRcYECGEK
ylide_biotin	9	LLDVPTGDCHISPK	1	Q9BSJ5	Uncharacterized protein C17orf80 OS=Homo sapiens OX=9606 GN=C17orf80 PE=1 SV=2	228	DVPTGDcHISPKN
ylide_biotin	9	NVIQEPRPCGGPHTAVGTK	1	Q86YN1	Dolichyldiphosphatase 1 OS=Homo sapiens OX=9606 GN=DOLPP1 PE=2 SV=1	86	IQEPRPcGGPHTA
ylide_biotin	5	QRPTCSSS	1	Q96G97	Seipin OS=Homo sapiens OX=9606 GN=BSCL2 PE=1 SV=3	395	LRQRPTcSSS
ylide_biotin	4	KTPCGEGSK	13	P60866	40S ribosomal protein S20 OS=Homo sapiens OX=9606 GN=RPS20 PE=1 SV=1	70	TTRKTPcGEGSKT
ylide_biotin	14	AIVDALPPPCESACTVPTDVDKWFHHQK	4	Q15181	Inorganic pyrophosphatase OS=Homo sapiens OX=9606 GN=PPA1 PE=1 SV=2	274	PPCESAcTVPTDV
ylide_biotin	12	AGGDSGNVDDDCERVKGPVGSLK	2	Q96K76	Ubiquitin carboxyl-terminal hydrolase 47 OS=Homo sapiens OX=9606 GN=USP47 PE=1 SV=3	856	GNVDDDcERVKGP
ylide_biotin	6	IVLERCYNDLR	1	Q96K76	Ubiquitin carboxyl-terminal hydrolase 47 OS=Homo sapiens OX=9606 GN=USP47 PE=1 SV=3	767	RIVLERcYNDLRL
ylide_biotin	12	AATMSAVEAATCRAK	1	Q53H96	Pyrroline-5-carboxylate reductase 3 OS=Homo sapiens OX=9606 GN=PYCR3 PE=1 SV=3	266	AVEAATcRAKELS
ylide_biotin	4	SDVCTPGGTTIYGLHALEQGGLR	3	Q53H96	Pyrroline-5-carboxylate reductase 3 OS=Homo sapiens OX=9606 GN=PYCR3 PE=1 SV=3	235	QLRSDVcTPGGTT
ylide_biotin	3	AKCTEALAK	2	Q9P209	Centrosomal protein of 72 kDa OS=Homo sapiens OX=9606 GN=CEP72 PE=1 SV=2	179	HHPRAKcTEALAK
ylide_biotin	8	FLEQQTLCNNQVNDLTTALK	1	Q9Y448	Small kinetochore-associated protein OS=Homo sapiens OX=9606 GN=KNSTRN PE=1 SV=2	296	LEQQTLcNNQVND
ylide_biotin	8	AASQINVCGVR	1	Q14678	KN motif and ankyrin repeat domain-containing protein 1 OS=Homo sapiens OX=9606 GN=KANK1 PE=1 SV=3	317	ASQINVcGVRKRS
ylide_biotin	6	IQDSSCEASSELRENGECR	1	Q14678	KN motif and ankyrin repeat domain-containing protein 1 OS=Homo sapiens OX=9606 GN=KANK1 PE=1 SV=3	386	KIQDSScEASSEL
ylide_biotin	10	VEDEMQVQECEPEKVEIR	1	Q14678	KN motif and ankyrin repeat domain-containing protein 1 OS=Homo sapiens OX=9606 GN=KANK1 PE=1 SV=3	1072	EMQVQEcEPEKVE
ylide_biotin	2	NCSSPEFSK	6	Q99829	Copine-1 OS=Homo sapiens OX=9606 GN=CPNE1 PE=1 SV=1	53	TERVRNcSSPEFS
ylide_biotin	6	APKSACGVCPGR	14	P49207	60S ribosomal protein L34 OS=Homo sapiens OX=9606 GN=RPL34 PE=1 SV=3	46	KAPKSAcGVCPGR
ylide_biotin	9	APKSACGVCPGRLR	1	P49207	60S ribosomal protein L34 OS=Homo sapiens OX=9606 GN=RPL34 PE=1 SV=3	49	KSACGVcPGRLRG
ylide_biotin	7	AYGGSMCAK	3	P49207	60S ribosomal protein L34 OS=Homo sapiens OX=9606 GN=RPL34 PE=1 SV=3	83	AYGGSMcAKCVRD
ylide_biotin	10	AYGGSMCAKCVRDR	7	P49207	60S ribosomal protein L34 OS=Homo sapiens OX=9606 GN=RPL34 PE=1 SV=3	86	GSMCAKcVRDRIK
ylide_biotin	8	AATESVPCSPSPLAGEIR	1	Q8N9M1	Uncharacterized protein C19orf47 OS=Homo sapiens OX=9606 GN=C19orf47 PE=1 SV=1	123	ATESVPcSPSPLA
ylide_biotin	11	GQGVYLGMPGCLPVYDALAGEFIR	1	P30040	Endoplasmic reticulum resident protein 29 OS=Homo sapiens OX=9606 GN=ERP29 PE=1 SV=4	157	YLGMPGcLPVYDA
ylide_biotin	21	AGEPNSPDAEEANSPDVTAGCDPAGVHPPR	2	Q08J23	RNA cytosine C(5)-methyltransferase NSUN2 OS=Homo sapiens OX=9606 GN=NSUN2 PE=1 SV=2	758	PDVTAGcDPAGVH
ylide_biotin	4	DGVCGPPPSK	4	Q08J23	RNA cytosine C(5)-methyltransferase NSUN2 OS=Homo sapiens OX=9606 GN=NSUN2 PE=1 SV=2	502	SKKDGVcGPPPSK
ylide_biotin	8	FGQGSRSCRVCSNR	2	P62273	40S ribosomal protein S29 OS=Homo sapiens OX=9606 GN=RPS29 PE=1 SV=2	21	GQGSRScRVCSNR
ylide_biotin	2	QCFRQYAK	2	P62273	40S ribosomal protein S29 OS=Homo sapiens OX=9606 GN=RPS29 PE=1 SV=2	42	LNMCRQcFRQYAK
ylide_biotin	5	SCRVCSNR	3	P62273	40S ribosomal protein S29 OS=Homo sapiens OX=9606 GN=RPS29 PE=1 SV=2	24	SRSCRVcSNRHGL
ylide_biotin	6	YGLNMCRQCFR	2	P62273	40S ribosomal protein S29 OS=Homo sapiens OX=9606 GN=RPS29 PE=1 SV=2	39	KYGLNMcRQCFRQ
ylide_biotin	5	EMGLCWKEVAYLGNEVSDEECLKR	3	Q8NFW8	N-acylneuraminate cytidylyltransferase OS=Homo sapiens OX=9606 GN=CMAS PE=1 SV=2	364	RKEMGLcWKEVAY
ylide_biotin	5	VNNSCQK	2	Q8NFW8	N-acylneuraminate cytidylyltransferase OS=Homo sapiens OX=9606 GN=CMAS PE=1 SV=2	432	EKVNNScQK
ylide_biotin	5	TQILCAERR	1	Q96C10	Probable ATP-dependent RNA helicase DHX58 OS=Homo sapiens OX=9606 GN=DHX58 PE=1 SV=1	322	TKTQILcAERRLL
ylide_biotin	2	SCQEGR	1	P49810	Presenilin-2 OS=Homo sapiens OX=9606 GN=PSEN2 PE=1 SV=1	31	SPTPRScQEGRQG
ylide_biotin	5	EKPVCGTTYK	3	Q14444	Caprin-1 OS=Homo sapiens OX=9606 GN=CAPRIN1 PE=1 SV=2	226	GKEKPVcGTTYKV
ylide_biotin	9	MKETPLSNCERR	2	Q06265	Exosome complex component RRP45 OS=Homo sapiens OX=9606 GN=EXOSC9 PE=1 SV=3	9	ETPLSNcERRFLL
ylide_biotin	6	SGNKECPTCR	2	Q99496	E3 ubiquitin-protein ligase RING2 OS=Homo sapiens OX=9606 GN=RNF2 PE=1 SV=1	87	RSGNKEcPTCRKK
ylide_biotin	3	AGCAVTSLLASELTK	2	O60610	Protein diaphanous homolog 1 OS=Homo sapiens OX=9606 GN=DIAPH1 PE=1 SV=2	1227	ANRKAGcAVTSLL
ylide_biotin	6	NLSYTCRANR	2	P24468	COUP transcription factor 2 OS=Homo sapiens OX=9606 GN=NR2F2 PE=1 SV=1	115	RNLSYTcRANRNC
ylide_biotin	6	NNLKDCGLF	3	P04899	Guanine nucleotide-binding protein G(i) subunit alpha-2 OS=Homo sapiens OX=9606 GN=GNAI2 PE=1 SV=3	352	KNNLKDcGLF
ylide_biotin	6	LVTIECGR	1	P41743	Protein kinase C iota type OS=Homo sapiens OX=9606 GN=PRKCI PE=1 SV=2	190	KLVTIEcGRHSLP
ylide_biotin	14	NDSPTQIPVSSDVCR	4	Q8TC07	TBC1 domain family member 15 OS=Homo sapiens OX=9606 GN=TBC1D15 PE=1 SV=2	686	PVSSDVcRLTPA
ylide_biotin	6	TLLVNCQNK	2	Q8TC07	TBC1 domain family member 15 OS=Homo sapiens OX=9606 GN=TBC1D15 PE=1 SV=2	197	RTLLVNcQNKSLS
ylide_biotin	5	YVVLCESPQDKR	1	Q8TC07	TBC1 domain family member 15 OS=Homo sapiens OX=9606 GN=TBC1D15 PE=1 SV=2	184	EKYVVLcESPQDK
ylide_biotin	5	YNNRCLDGQPMK	1	Q9BY77	Polymerase delta-interacting protein 3 OS=Homo sapiens OX=9606 GN=POLDIP3 PE=1 SV=2	338	KKYNNRcLDGQPM
ylide_biotin	3	YACCPGWKR	2	Q9UHF1	Epidermal growth factor-like protein 7 OS=Homo sapiens OX=9606 GN=EGFL7 PE=1 SV=3	88	ARPRYAcCPGWKR
ylide_biotin	6	GHSGTCSLRK	1	O75128	Protein cordon-bleu OS=Homo sapiens OX=9606 GN=COBL PE=1 SV=2	1164	RGHSGTcSLRKVA
ylide_biotin	3	SSCFSLVQSSQR	1	O75128	Protein cordon-bleu OS=Homo sapiens OX=9606 GN=COBL PE=1 SV=2	975	AIHRSScFSLVQS
ylide_biotin	3	RYCVRPNSGIIDPGSTVTVSVMLQPFDYDPNEK	2	Q9P0L0	Vesicle-associated membrane protein-associated protein A OS=Homo sapiens OX=9606 GN=VAPA PE=1 SV=3	60	TAPRRYcVRPNSG
ylide_biotin	7	DGVALKCEESGKEAK	1	Q5T6J7	Probable gluconokinase OS=Homo sapiens OX=9606 GN=IDNK PE=1 SV=1	105	DGVALKcEESGKE
ylide_biotin	7	TCDGVQCAFEELVEK	3	Q9NP72	Ras-related protein Rab-18 OS=Homo sapiens OX=9606 GN=RAB18 PE=1 SV=1	160	TCDGVQcAFEELV
ylide_biotin	5	LMDVCATSR	1	P11802	Cyclin-dependent kinase 4 OS=Homo sapiens OX=9606 GN=CDK4 PE=1 SV=2	78	VRLMDVcATSRTD
ylide_biotin	6	RKPLFCGNSEADQLGK	1	P11802	Cyclin-dependent kinase 4 OS=Homo sapiens OX=9606 GN=CDK4 PE=1 SV=2	215	RRKPLFcGNSEAD
ylide_biotin	9	ALLDSSENCDRLSSSPGLFGAFSVR	1	Q5VT52	Regulation of nuclear pre-mRNA domain-containing protein 2 OS=Homo sapiens OX=9606 GN=RPRD2 PE=1 SV=1	903	LDSSENcDRLSSS
ylide_biotin	26	LPSNSLGFTATHNTSPAAPPTEVTICQSSEVSKPK	2	Q5VT52	Regulation of nuclear pre-mRNA domain-containing protein 2 OS=Homo sapiens OX=9606 GN=RPRD2 PE=1 SV=1	649	PTEVTIcQSSEVS
ylide_biotin	4	VDVCSTETLK	1	Q5VT52	Regulation of nuclear pre-mRNA domain-containing protein 2 OS=Homo sapiens OX=9606 GN=RPRD2 PE=1 SV=1	222	TMRVDVcSTETLK
ylide_biotin	5	VSSSCLDLPDSTEEK	1	Q5VT52	Regulation of nuclear pre-mRNA domain-containing protein 2 OS=Homo sapiens OX=9606 GN=RPRD2 PE=1 SV=1	1071	TRVSSScLDLPDS
ylide_biotin	3	KSCMNQVTISTTDRR	1	O14757	Serine/threonine-protein kinase Chk1 OS=Homo sapiens OX=9606 GN=CHEK1 PE=1 SV=2	408	YQWKKScMNQVTI
ylide_biotin	8	NHAGSPGCEESDAGKEK	1	P42575	Caspase-2 OS=Homo sapiens OX=9606 GN=CASP2 PE=1 SV=2	343	HAGSPGcEESDAG
ylide_biotin	5	NAGNCLSPAVIVGLLK	1	O43175	D-3-phosphoglycerate dehydrogenase OS=Homo sapiens OX=9606 GN=PHGDH PE=1 SV=4	369	LKNAGNcLSPAVI
ylide_biotin	10	VLISDSLDPCCRK	1	O43175	D-3-phosphoglycerate dehydrogenase OS=Homo sapiens OX=9606 GN=PHGDH PE=1 SV=4	18	SDSLDPcCRKILQ
ylide_biotin	5	QICSCDGLTIWEER	1	O14618	Copper chaperone for superoxide dismutase OS=Homo sapiens OX=9606 GN=CCS PE=1 SV=1	246	PKQICScDGLTIW
ylide_biotin	9	AGSPTLLNCLMYKMSYYR	1	Q8TCJ2	Dolichyl-diphosphooligosaccharide--protein glycosyltransferase subunit STT3B OS=Homo sapiens OX=9606 GN=STT3B PE=1 SV=1	715	SPTLLNcLMYKMS
ylide_biotin	12	LQAQQDAVNIVCHSK	1	P55036	26S proteasome non-ATPase regulatory subunit 4 OS=Homo sapiens OX=9606 GN=PSMD4 PE=1 SV=1	37	DAVNIVcHSKTRS
ylide_biotin	15	RVIAEGDLGIVEKTCATDLQTK	1	O95861	3'(2'),5'-bisphosphate nucleotidase 1 OS=Homo sapiens OX=9606 GN=BPNT1 PE=1 SV=1	42	GIVEKTcATDLQT
ylide_biotin	7	GSQIGSCGTGVQWDGR	1	O60294	tRNA wybutosine-synthesizing protein 4 OS=Homo sapiens OX=9606 GN=LCMT2 PE=1 SV=3	408	GSQIGScGTGVQW
ylide_biotin	10	LALEQQQLICK	1	Q8IWX8	Calcium homeostasis endoplasmic reticulum protein OS=Homo sapiens OX=9606 GN=CHERP PE=1 SV=3	69	EQQQLIcKQQTPE
ylide_biotin	7	SSVQEECVSTISSSK	5	Q7L0Y3	tRNA methyltransferase 10 homolog C OS=Homo sapiens OX=9606 GN=TRMT10C PE=1 SV=2	78	SSVQEEcVSTISS
ylide_biotin	7	AMQVESCSSAVGVSNR	4	O94916	Nuclear factor of activated T-cells 5 OS=Homo sapiens OX=9606 GN=NFAT5 PE=1 SV=1	108	AMQVEScSSAVGV
ylide_biotin	9	EISSPARPCSFEEAMK	2	O94916	Nuclear factor of activated T-cells 5 OS=Homo sapiens OX=9606 GN=NFAT5 PE=1 SV=1	566	SSPARPcSFEEAM
ylide_biotin	6	KSPMLCGQYPVKSEGK	1	O94916	Nuclear factor of activated T-cells 5 OS=Homo sapiens OX=9606 GN=NFAT5 PE=1 SV=1	270	KKSPMLcGQYPVK
ylide_biotin	4	RRDCEESNMDIFDADSAK	1	O94916	Nuclear factor of activated T-cells 5 OS=Homo sapiens OX=9606 GN=NFAT5 PE=1 SV=1	217	GVKRRDcEESNMD
ylide_biotin	5	SLHSCSVKGEEEVFLIGK	1	O94916	Nuclear factor of activated T-cells 5 OS=Homo sapiens OX=9606 GN=NFAT5 PE=1 SV=1	455	KKSLHScSVKGEE
ylide_biotin	9	YVHYEIDACMDSEAPGSK	1	Q86U44	N6-adenosine-methyltransferase catalytic subunit OS=Homo sapiens OX=9606 GN=METTL3 PE=1 SV=2	336	HYEIDAcMDSEAP
ylide_biotin	5	HLGVCISVANNR	2	O43390	Heterogeneous nuclear ribonucleoprotein R OS=Homo sapiens OX=9606 GN=HNRNPR PE=1 SV=1	240	GKHLGVcISVANN
ylide_biotin	15	QAGIGGEPAAAGAGCSPRPK	1	Q68DK7	Male-specific lethal 1 homolog OS=Homo sapiens OX=9606 GN=MSL1 PE=1 SV=3	125	AAAGAGcSPRPKY
ylide_biotin	5	STSSCSSK	1	Q9H4L5	Oxysterol-binding protein-related protein 3 OS=Homo sapiens OX=9606 GN=OSBPL3 PE=1 SV=1	24	SRSTSScSSKQGS
ylide_biotin	5	TQSPCFGDDDPAK	9	Q12765	Secernin-1 OS=Homo sapiens OX=9606 GN=SCRN1 PE=1 SV=2	324	PKTQSPcFGDDDP
ylide_biotin	9	ITNSLTVLCSEKQKQEK	2	O75822	Eukaryotic translation initiation factor 3 subunit J OS=Homo sapiens OX=9606 GN=EIF3J PE=1 SV=2	207	NSLTVLcSEKQKQ
ylide_biotin	12	LPGNISSLNVECRNSK	1	Q86W56	Poly(ADP-ribose) glycohydrolase OS=Homo sapiens OX=9606 GN=PARG PE=1 SV=1	397	SSLNVEcRNSKQH
ylide_biotin	10	MNAGPGCEPCTKRPR	1	Q86W56	Poly(ADP-ribose) glycohydrolase OS=Homo sapiens OX=9606 GN=PARG PE=1 SV=1	10	GPGCEPcTKRPRW
ylide_biotin	14	STQYLNQHQTAAMCK	1	Q86W56	Poly(ADP-ribose) glycohydrolase OS=Homo sapiens OX=9606 GN=PARG PE=1 SV=1	155	HQTAAMcKWQNEG
ylide_biotin	5	DNKDCTVDKR	5	P28702	Retinoic acid receptor RXR-beta OS=Homo sapiens OX=9606 GN=RXRB PE=1 SV=2	247	CRDNKDcTVDKRQ
ylide_biotin	4	GLHCPPPPGGPGAGK	6	P28702	Retinoic acid receptor RXR-beta OS=Homo sapiens OX=9606 GN=RXRB PE=1 SV=2	191	GVRGLHcPPPPGG
ylide_biotin	6	HAAGQCGPVGVR	4	P28702	Retinoic acid receptor RXR-beta OS=Homo sapiens OX=9606 GN=RXRB PE=1 SV=2	19	RHAAGQcGPVGVR
ylide_biotin	5	LCAICGDR	1	P28702	Retinoic acid receptor RXR-beta OS=Homo sapiens OX=9606 GN=RXRB PE=1 SV=2	208	KRLCAIcGDRSSG
ylide_biotin	4	YQKCLATGMK	3	P28702	Retinoic acid receptor RXR-beta OS=Homo sapiens OX=9606 GN=RXRB PE=1 SV=2	265	YCRYQKcLATGMK
ylide_biotin	7	WGLGGTCVNVGCIPK	2	Q16881	Thioredoxin reductase 1, cytoplasmic OS=Homo sapiens OX=9606 GN=TXNRD1 PE=1 SV=3	209	WGLGGTcVNVGCI
ylide_biotin	10	VLGMTLIQKCDFPIMK	5	Q04760	Lactoylglutathione lyase OS=Homo sapiens OX=9606 GN=GLO1 PE=1 SV=4	61	MTLIQKcDFPIMK
ylide_biotin	6	LWKSDC	1	P61964	WD repeat-containing protein 5 OS=Homo sapiens OX=9606 GN=WDR5 PE=1 SV=1	334	KLWKSDc
ylide_biotin	11	AAAGEFADDPCSSVKR	1	P35221	Catenin alpha-1 OS=Homo sapiens OX=9606 GN=CTNNA1 PE=1 SV=1	116	EFADDPcSSVKRG
ylide_biotin	11	GIGMNEPLVDCEGYPR	6	O00233	26S proteasome non-ATPase regulatory subunit 9 OS=Homo sapiens OX=9606 GN=PSMD9 PE=1 SV=3	59	NEPLVDcEGYPRS
ylide_biotin	7	MAVDGGCGDTGDWEGR	4	Q8TBC4	NEDD8-activating enzyme E1 catalytic subunit OS=Homo sapiens OX=9606 GN=UBA3 PE=1 SV=2	28	MAVDGGcGDTGDW
ylide_biotin	12	NINPSTANSPKCQELALR	1	P46937	Transcriptional coactivator YAP1 OS=Homo sapiens OX=9606 GN=YAP1 PE=1 SV=2	343	TANSPKcQELALR
ylide_biotin	6	VCSNTCR	3	Q9Y692	Glucocorticoid modulatory element-binding protein 1 OS=Homo sapiens OX=9606 GN=GMEB1 PE=1 SV=2	178	KVCSNTcRSTKFD
ylide_biotin	6	IGLEGCLCQDFYR	1	Q9P2I0	Cleavage and polyadenylation specificity factor subunit 2 OS=Homo sapiens OX=9606 GN=CPSF2 PE=1 SV=2	763	RIGLEGcLCQDFY
ylide_biotin	2	KCQGITAPIEAQVR	2	P52756	RNA-binding protein 5 OS=Homo sapiens OX=9606 GN=RBM5 PE=1 SV=2	766	SGLGRKcQGITAP
ylide_biotin	5	SKNNCQNQPPSK	1	Q8IYA6	Cytoskeleton-associated protein 2-like OS=Homo sapiens OX=9606 GN=CKAP2L PE=1 SV=4	44	LKSKNNcQNQPPS
ylide_biotin	4	MALCNGDSK	3	P49915	GMP synthase [glutamine-hydrolyzing] OS=Homo sapiens OX=9606 GN=GMPS PE=1 SV=1	4	MALcNGDSKL
ylide_biotin	4	QPSCQRSVVIR	1	P49915	GMP synthase [glutamine-hydrolyzing] OS=Homo sapiens OX=9606 GN=GMPS PE=1 SV=1	631	LQKQPScQRSVVI
ylide_biotin	8	TVGVQGDCR	3	P49915	GMP synthase [glutamine-hydrolyzing] OS=Homo sapiens OX=9606 GN=GMPS PE=1 SV=1	523	VGVQGDcRSYSYV
ylide_biotin	4	VKACTTEEDQEK	1	P49915	GMP synthase [glutamine-hydrolyzing] OS=Homo sapiens OX=9606 GN=GMPS PE=1 SV=1	489	LQRVKAcTTEEDQ
ylide_biotin	10	VICAEEPYICK	13	P49915	GMP synthase [glutamine-hydrolyzing] OS=Homo sapiens OX=9606 GN=GMPS PE=1 SV=1	456	AEEPYIcKDFPET
ylide_biotin	16	HTVFVLDDGTVYTCGCNDLGQLGHEK	5	Q5GLZ8	Probable E3 ubiquitin-protein ligase HERC4 OS=Homo sapiens OX=9606 GN=HERC4 PE=1 SV=1	60	TVYTCGcNDLGQL
ylide_biotin	10	YGQLGLGTDCKKQTSPQLLK	1	Q5GLZ8	Probable E3 ubiquitin-protein ligase HERC4 OS=Homo sapiens OX=9606 GN=HERC4 PE=1 SV=1	175	LGLGTDcKKQTSP
ylide_biotin	4	TPRCAAPQIR	1	Q13415	Origin recognition complex subunit 1 OS=Homo sapiens OX=9606 GN=ORC1 PE=1 SV=2	469	KPRTPRcAAPQIR
ylide_biotin	6	AFDRHCNMVLENVK	1	P62316	Small nuclear ribonucleoprotein Sm D2 OS=Homo sapiens OX=9606 GN=SNRPD2 PE=1 SV=1	63	KAFDRHcNMVLEN
ylide_biotin	6	CVACECDLGGSSSGAEVR	3	Q8WWI1	LIM domain only protein 7 OS=Homo sapiens OX=9606 GN=LMO7 PE=1 SV=3	1648	KCVACEcDLGGSS
ylide_biotin	11	IRNHQLYCNDCYLR	1	Q8WWI1	LIM domain only protein 7 OS=Homo sapiens OX=9606 GN=LMO7 PE=1 SV=3	1671	QLYCNDcYLRFKS
ylide_biotin	5	SLTSCSSDITLR	1	Q8WWI1	LIM domain only protein 7 OS=Homo sapiens OX=9606 GN=LMO7 PE=1 SV=3	261	SRSLTScSSDITL
ylide_biotin	5	IVEACKAK	1	Q9NT62	Ubiquitin-like-conjugating enzyme ATG3 OS=Homo sapiens OX=9606 GN=ATG3 PE=1 SV=1	182	RKIVEAcKAKTDA
ylide_biotin	5	STDPCQGHR	1	Q8TBN0	Guanine nucleotide exchange factor for Rab-3A OS=Homo sapiens OX=9606 GN=RAB3IL1 PE=1 SV=1	29	WKSTDPcQGHRES
ylide_biotin	13	MAADISESSGADCKGDPR	3	O43583	Density-regulated protein OS=Homo sapiens OX=9606 GN=DENR PE=1 SV=2	13	ESSGADcKGDPRN
ylide_biotin	2	ICSLNLPSEESTR	1	Q9Y620	DNA repair and recombination protein RAD54B OS=Homo sapiens OX=9606 GN=RAD54B PE=1 SV=1	63	QNDLRIcSLNLPS
ylide_biotin	6	AVEVACYVCK	2	P45985	Dual specificity mitogen-activated protein kinase kinase 4 OS=Homo sapiens OX=9606 GN=MAP2K4 PE=1 SV=1	379	RAVEVAcYVCKIL
ylide_biotin	4	DAGCRPYMAPER	1	P45985	Dual specificity mitogen-activated protein kinase kinase 4 OS=Homo sapiens OX=9606 GN=MAP2K4 PE=1 SV=1	266	KTRDAGcRPYMAP
ylide_biotin	2	KCYLEREQGEK	1	P43246	DNA mismatch repair protein Msh2 OS=Homo sapiens OX=9606 GN=MSH2 PE=1 SV=1	873	EPAAKKcYLEREQ
ylide_biotin	3	VTCKEEK	1	P43246	DNA mismatch repair protein Msh2 OS=Homo sapiens OX=9606 GN=MSH2 PE=1 SV=1	527	YYFRVTcKEEKVL
ylide_biotin	19	QQLLPPFPSLHQSLPQNQCYMATTK	2	Q9H9B1	Histone-lysine N-methyltransferase EHMT1 OS=Homo sapiens OX=9606 GN=EHMT1 PE=1 SV=4	265	SLPQNQcYMATTK
ylide_biotin	10	VNNASYCPHCGEESSK	4	Q9H9B1	Histone-lysine N-methyltransferase EHMT1 OS=Homo sapiens OX=9606 GN=EHMT1 PE=1 SV=4	630	ASYCPHcGEESSK
ylide_biotin	5	TNGHCDPEIQTTR	2	Q9P2B4	CTTNBP2 N-terminal-like protein OS=Homo sapiens OX=9606 GN=CTTNBP2NL PE=1 SV=2	352	AKTNGHcDPEIQT
ylide_biotin	3	ALCGQCVR	1	O15304	Apoptosis regulatory protein Siva OS=Homo sapiens OX=9606 GN=SIVA1 PE=1 SV=2	135	QCERALcGQCVRT
ylide_biotin	3	AVCGQCER	1	O15304	Apoptosis regulatory protein Siva OS=Homo sapiens OX=9606 GN=SIVA1 PE=1 SV=2	127	VDGKAVcGQCERA
ylide_biotin	6	AVCGQCERALCGQCVR	1	O15304	Apoptosis regulatory protein Siva OS=Homo sapiens OX=9606 GN=SIVA1 PE=1 SV=2	130	KAVCGQcERALCG
ylide_biotin	7	ELSRGVCAERYSQEVFEK	3	O15304	Apoptosis regulatory protein Siva OS=Homo sapiens OX=9606 GN=SIVA1 PE=1 SV=2	30	ELSRGVcAERYSQ
ylide_biotin	6	MPKRSCPFADVAPLQLK	1	O15304	Apoptosis regulatory protein Siva OS=Homo sapiens OX=9606 GN=SIVA1 PE=1 SV=2	6	MPKRScPFADVA
ylide_biotin	4	AVNCRK	3	P62987	Ubiquitin-60S ribosomal protein L40 OS=Homo sapiens OX=9606 GN=UBA52 PE=1 SV=2	110	HPRAVNcRKKKCG
ylide_biotin	8	QLAQKYNCDK	10	P62987	Ubiquitin-60S ribosomal protein L40 OS=Homo sapiens OX=9606 GN=UBA52 PE=1 SV=2	91	LAQKYNcDKMICR
ylide_biotin	4	KGPCAVSSNPYAFK	2	Q5VYS8	Terminal uridylyltransferase 7 OS=Homo sapiens OX=9606 GN=TUT7 PE=1 SV=1	70	TPRKGPcAVSSNP
ylide_biotin	18	NSVLAQGPGATSSAANTCKVQPLTLK	1	Q5VYS8	Terminal uridylyltransferase 7 OS=Homo sapiens OX=9606 GN=TUT7 PE=1 SV=1	690	SSAANTcKVQPLT
ylide_biotin	7	RGEHVVCGSTR	1	Q5VYS8	Terminal uridylyltransferase 7 OS=Homo sapiens OX=9606 GN=TUT7 PE=1 SV=1	775	RGEHVVcGSTRNN
ylide_biotin	6	AGALQCSPSDAYTKK	1	Q9Y490	Talin-1 OS=Homo sapiens OX=9606 GN=TLN1 PE=1 SV=3	1939	KAGALQcSPSDAY
ylide_biotin	8	AVAAGNSCRQEDVIATANLSR	1	Q9Y490	Talin-1 OS=Homo sapiens OX=9606 GN=TLN1 PE=1 SV=3	2196	VAAGNScRQEDVI
ylide_biotin	3	SNCKPSTFAYPAPLEVPK	1	Q99460	26S proteasome non-ATPase regulatory subunit 1 OS=Homo sapiens OX=9606 GN=PSMD1 PE=1 SV=2	806	VQYKSNcKPSTFA
ylide_biotin	9	DGPPKKQVCGDSIKPEETEQEVAADETR	3	Q96GM8	Target of EGR1 protein 1 OS=Homo sapiens OX=9606 GN=TOE1 PE=1 SV=1	371	PPKKQVcGDSIKP
ylide_biotin	7	KSLLNQCIEER	1	Q96GM8	Target of EGR1 protein 1 OS=Homo sapiens OX=9606 GN=TOE1 PE=1 SV=1	80	KSLLNQcIEERYK
ylide_biotin	21	YGAVDPLLALLAVPDMSSLACGYLR	1	P52292	Importin subunit alpha-1 OS=Homo sapiens OX=9606 GN=KPNA2 PE=1 SV=1	223	DMSSLAcGYLRNL
ylide_biotin	5	FMADCPHTIGVEFGTR	7	P61106	Ras-related protein Rab-14 OS=Homo sapiens OX=9606 GN=RAB14 PE=1 SV=4	40	KKFMADcPHTIGV
ylide_biotin	17	AGNNMLLVGVHGPRTPCEEILVK	3	P21333	Filamin-A OS=Homo sapiens OX=9606 GN=FLNA PE=1 SV=4	2601	HGPRTPcEEILVK
ylide_biotin	6	AHVVPCFDASK	5	P21333	Filamin-A OS=Homo sapiens OX=9606 GN=FLNA PE=1 SV=4	1157	KAHVVPcFDASKV
ylide_biotin	14	AHVVPCFDASKVKCSGPGLER	1	P21333	Filamin-A OS=Homo sapiens OX=9606 GN=FLNA PE=1 SV=4	1165	DASKVKcSGPGLE
ylide_biotin	3	ATCAPQHGAPGPGPADASK	4	P21333	Filamin-A OS=Homo sapiens OX=9606 GN=FLNA PE=1 SV=4	2543	SLTKATcAPQHGA
ylide_biotin	3	IECDDKGDGSCDVR	1	P21333	Filamin-A OS=Homo sapiens OX=9606 GN=FLNA PE=1 SV=4	623	SQAKIEcDDKGDG
ylide_biotin	14	LQVEPAVDTSGVQCYGPGIEGQGVFR	2	P21333	Filamin-A OS=Homo sapiens OX=9606 GN=FLNA PE=1 SV=4	1260	DTSGVQcYGPGIE
ylide_biotin	11	SPFEVKVGTECGNQK	5	P21333	Filamin-A OS=Homo sapiens OX=9606 GN=FLNA PE=1 SV=4	574	VKVGTEcGNQKVR
ylide_biotin	11	SPYTVTVGQACNPSACR	1	P21333	Filamin-A OS=Homo sapiens OX=9606 GN=FLNA PE=1 SV=4	478	VTVGQAcNPSACR
ylide_biotin	16	SPYTVTVGQACNPSACRAVGR	1	P21333	Filamin-A OS=Homo sapiens OX=9606 GN=FLNA PE=1 SV=4	483	ACNPSAcRAVGRG
ylide_biotin	14	VPVHDVTDASKVKCSGPGLSPGMVR	1	P21333	Filamin-A OS=Homo sapiens OX=9606 GN=FLNA PE=1 SV=4	1453	DASKVKcSGPGLS
ylide_biotin	9	VQVQDNEGCPVEALVK	1	P21333	Filamin-A OS=Homo sapiens OX=9606 GN=FLNA PE=1 SV=4	717	VQDNEGcPVEALV
ylide_biotin	15	YWPQEAGEYAVHVLCNSEDIR	1	P21333	Filamin-A OS=Homo sapiens OX=9606 GN=FLNA PE=1 SV=4	649	YAVHVLcNSEDIR
ylide_biotin	5	AKRNCWPR	24	P62917	60S ribosomal protein L8 OS=Homo sapiens OX=9606 GN=RPL8 PE=1 SV=2	195	YKAKRNcWPRVRG
ylide_biotin	8	QAGMREECVLSEEQIR	1	Q13133	Oxysterols receptor LXR-alpha OS=Homo sapiens OX=9606 GN=NR1H3 PE=1 SV=2	167	AGMREEcVLSEEQ
ylide_biotin	4	LQECSNSDQLQGKEER	2	Q9NVR5	Protein kintoun OS=Homo sapiens OX=9606 GN=DNAAF2 PE=1 SV=2	673	NAKLQEcSNSDQL
ylide_biotin	8	ADTSQEICSPRLPISASHSSK	2	P52948	Nuclear pore complex protein Nup98-Nup96 OS=Homo sapiens OX=9606 GN=NUP98 PE=1 SV=4	1027	DTSQEIcSPRLPI
ylide_biotin	7	MTHSLVCPETVSR	13	Q86WQ0	Nuclear receptor 2C2-associated protein OS=Homo sapiens OX=9606 GN=NR2C2AP PE=1 SV=1	7	MTHSLVcPETVSR
ylide_biotin	12	LDVGNFSWGSECCTR	9	P62241	40S ribosomal protein S8 OS=Homo sapiens OX=9606 GN=RPS8 PE=1 SV=2	71	FSWGSEcCTRKTR
ylide_biotin	13	LDVGNFSWGSECCTRK	1	P62241	40S ribosomal protein S8 OS=Homo sapiens OX=9606 GN=RPS8 PE=1 SV=2	72	SWGSECcTRKTRI
ylide_biotin	4	LLACIASRPGQCGR	1	P62241	40S ribosomal protein S8 OS=Homo sapiens OX=9606 GN=RPS8 PE=1 SV=2	174	QGKLLAcIASRPG
ylide_biotin	12	LLACIASRPGQCGRADGYVLEGK	5	P62241	40S ribosomal protein S8 OS=Homo sapiens OX=9606 GN=RPS8 PE=1 SV=2	182	ASRPGQcGRADGY
ylide_biotin	2	ECDSPSYQKR	1	Q8NHU0	Cancer/testis antigen family 45 member A3 OS=Homo sapiens OX=9606 GN=CT45A3 PE=1 SV=1	22	FKRPREcDSPSYQ
ylide_biotin	4	ELRCVGQKYEK	1	Q8NHU0	Cancer/testis antigen family 45 member A3 OS=Homo sapiens OX=9606 GN=CT45A3 PE=1 SV=1	136	LVKELRcVGQKYE
ylide_biotin	26	MMQKPGSNAPVGGNVTSSFSGDDLECRETASSPK	1	Q8NHU0	Cancer/testis antigen family 45 member A3 OS=Homo sapiens OX=9606 GN=CT45A3 PE=1 SV=1	109	SGDDLEcRETASS
ylide_biotin	9	FVALENISCKIK	1	Q8TAT6	Nuclear protein localization protein 4 homolog OS=Homo sapiens OX=9606 GN=NPLOC4 PE=1 SV=3	188	ALENIScKIKSGC
ylide_biotin	5	IKSGCEGHLPWPNGICTK	2	Q8TAT6	Nuclear protein localization protein 4 homolog OS=Homo sapiens OX=9606 GN=NPLOC4 PE=1 SV=3	194	CKIKSGcEGHLPW
ylide_biotin	7	SRDPQLCRHGPLGK	3	Q8TAT6	Nuclear protein localization protein 4 homolog OS=Homo sapiens OX=9606 GN=NPLOC4 PE=1 SV=3	130	SRDPQLcRHGPLG
ylide_biotin	11	GSSHSPDHPGCLMEN	3	O95149	Snurportin-1 OS=Homo sapiens OX=9606 GN=SNUPN PE=1 SV=1	356	SPDHPGcLMEN
ylide_biotin	14	ASPSYSALDKTPHCSGANDFEAPFEQR	2	Q9NYD6	Homeobox protein Hox-C10 OS=Homo sapiens OX=9606 GN=HOXC10 PE=1 SV=2	164	LDKTPHcSGANDF
ylide_biotin	16	SGPEAALYSHPLPESCLGEHEVPVPSYYR	1	Q9NYD6	Homeobox protein Hox-C10 OS=Homo sapiens OX=9606 GN=HOXC10 PE=1 SV=2	137	HPLPEScLGEHEV
ylide_biotin	4	EGFCLQNVDKAPLAK	1	O75582	Ribosomal protein S6 kinase alpha-5 OS=Homo sapiens OX=9606 GN=RPS6KA5 PE=1 SV=1	731	YKREGFcLQNVDK
ylide_biotin	4	RLGCGPR	1	O75582	Ribosomal protein S6 kinase alpha-5 OS=Homo sapiens OX=9606 GN=RPS6KA5 PE=1 SV=1	304	PKKRLGcGPRDAD
ylide_biotin	3	MQCEVKDEKDDMK	1	Q9BRT6	Protein LLP homolog OS=Homo sapiens OX=9606 GN=LLPH PE=1 SV=1	64	CQEKMQcEVKDEK
ylide_biotin	8	LVHSGSGCRSPSLGSDLTFATR	1	Q13425	Beta-2-syntrophin OS=Homo sapiens OX=9606 GN=SNTB2 PE=1 SV=1	391	VHSGSGcRSPSLG
ylide_biotin	25	RVENSIPAAGETQNVEVAAGPAGKCAAVDVEPPSK	1	Q15020	Squamous cell carcinoma antigen recognized by T-cells 3 OS=Homo sapiens OX=9606 GN=SART3 PE=1 SV=1	670	AGPAGKcAAVDVE
ylide_biotin	5	NITRCGLSNSTLNYLR	1	Q86U70	LIM domain-binding protein 1 OS=Homo sapiens OX=9606 GN=LDB1 PE=1 SV=2	233	SKNITRcGLSNST
ylide_biotin	7	NLTGDVCAVMR	1	Q92922	SWI/SNF complex subunit SMARCC1 OS=Homo sapiens OX=9606 GN=SMARCC1 PE=1 SV=3	520	NLTGDVcAVMRVH
ylide_biotin	3	AVCEADQSHGGPR	3	O14545	TRAF-type zinc finger domain-containing protein 1 OS=Homo sapiens OX=9606 GN=TRAFD1 PE=1 SV=1	267	DFWRAVcEADQSH
ylide_biotin	9	DLKTHPEVCGREGEEK	2	O14545	TRAF-type zinc finger domain-containing protein 1 OS=Homo sapiens OX=9606 GN=TRAFD1 PE=1 SV=1	135	KTHPEVcGREGEE
ylide_biotin	14	EIPVFNFTIHEIHCQRNIGMCPTCK	1	O14545	TRAF-type zinc finger domain-containing protein 1 OS=Homo sapiens OX=9606 GN=TRAFD1 PE=1 SV=1	32	TIHEIHcQRNIGM
ylide_biotin	7	KHEETECPLR	1	O14545	TRAF-type zinc finger domain-containing protein 1 OS=Homo sapiens OX=9606 GN=TRAFD1 PE=1 SV=1	83	KHEETEcPLRLAV
ylide_biotin	8	LKEHEDYCGAR	10	O14545	TRAF-type zinc finger domain-containing protein 1 OS=Homo sapiens OX=9606 GN=TRAFD1 PE=1 SV=1	109	KEHEDYcGARTEL
ylide_biotin	8	NIGMCPTCKEPFPK	1	O14545	TRAF-type zinc finger domain-containing protein 1 OS=Homo sapiens OX=9606 GN=TRAFD1 PE=1 SV=1	42	IGMCPTcKEPFPK
ylide_biotin	12	SDMETHMAAEHCQVTCK	2	O14545	TRAF-type zinc finger domain-containing protein 1 OS=Homo sapiens OX=9606 GN=TRAFD1 PE=1 SV=1	60	HMAAEHcQVTCKC
ylide_biotin	9	STSGPRPGCQPSSPCVPK	4	O14545	TRAF-type zinc finger domain-containing protein 1 OS=Homo sapiens OX=9606 GN=TRAFD1 PE=1 SV=1	476	SGPRPGcQPSSPC
ylide_biotin	15	STSGPRPGCQPSSPCVPKLSNSDSQDIQGR	1	O14545	TRAF-type zinc finger domain-containing protein 1 OS=Homo sapiens OX=9606 GN=TRAFD1 PE=1 SV=1	482	CQPSSPcVPKLSN
ylide_biotin	4	TELCGNCGR	1	O14545	TRAF-type zinc finger domain-containing protein 1 OS=Homo sapiens OX=9606 GN=TRAFD1 PE=1 SV=1	116	GARTELcGNCGRN
ylide_biotin	7	TELCGNCGRNVLVK	1	O14545	TRAF-type zinc finger domain-containing protein 1 OS=Homo sapiens OX=9606 GN=TRAFD1 PE=1 SV=1	119	TELCGNcGRNVLV
ylide_biotin	5	AAPECKVVK	1	P15529	Membrane cofactor protein OS=Homo sapiens OX=9606 GN=CD46 PE=1 SV=3	223	SRAAPEcKVVKCR
ylide_biotin	9	LEETKWEVCQKSGEISLLK	1	Q9BRK4	Leucine zipper putative tumor suppressor 2 OS=Homo sapiens OX=9606 GN=LZTS2 PE=1 SV=2	444	ETKWEVcQKSGEI
ylide_biotin	10	QEASKPPRGCPQANR	3	Q8IVT2	Mitotic interactor and substrate of PLK1 OS=Homo sapiens OX=9606 GN=MISP PE=1 SV=1	491	SKPPRGcPQANRG
ylide_biotin	3	RLCDLER	2	Q8IVT2	Mitotic interactor and substrate of PLK1 OS=Homo sapiens OX=9606 GN=MISP PE=1 SV=1	137	ADPRRLcDLERER
ylide_biotin	2	GCHLEGVAGHK	2	P17813	Endoglin OS=Homo sapiens OX=9606 GN=ENG PE=1 SV=2	207	PALVRGcHLEGVA
ylide_biotin	6	HEVTICNYEASANPADHR	5	Q9GZP4	PITH domain-containing protein 1 OS=Homo sapiens OX=9606 GN=PITHD1 PE=1 SV=1	187	RHEVTIcNYEASA
ylide_biotin	19	KRGEAASGSGAELQEQAGCEAPEAAAPR	1	Q9UBU6	Protein FAM8A1 OS=Homo sapiens OX=9606 GN=FAM8A1 PE=1 SV=1	93	LQEQAGcEAPEAA
ylide_biotin	5	GGPTCSGVGGR	1	Q92966	snRNA-activating protein complex subunit 3 OS=Homo sapiens OX=9606 GN=SNAPC3 PE=1 SV=1	11	SRGGPTcSGVGGR
ylide_biotin	5	SVHYCPATK	11	P25205	DNA replication licensing factor MCM3 OS=Homo sapiens OX=9606 GN=MCM3 PE=1 SV=3	148	VRSVHYcPATKKT
ylide_biotin	4	YVLCTAPR	1	P25205	DNA replication licensing factor MCM3 OS=Homo sapiens OX=9606 GN=MCM3 PE=1 SV=3	360	LLRYVLcTAPRAI
ylide_biotin	4	SMVCTQK	1	Q92878	DNA repair protein RAD50 OS=Homo sapiens OX=9606 GN=RAD50 PE=1 SV=1	102	VQRSMVcTQKSKK
ylide_biotin	6	NCAVSCAGEK	2	Q15813	Tubulin-specific chaperone E OS=Homo sapiens OX=9606 GN=TBCE PE=1 SV=1	141	RNCAVScAGEKGG
ylide_biotin	15	FEIINAIYEPTEEECEWKPDEEDEISEELKEK	1	P55209	Nucleosome assembly protein 1-like 1 OS=Homo sapiens OX=9606 GN=NAP1L1 PE=1 SV=1	132	EPTEEEcEWKPDE
ylide_biotin	8	KDQNPAECKQQ	2	P55209	Nucleosome assembly protein 1-like 1 OS=Homo sapiens OX=9606 GN=NAP1L1 PE=1 SV=1	388	DQNPAEcKQQ
ylide_biotin	6	NLQVKCAQIEAK	1	P55209	Nucleosome assembly protein 1-like 1 OS=Homo sapiens OX=9606 GN=NAP1L1 PE=1 SV=1	88	KNLQVKcAQIEAK
ylide_biotin	4	FQKCLAVGMVK	2	P43354	Nuclear receptor subfamily 4 group A member 2 OS=Homo sapiens OX=9606 GN=NR4A2 PE=1 SV=1	323	YCRFQKcLAVGMV
ylide_biotin	9	YVCLANKNCPVDKR	2	P43354	Nuclear receptor subfamily 4 group A member 2 OS=Homo sapiens OX=9606 GN=NR4A2 PE=1 SV=1	305	CLANKNcPVDKRR
ylide_biotin	7	AAMDAVCAKVDAANR	3	Q86UY6	N-alpha-acetyltransferase 40 OS=Homo sapiens OX=9606 GN=NAA40 PE=1 SV=1	26	AAMDAVcAKVDAA
ylide_biotin	4	VIRCMTNTPVVVR	3	P32322	Pyrroline-5-carboxylate reductase 1, mitochondrial OS=Homo sapiens OX=9606 GN=PYCR1 PE=1 SV=2	120	APRVIRcMTNTPV
ylide_biotin	8	AGSSGNSCITYQPSVSGEHK	3	Q99755	Phosphatidylinositol 4-phosphate 5-kinase type-1 alpha OS=Homo sapiens OX=9606 GN=PIP5K1A PE=1 SV=1	480	GSSGNScITYQPS
ylide_biotin	7	LINMTYCPKTK	2	Q8WXG6	MAP kinase-activating death domain protein OS=Homo sapiens OX=9606 GN=MADD PE=1 SV=2	1489	LINMTYcPKTKVL
ylide_biotin	6	MSEVSCKKR	2	P32321	Deoxycytidylate deaminase OS=Homo sapiens OX=9606 GN=DCTD PE=1 SV=2	6	MSEVScKKRDDY
ylide_biotin	2	KCNTDQAGRPK	1	P33992	DNA replication licensing factor MCM5 OS=Homo sapiens OX=9606 GN=MCM5 PE=1 SV=5	197	YALPRKcNTDQAG
ylide_biotin	10	AAHTEDINACTLTTSPR	1	P04049	RAF proto-oncogene serine/threonine-protein kinase OS=Homo sapiens OX=9606 GN=RAF1 PE=1 SV=1	637	TEDINAcTLTTSP
ylide_biotin	6	GLQPECCAVFR	1	P04049	RAF proto-oncogene serine/threonine-protein kinase OS=Homo sapiens OX=9606 GN=RAF1 PE=1 SV=1	95	RGLQPEcCAVFRL
ylide_biotin	3	SGCNSASSTPDSTR	1	Q92547	DNA topoisomerase 2-binding protein 1 OS=Homo sapiens OX=9606 GN=TOPBP1 PE=1 SV=3	1099	SLSRSGcNSASST
ylide_biotin	8	VLVTTNVCAR	1	Q9UMR2	ATP-dependent RNA helicase DDX19B OS=Homo sapiens OX=9606 GN=DDX19B PE=1 SV=1	393	LVTTNVcARGIDV
ylide_biotin	5	FLMECR	7	Q13541	Eukaryotic translation initiation factor 4E-binding protein 1 OS=Homo sapiens OX=9606 GN=EIF4EBP1 PE=1 SV=3	62	RKFLMEcRNSPVT
ylide_biotin	7	MSGGSSCSQTPSR	4	Q13541	Eukaryotic translation initiation factor 4E-binding protein 1 OS=Homo sapiens OX=9606 GN=EIF4EBP1 PE=1 SV=3	7	MSGGSScSQTPSR
ylide_biotin	9	YATSCYSCCPR	1	Q13057	Bifunctional coenzyme A synthase OS=Homo sapiens OX=9606 GN=COASY PE=1 SV=4	144	TSCYSCcPRLASV
ylide_biotin	12	MLNYSAPSAGGCLLDRK	1	Q07352	mRNA decay activator protein ZFP36L1 OS=Homo sapiens OX=9606 GN=ZFP36L1 PE=1 SV=1	34	APSAGGcLLDRKA
ylide_biotin	18	MTTTLVSATIFDLSEVLCKGNK	1	Q07352	mRNA decay activator protein ZFP36L1 OS=Homo sapiens OX=9606 GN=ZFP36L1 PE=1 SV=1	18	DLSEVLcKGNKML
ylide_biotin	3	MACLLETPIR	1	Q8IUR7	Armadillo repeat-containing protein 8 OS=Homo sapiens OX=9606 GN=ARMC8 PE=1 SV=2	3	MAcLLETPI
ylide_biotin	7	ANEGRFCR	12	O95816	BAG family molecular chaperone regulator 2 OS=Homo sapiens OX=9606 GN=BAG2 PE=1 SV=1	16	ANEGRFcRSSSMA
ylide_biotin	5	MASSCAVQVK	1	P42568	Protein AF-9 OS=Homo sapiens OX=9606 GN=MLLT3 PE=1 SV=2	5	MASScAVQVKL
ylide_biotin	6	ASGQSCTLPK	2	Q9BZI7	Regulator of nonsense transcripts 3B OS=Homo sapiens OX=9606 GN=UPF3B PE=1 SV=1	319	RASGQScTLPKRS
ylide_biotin	29	AATEQEPLEGTEQTLDAEEEQEESEEAACGSKKR	1	Q9ULW3	Activator of basal transcription 1 OS=Homo sapiens OX=9606 GN=ABT1 PE=1 SV=1	37	ESEEAAcGSKKRV
ylide_biotin	3	SGCEER	4	O60427	Acyl-CoA (8-3)-desaturase OS=Homo sapiens OX=9606 GN=FADS1 PE=1 SV=3	31	VAQRSGcEERWLV
ylide_biotin	9	RTKEEELQC	1	Q16890	Tumor protein D53 OS=Homo sapiens OX=9606 GN=TPD52L1 PE=1 SV=1	204	KEEELQc
ylide_biotin	5	AGASCPSGGHVADIYLANINK	2	O75044	SLIT-ROBO Rho GTPase-activating protein 2 OS=Homo sapiens OX=9606 GN=SRGAP2 PE=1 SV=3	820	ARAGAScPSGGHV
ylide_biotin	10	SASTAGDIACAFRPVK	6	O75044	SLIT-ROBO Rho GTPase-activating protein 2 OS=Homo sapiens OX=9606 GN=SRGAP2 PE=1 SV=3	1020	TAGDIAcAFRPVK
ylide_biotin	10	TLGESQRTDCSLAR	1	O75044	SLIT-ROBO Rho GTPase-activating protein 2 OS=Homo sapiens OX=9606 GN=SRGAP2 PE=1 SV=3	486	ESQRTDcSLARRS
ylide_biotin	21	TNATSPGVNSSTSPQSTDKSCTV	1	O75044	SLIT-ROBO Rho GTPase-activating protein 2 OS=Homo sapiens OX=9606 GN=SRGAP2 PE=1 SV=3	1069	QSTDKScTV
ylide_biotin	4	QALCPGSTR	1	Q92974	Rho guanine nucleotide exchange factor 2 OS=Homo sapiens OX=9606 GN=ARHGEF2 PE=1 SV=4	306	RRRQALcPGSTRN
ylide_biotin	9	TFNGSIELCRADSDSSQR	1	Q92974	Rho guanine nucleotide exchange factor 2 OS=Homo sapiens OX=9606 GN=ARHGEF2 PE=1 SV=4	715	NGSIELcRADSDS
ylide_biotin	7	KPTPDKCAADVK	3	O94903	Pyridoxal phosphate homeostasis protein OS=Homo sapiens OX=9606 GN=PLPBP PE=1 SV=1	261	KPTPDKcAADVKA
ylide_biotin	6	CCLTYCFNKPEDK	10	P62979	Ubiquitin-40S ribosomal protein S27a OS=Homo sapiens OX=9606 GN=RPS27A PE=1 SV=2	149	KCCLTYcFNKPED
ylide_biotin	7	ECPSDECGAGVFMASHFDR	18	P62979	Ubiquitin-40S ribosomal protein S27a OS=Homo sapiens OX=9606 GN=RPS27A PE=1 SV=2	126	ECPSDEcGAGVFM
ylide_biotin	6	HYCGKCCLTYCFNKPEDK	3	P62979	Ubiquitin-40S ribosomal protein S27a OS=Homo sapiens OX=9606 GN=RPS27A PE=1 SV=2	144	RHYCGKcCLTYCF
ylide_biotin	5	LRRECPSDECGAGVFMASHFDR	9	P62979	Ubiquitin-40S ribosomal protein S27a OS=Homo sapiens OX=9606 GN=RPS27A PE=1 SV=2	121	SRLRREcPSDECG
ylide_biotin	6	FEGKSCSPLAFSAFGDLTIK	1	Q96EY5	Multivesicular body subunit 12A OS=Homo sapiens OX=9606 GN=MVB12A PE=1 SV=1	231	RFEGKScSPLAFS
ylide_biotin	3	MACARPLISVYSEK	11	P36578	60S ribosomal protein L4 OS=Homo sapiens OX=9606 GN=RPL4 PE=1 SV=5	3	MAcARPLIS
ylide_biotin	4	RGPCIIYNEDNGIIK	2	P36578	60S ribosomal protein L4 OS=Homo sapiens OX=9606 GN=RPL4 PE=1 SV=5	208	IQRRGPcIIYNED
ylide_biotin	10	SGQGAFGNMCR	10	P36578	60S ribosomal protein L4 OS=Homo sapiens OX=9606 GN=RPL4 PE=1 SV=5	96	GAFGNMcRGGRMF
ylide_biotin	4	YAICSALAASALPALVMSK	1	P36578	60S ribosomal protein L4 OS=Homo sapiens OX=9606 GN=RPL4 PE=1 SV=5	125	QKRYAIcSALAAS
ylide_biotin	8	AQGSHSKCEEQDRP	1	Q6ICB4	Sesquipedalian-2 OS=Homo sapiens OX=9606 GN=PHETA2 PE=1 SV=1	253	QGSHSKcEEQDRP
ylide_biotin	3	LACKEAVR	1	P17987	T-complex protein 1 subunit alpha OS=Homo sapiens OX=9606 GN=TCP1 PE=1 SV=1	125	SGYRLAcKEAVRY
ylide_biotin	2	ICDDELILIK	2	P17987	T-complex protein 1 subunit alpha OS=Homo sapiens OX=9606 GN=TCP1 PE=1 SV=1	357	VVQERIcDDELIL
ylide_biotin	7	SLHDALCVVKR	1	P17987	T-complex protein 1 subunit alpha OS=Homo sapiens OX=9606 GN=TCP1 PE=1 SV=1	397	SLHDALcVVKRVL
ylide_biotin	17	YINENLIVNTDELGRDCLINAAK	3	P17987	T-complex protein 1 subunit alpha OS=Homo sapiens OX=9606 GN=TCP1 PE=1 SV=1	147	DELGRDcLINAAK
ylide_biotin	4	AQRCDDSPAPR	4	Q9H1J1	Regulator of nonsense transcripts 3A OS=Homo sapiens OX=9606 GN=UPF3A PE=1 SV=1	420	LGRAQRcDDSPAP
ylide_biotin	3	ASCQESAR	3	Q9Y6K9	NF-kappa-B essential modulator OS=Homo sapiens OX=9606 GN=IKBKG PE=1 SV=2	347	SKLKAScQESARI
ylide_biotin	8	EEKEFLMCKFQEAR	2	Q9Y6K9	NF-kappa-B essential modulator OS=Homo sapiens OX=9606 GN=IKBKG PE=1 SV=2	95	EKEFLMcKFQEAR
ylide_biotin	8	LEAATKECQALEGR	2	Q9Y6K9	NF-kappa-B essential modulator OS=Homo sapiens OX=9606 GN=IKBKG PE=1 SV=2	167	EAATKEcQALEGR
ylide_biotin	18	MYDLQYQGGHKEAPSPTCPDLGAK	1	O00257	E3 SUMO-protein ligase CBX4 OS=Homo sapiens OX=9606 GN=CBX4 PE=1 SV=3	185	EAPSPTcPDLGAK
ylide_biotin	12	ALANVNIGSLICNVGAGGPAPAAGAAPAGGPAPSTAAAPAEEK	3	P05386	60S acidic ribosomal protein P1 OS=Homo sapiens OX=9606 GN=RPLP1 PE=1 SV=1	61	NIGSLIcNVGAGG
ylide_biotin	9	MASVSELACIYSALILHDDEVTVTEDKINALIK	1	P05386	60S acidic ribosomal protein P1 OS=Homo sapiens OX=9606 GN=RPLP1 PE=1 SV=1	9	SVSELAcIYSALI
ylide_biotin	12	EKLMHLFTSGDCKAYSPEDLEER	1	Q8WXD5	Gem-associated protein 6 OS=Homo sapiens OX=9606 GN=GEMIN6 PE=1 SV=1	91	LFTSGDcKAYSPE
ylide_biotin	25	NLNDQVLFIDQGNRPLFEDMTDSDCRDNAPR	12	Q14116	Interleukin-18 OS=Homo sapiens OX=9606 GN=IL18 PE=1 SV=1	74	DMTDSDcRDNAPR
ylide_biotin	4	GDECGLALGR	2	P54886	Delta-1-pyrroline-5-carboxylate synthase OS=Homo sapiens OX=9606 GN=ALDH18A1 PE=1 SV=2	88	VTRGDEcGLALGR
ylide_biotin	14	YGWSADESGQIFICSQEESIKPK	1	Q9UBQ5	Eukaryotic translation initiation factor 3 subunit K OS=Homo sapiens OX=9606 GN=EIF3K PE=1 SV=1	190	SGQIFIcSQEESI
ylide_biotin	10	SDEENLKEECSSTESTQQEHEDAPSTK	1	Q86UU1	Pleckstrin homology-like domain family B member 1 OS=Homo sapiens OX=9606 GN=PHLDB1 PE=1 SV=1	691	ENLKEEcSSTEST
ylide_biotin	7	IVAPRGCQDFGWDPCFQPDGYEQTYAEMPK	7	Q9BY32	Inosine triphosphate pyrophosphatase OS=Homo sapiens OX=9606 GN=ITPA PE=1 SV=2	146	IVAPRGcQDFGWD
ylide_biotin	5	VQGVCFRMYTEDEAR	4	P14621	Acylphosphatase-2 OS=Homo sapiens OX=9606 GN=ACYP2 PE=1 SV=2	22	GRVQGVcFRMYTE
ylide_biotin	5	AANSCTSYSGTTLNLK	1	Q9UPQ0	LIM and calponin homology domains-containing protein 1 OS=Homo sapiens OX=9606 GN=LIMCH1 PE=1 SV=4	140	GKAANScTSYSGT
ylide_biotin	2	ECPTVAPAHSLTK	1	Q9UPQ0	LIM and calponin homology domains-containing protein 1 OS=Homo sapiens OX=9606 GN=LIMCH1 PE=1 SV=4	577	EEKEREcPTVAPA
ylide_biotin	6	IDLGNCQDEK	5	Q9UPQ0	LIM and calponin homology domains-containing protein 1 OS=Homo sapiens OX=9606 GN=LIMCH1 PE=1 SV=4	863	KIDLGNcQDEKQD
ylide_biotin	11	IRNGLLNCNDCYMR	1	Q9UPQ0	LIM and calponin homology domains-containing protein 1 OS=Homo sapiens OX=9606 GN=LIMCH1 PE=1 SV=4	1070	LLNCNDcYMRSRS
ylide_biotin	17	TPVSDDAESTSMFDMRCEEEAAVQPHSR	2	Q9UPQ0	LIM and calponin homology domains-containing protein 1 OS=Homo sapiens OX=9606 GN=LIMCH1 PE=1 SV=4	333	SMFDMRcEEEAAV
ylide_biotin	6	TPGGLCR	1	Q9Y2U8	Inner nuclear membrane protein Man1 OS=Homo sapiens OX=9606 GN=LEMD3 PE=1 SV=2	108	RTPGGLcRISASG
ylide_biotin	6	ESSYACYYDEKR	4	Q99538	Legumain OS=Homo sapiens OX=9606 GN=LGMN PE=1 SV=1	219	RESSYAcYYDEKR
ylide_biotin	6	HQADACHAYQIIHR	2	Q99538	Legumain OS=Homo sapiens OX=9606 GN=LGMN PE=1 SV=1	50	RHQADAcHAYQII
ylide_biotin	3	EACTCPYCK	2	P08047	Transcription factor Sp1 OS=Homo sapiens OX=9606 GN=SP1 PE=1 SV=3	604	RTRREAcTCPYCK
ylide_biotin	8	EACTCPYCKDSEGR	1	P08047	Transcription factor Sp1 OS=Homo sapiens OX=9606 GN=SP1 PE=1 SV=3	609	ACTCPYcKDSEGR
ylide_biotin	6	AVDQVCTFLFK	5	O15541	E3 ubiquitin-protein ligase RNF113A OS=Homo sapiens OX=9606 GN=RNF113A PE=1 SV=1	15	KAVDQVcTFLFKK
ylide_biotin	6	VTLTRCFYLFPGH	2	P29466	Caspase-1 OS=Homo sapiens OX=9606 GN=CASP1 PE=1 SV=1	397	RVTLTRcFYLFPG
ylide_biotin	5	LHTRCGG	1	Q5BKU9	Oxidoreductase-like domain-containing protein 1 OS=Homo sapiens OX=9606 GN=OXLD1 PE=2 SV=1	145	IRLHTRcGG
ylide_biotin	3	KCCIPETR	1	Q9BYT8	Neurolysin, mitochondrial OS=Homo sapiens OX=9606 GN=NLN PE=1 SV=1	256	PVMKKCcIPETRR
ylide_biotin	4	EKECGVTATFDASR	1	P49757	Protein numb homolog OS=Homo sapiens OX=9606 GN=NUMB PE=1 SV=2	176	QKREKEcGVTATF
ylide_biotin	9	HTEVPTGTCPVDPFEAQWAALENK	3	P49757	Protein numb homolog OS=Homo sapiens OX=9606 GN=NUMB PE=1 SV=2	611	EVPTGTcPVDPFE
ylide_biotin	6	TIDAGCKPYMAPER	2	P52564	Dual specificity mitogen-activated protein kinase kinase 6 OS=Homo sapiens OX=9606 GN=MAP2K6 PE=1 SV=1	216	KTIDAGcKPYMAP
ylide_biotin	4	NVTCQDTR	1	Q8N511	Transmembrane protein 199 OS=Homo sapiens OX=9606 GN=TMEM199 PE=1 SV=1	124	ITRNVTcQDTRHG
ylide_biotin	7	ATKDGQCESQDPR	1	Q9Y2F5	Little elongation complex subunit 1 OS=Homo sapiens OX=9606 GN=ICE1 PE=1 SV=5	752	ATKDGQcESQDPR
ylide_biotin	9	TGSSSGGDCNQDKSR	2	Q9Y2F5	Little elongation complex subunit 1 OS=Homo sapiens OX=9606 GN=ICE1 PE=1 SV=5	1817	SSSGGDcNQDKSR
ylide_biotin	9	REEEEDDDCPVRK	1	Q8IWD4	Coiled-coil domain-containing protein 117 OS=Homo sapiens OX=9606 GN=CCDC117 PE=1 SV=1	81	EEEDDDcPVRKKR
ylide_biotin	3	ALCVHAAK	1	P49419	Alpha-aminoadipic semialdehyde dehydrogenase OS=Homo sapiens OX=9606 GN=ALDH7A1 PE=1 SV=5	9	RLPRALcVHAAKT
ylide_biotin	7	TPTKPPCQ	1	Q96L91	E1A-binding protein p400 OS=Homo sapiens OX=9606 GN=EP400 PE=1 SV=4	3158	TPTKPPcQ
ylide_biotin	5	ACFRCAK	2	P21291	Cysteine and glycine-rich protein 1 OS=Homo sapiens OX=9606 GN=CSRP1 PE=1 SV=3	146	HKACFRcAKCGKG
ylide_biotin	4	CPRCSQAVYAAEK	3	P21291	Cysteine and glycine-rich protein 1 OS=Homo sapiens OX=9606 GN=CSRP1 PE=1 SV=3	122	SERCPRcSQAVYA
ylide_biotin	2	GCYAKNFGPK	2	P21291	Cysteine and glycine-rich protein 1 OS=Homo sapiens OX=9606 GN=CSRP1 PE=1 SV=3	170	EIYCKGcYAKNFG
ylide_biotin	7	IGGSERCPR	4	P21291	Cysteine and glycine-rich protein 1 OS=Homo sapiens OX=9606 GN=CSRP1 PE=1 SV=3	119	IGGSERcPRCSQA
ylide_biotin	19	NLDSTTVAVHGEEIYCKSCYGKK	1	P21291	Cysteine and glycine-rich protein 1 OS=Homo sapiens OX=9606 GN=CSRP1 PE=1 SV=3	61	EIYCKScYGKKYG
ylide_biotin	2	SCFLCMVCKK	1	P21291	Cysteine and glycine-rich protein 1 OS=Homo sapiens OX=9606 GN=CSRP1 PE=1 SV=3	34	NSFHKScFLCMVC
ylide_biotin	6	SWHKACFR	2	P21291	Cysteine and glycine-rich protein 1 OS=Homo sapiens OX=9606 GN=CSRP1 PE=1 SV=3	143	KSWHKAcFRCAKC
ylide_biotin	10	TVYFAEEVQCEGNSFHK	8	P21291	Cysteine and glycine-rich protein 1 OS=Homo sapiens OX=9606 GN=CSRP1 PE=1 SV=3	25	FAEEVQcEGNSFH
ylide_biotin	10	SPQSPGGNICHLGAPK	1	Q9H609	Zinc finger protein 576 OS=Homo sapiens OX=9606 GN=ZNF576 PE=1 SV=1	29	SPGGNIcHLGAPK
ylide_biotin	5	KGDECELLGHSK	1	P49411	Elongation factor Tu, mitochondrial OS=Homo sapiens OX=9606 GN=TUFM PE=1 SV=2	290	LKKGDEcELLGHS
ylide_biotin	11	FVQSEAQQERCSQNK	1	O00311	Cell division cycle 7-related protein kinase OS=Homo sapiens OX=9606 GN=CDC7 PE=1 SV=1	223	EAQQERcSQNKSH
ylide_biotin	7	AITTQNCNTK	2	Q15796	Mothers against decapentaplegic homolog 2 OS=Homo sapiens OX=9606 GN=SMAD2 PE=1 SV=1	70	AITTQNcNTKCVT
ylide_biotin	12	VLTQMGSPSVRCSSMS	1	Q15796	Mothers against decapentaplegic homolog 2 OS=Homo sapiens OX=9606 GN=SMAD2 PE=1 SV=1	463	GSPSVRcSSMS
ylide_biotin	3	TPCKGGIR	1	P00367	Glutamate dehydrogenase 1, mitochondrial OS=Homo sapiens OX=9606 GN=GLUD1 PE=1 SV=2	146	SQHRTPcKGGIRY
ylide_biotin	4	EKMCLWSTDAISK	2	Q7L3B6	Hsp90 co-chaperone Cdc37-like 1 OS=Homo sapiens OX=9606 GN=CDC37L1 PE=1 SV=1	124	VQREKMcLWSTDA
ylide_biotin	5	SSVACKWNLAEAQQK	1	Q7L3B6	Hsp90 co-chaperone Cdc37-like 1 OS=Homo sapiens OX=9606 GN=CDC37L1 PE=1 SV=1	67	VKSSVAcKWNLAE
ylide_biotin	10	FDEKENVSNCIQLK	4	Q9ULC4	Malignant T-cell-amplified sequence 1 OS=Homo sapiens OX=9606 GN=MCTS1 PE=1 SV=1	14	KENVSNcIQLKTS
ylide_biotin	3	TACRDNTSVYHISGK	1	Q9NTJ3	Structural maintenance of chromosomes protein 4 OS=Homo sapiens OX=9606 GN=SMC4 PE=1 SV=2	190	YVSRTAcRDNTSV
ylide_biotin	3	GSCLESGGHSNDR	1	Q6ZSR9	Uncharacterized protein FLJ45252 OS=Homo sapiens OX=9606 PE=2 SV=2	251	ISPRGScLESGGH
ylide_biotin	7	SLQPCECHQIK	1	Q9NW82	WD repeat-containing protein 70 OS=Homo sapiens OX=9606 GN=WDR70 PE=1 SV=1	229	SLQPCEcHQIKSL
ylide_biotin	6	LKCPYCPMEQNPADGKR	1	Q96G75	E3 ubiquitin-protein transferase RMND5B OS=Homo sapiens OX=9606 GN=RMND5B PE=1 SV=1	379	KLKCPYcPMEQNP
ylide_biotin	7	LILDVFCGSQMHFVR	2	P11413	Glucose-6-phosphate 1-dehydrogenase OS=Homo sapiens OX=9606 GN=G6PD PE=1 SV=4	446	LILDVFcGSQMHF
ylide_biotin	4	LLQCDPSSASQF	3	P37235	Hippocalcin-like protein 1 OS=Homo sapiens OX=9606 GN=HPCAL1 PE=1 SV=3	185	IVRLLQcDPSSAS
ylide_biotin	6	GQPNQCVGHR	1	Q8NBP7	Proprotein convertase subtilisin/kexin type 9 OS=Homo sapiens OX=9606 GN=PCSK9 PE=1 SV=3	588	RGQPNQcVGHREA
ylide_biotin	7	TIISMPCKYSR	1	Q5TGL8	PX domain-containing protein 1 OS=Homo sapiens OX=9606 GN=PXDC1 PE=2 SV=3	115	TIISMPcKYSRSE
ylide_biotin	8	MAAAEEGCSVGAEADRELEELLESALDDFDK	2	P40855	Peroxisomal biogenesis factor 19 OS=Homo sapiens OX=9606 GN=PEX19 PE=1 SV=1	8	AAAEEGcSVGAEA
ylide_biotin	14	VGSDMTSQQEFTSCLKETLSGLAK	1	P40855	Peroxisomal biogenesis factor 19 OS=Homo sapiens OX=9606 GN=PEX19 PE=1 SV=1	128	QQEFTScLKETLS
ylide_biotin	7	MVEFLQCTVPCR	2	Q96D46	60S ribosomal export protein NMD3 OS=Homo sapiens OX=9606 GN=NMD3 PE=1 SV=1	214	MVEFLQcTVPCRY
ylide_biotin	5	VAGDCLDEK	2	Q96AG4	Leucine-rich repeat-containing protein 59 OS=Homo sapiens OX=9606 GN=LRRC59 PE=1 SV=1	131	AKVAGDcLDEKQC
ylide_biotin	3	LQCPTCIK	1	P53582	Methionine aminopeptidase 1 OS=Homo sapiens OX=9606 GN=METAP1 PE=1 SV=2	22	SEAKLQcPTCIKL
ylide_biotin	3	SYCGHGIHK	3	P53582	Methionine aminopeptidase 1 OS=Homo sapiens OX=9606 GN=METAP1 PE=1 SV=2	292	SVVRSYcGHGIHK
ylide_biotin	7	VCETDGCSSEAK	4	P53582	Methionine aminopeptidase 1 OS=Homo sapiens OX=9606 GN=METAP1 PE=1 SV=2	14	VCETDGcSSEAKL
ylide_biotin	17	TKPQGDQDTGKEADDGCALGGR	1	O75127	Pentatricopeptide repeat-containing protein 1, mitochondrial OS=Homo sapiens OX=9606 GN=PTCD1 PE=1 SV=2	695	KEADDGcALGGR
ylide_biotin	9	LEHEEGAPCTAIR	1	Q07002	Cyclin-dependent kinase 18 OS=Homo sapiens OX=9606 GN=CDK18 PE=1 SV=4	185	HEEGAPcTAIREV
ylide_biotin	9	AFSQSSSLCIHQR	2	Q8N3J9	Zinc finger protein 664 OS=Homo sapiens OX=9606 GN=ZNF664 PE=1 SV=1	187	SQSSSLcIHQRVH
ylide_biotin	9	AFSQSSSLCIHQR	2	Q8N3J9	Zinc finger protein 664 OS=Homo sapiens OX=9606 GN=ZNF664 PE=1 SV=1	215	SQSSSLcIHQRVH
ylide_biotin	6	ERPSPCNGRK	1	Q9Y4B6	DDB1- and CUL4-associated factor 1 OS=Homo sapiens OX=9606 GN=DCAF1 PE=1 SV=3	967	RERPSPcNGRKIR
ylide_biotin	6	VTLHICASTK	2	Q5SWX8	Protein odr-4 homolog OS=Homo sapiens OX=9606 GN=ODR4 PE=1 SV=1	141	RVTLHIcASTKKI
ylide_biotin	7	YVEAKDCLNVLNK	1	Q99471	Prefoldin subunit 5 OS=Homo sapiens OX=9606 GN=PFDN5 PE=1 SV=2	49	YVEAKDcLNVLNK
ylide_biotin	15	WTQTLSELDLAVPFCVNFR	1	Q9Y266	Nuclear migration protein nudC OS=Homo sapiens OX=9606 GN=NUDC PE=1 SV=1	188	DLAVPFcVNFRLK
ylide_biotin	6	NSYTNCLQK	2	Q92766	Ras-responsive element-binding protein 1 OS=Homo sapiens OX=9606 GN=RREB1 PE=1 SV=3	1242	RNSYTNcLQKITC
ylide_biotin	8	DLQAEALCK	4	Q99933	BAG family molecular chaperone regulator 1 OS=Homo sapiens OX=9606 GN=BAG1 PE=1 SV=4	272	LQAEALcKLDRRV
ylide_biotin	11	TGTAQPGTQTCSTSTQSK	1	Q9H2F5	Enhancer of polycomb homolog 1 OS=Homo sapiens OX=9606 GN=EPC1 PE=1 SV=1	566	QPGTQTcSTSTQS
ylide_biotin	8	GCAGGCECGDKGK	1	Q9NYP9	Protein Mis18-alpha OS=Homo sapiens OX=9606 GN=MIS18A PE=1 SV=1	19	CAGGCEcGDKGKC
ylide_biotin	6	LSFATCKS	1	Q9NYP9	Protein Mis18-alpha OS=Homo sapiens OX=9606 GN=MIS18A PE=1 SV=1	231	KLSFATcKS
ylide_biotin	7	DTSFTVCPDVPRTPVGK	1	P30307	M-phase inducer phosphatase 3 OS=Homo sapiens OX=9606 GN=CDC25C PE=1 SV=2	42	DTSFTVcPDVPRT
ylide_biotin	4	MSQCTSSTIPSSSQEKDPK	1	Q9Y6Q9	Nuclear receptor coactivator 3 OS=Homo sapiens OX=9606 GN=NCOA3 PE=1 SV=1	769	DNKMSQcTSSTIP
ylide_biotin	6	SMFIACAGKK	1	P09884	DNA polymerase alpha catalytic subunit OS=Homo sapiens OX=9606 GN=POLA1 PE=1 SV=2	141	KSMFIAcAGKKTA
ylide_biotin	7	ASVSTKCNLEDQVK	1	Q5JRA6	Transport and Golgi organization protein 1 homolog OS=Homo sapiens OX=9606 GN=MIA3 PE=1 SV=1	1486	ASVSTKcNLEDQV
ylide_biotin	6	FLIKNCNDFQYESK	2	Q04917	14-3-3 protein eta OS=Homo sapiens OX=9606 GN=YWHAH PE=1 SV=4	112	KFLIKNcNDFQYE
ylide_biotin	4	NWACFTGK	1	P53634	Dipeptidyl peptidase 1 OS=Homo sapiens OX=9606 GN=CTSC PE=1 SV=2	136	LGRNWAcFTGKKV
ylide_biotin	6	IGQGHCVSGMGMGR	1	P35555	Fibrillin-1 OS=Homo sapiens OX=9606 GN=FBN1 PE=1 SV=4	2686	RIGQGHcVSGMGM
ylide_biotin	5	SIQHCNIR	1	P35555	Fibrillin-1 OS=Homo sapiens OX=9606 GN=FBN1 PE=1 SV=4	119	SRSIQHcNIRCMN
ylide_biotin	2	VCVDTHMR	2	P35555	Fibrillin-1 OS=Homo sapiens OX=9606 GN=FBN1 PE=1 SV=4	652	GLDGRVcVDTHMR
ylide_biotin	3	IICRDVAR	1	Q96KQ7	Histone-lysine N-methyltransferase EHMT2 OS=Homo sapiens OX=9606 GN=EHMT2 PE=1 SV=3	923	RTEKIIcRDVARG
ylide_biotin	13	MFHPNVYADGSICLDILQNR	1	P49459	Ubiquitin-conjugating enzyme E2 A OS=Homo sapiens OX=9606 GN=UBE2A PE=1 SV=2	88	YADGSIcLDILQN
ylide_biotin	13	RVSAIVEQSWRDC	2	P49459	Ubiquitin-conjugating enzyme E2 A OS=Homo sapiens OX=9606 GN=UBE2A PE=1 SV=2	152	EQSWRDc
ylide_biotin	7	NSSDLGCKEGADK	4	Q9NV56	MRG/MORF4L-binding protein OS=Homo sapiens OX=9606 GN=MRGBP PE=1 SV=1	170	NSSDLGcKEGADK
ylide_biotin	3	SFCSAPSLRR	1	Q8N1G0	Zinc finger protein 687 OS=Homo sapiens OX=9606 GN=ZNF687 PE=1 SV=1	1003	LCERSFcSAPSLR
ylide_biotin	6	TIKTSCGNITR	2	Q8N1G0	Zinc finger protein 687 OS=Homo sapiens OX=9606 GN=ZNF687 PE=1 SV=1	339	KTIKTScGNITRT
ylide_biotin	14	VEDGAQQCLDCGLCFASPGSLSR	1	Q8N1G0	Zinc finger protein 687 OS=Homo sapiens OX=9606 GN=ZNF687 PE=1 SV=1	1143	CLDCGLcFASPGS
ylide_biotin	14	GLQVGGCEPEPQVC	1	P52888	Thimet oligopeptidase OS=Homo sapiens OX=9606 GN=THOP1 PE=1 SV=2	689	EPEPQVc
ylide_biotin	7	MKPPAACAGDMADAASPCSVVNDLR	6	P52888	Thimet oligopeptidase OS=Homo sapiens OX=9606 GN=THOP1 PE=1 SV=2	7	MKPPAAcAGDMAD
ylide_biotin	9	ISQETEQRCESLNTR	1	P52732	Kinesin-like protein KIF11 OS=Homo sapiens OX=9606 GN=KIF11 PE=1 SV=2	819	QETEQRcESLNTR
ylide_biotin	18	MPVHTLSPGAPSAPALPCRLR	1	Q9BQ89	Protein FAM110A OS=Homo sapiens OX=9606 GN=FAM110A PE=1 SV=1	18	SAPALPcRLRTRV
ylide_biotin	7	LEVSSSCGPQCHK	1	O95084	Serine protease 23 OS=Homo sapiens OX=9606 GN=PRSS23 PE=1 SV=1	65	LEVSSScGPQCHK
ylide_biotin	21	VVGSVGQHTGEPVEELALSHCGR	1	Q9H6Y2	WD repeat-containing protein 55 OS=Homo sapiens OX=9606 GN=WDR55 PE=1 SV=2	306	ELALSHcGRFLAS
ylide_biotin	4	GPVCWR	3	Q15910	Histone-lysine N-methyltransferase EZH2 OS=Homo sapiens OX=9606 GN=EZH2 PE=1 SV=2	14	SEKGPVcWRKRVK
ylide_biotin	4	NTPCSENKLDIQEK	1	Q9H2U1	ATP-dependent DNA/RNA helicase DHX36 OS=Homo sapiens OX=9606 GN=DHX36 PE=1 SV=2	135	STKNTPcSENKLD
ylide_biotin	2	SCTDSELLLHPELLSQEFLLLTLEQK	1	Q9BVC5	Ashwin OS=Homo sapiens OX=9606 GN=C2orf49 PE=1 SV=1	10	DVGGRScTDSELL
ylide_biotin	9	AGTDSPVSCASVTEER	2	Q69YH5	Cell division cycle-associated protein 2 OS=Homo sapiens OX=9606 GN=CDCA2 PE=1 SV=2	714	TDSPVScASVTEE
ylide_biotin	7	SPATPACRRDLPTPK	1	Q69YH5	Cell division cycle-associated protein 2 OS=Homo sapiens OX=9606 GN=CDCA2 PE=1 SV=2	315	SPATPAcRRDLPT
ylide_biotin	6	SQETKCTKR	1	Q69YH5	Cell division cycle-associated protein 2 OS=Homo sapiens OX=9606 GN=CDCA2 PE=1 SV=2	547	KSQETKcTKRALP
ylide_biotin	6	AAREECPVFTPPGGETLDQVK	2	Q9NQ88	Fructose-2,6-bisphosphatase TIGAR OS=Homo sapiens OX=9606 GN=TIGAR PE=1 SV=1	114	KAAREEcPVFTPP
ylide_biotin	11	EQFSQGSPSNCLETSLAEIFPLGK	1	Q9NQ88	Fructose-2,6-bisphosphatase TIGAR OS=Homo sapiens OX=9606 GN=TIGAR PE=1 SV=1	161	QGSPSNcLETSLA
ylide_biotin	9	KVFANPEDCVAFGKGENAK	2	P10620	Microsomal glutathione S-transferase 1 OS=Homo sapiens OX=9606 GN=MGST1 PE=1 SV=1	50	FANPEDcVAFGKG
ylide_biotin	3	QQCEFAK	2	Q9NVZ3	Adaptin ear-binding coat-associated protein 2 OS=Homo sapiens OX=9606 GN=NECAP2 PE=1 SV=1	133	KWVKQQcEFAKQA
ylide_biotin	4	RAACAQKK	2	Q5VZK9	F-actin-uncapping protein LRRC16A OS=Homo sapiens OX=9606 GN=CARMIL1 PE=1 SV=1	1181	QEKRAAcAQKKLG
ylide_biotin	9	FQAECPHLCETSLAGR	1	Q99956	Dual specificity protein phosphatase 9 OS=Homo sapiens OX=9606 GN=DUSP9 PE=1 SV=1	138	AECPHLcETSLAG
ylide_biotin	3	TPCSSLLPLLNAHAATSGK	1	Q9NUQ6	SPATS2-like protein OS=Homo sapiens OX=9606 GN=SPATS2L PE=1 SV=2	367	YSSRTPcSSLLPL
ylide_biotin	32	HVGDLGNVTADKDGVADVSIEDSVISLSGDHCIIGR	1	P00441	Superoxide dismutase [Cu-Zn] OS=Homo sapiens OX=9606 GN=SOD1 PE=1 SV=2	112	SLSGDHcIIGRTL
ylide_biotin	2	SCTSDTK	1	Q5TAP6	U3 small nucleolar RNA-associated protein 14 homolog C OS=Homo sapiens OX=9606 GN=UTP14C PE=1 SV=1	378	PWMFRScTSDTKE
ylide_biotin	13	AAASGQPRPEMQCPAEHEEDMYR	1	Q96BN8	Ubiquitin thioesterase otulin OS=Homo sapiens OX=9606 GN=OTULIN PE=1 SV=3	47	PRPEMQcPAEHEE
ylide_biotin	3	ATCMKMGYEEVSQK	2	Q96BN8	Ubiquitin thioesterase otulin OS=Homo sapiens OX=9606 GN=OTULIN PE=1 SV=3	105	NTQKATcMKMGYE
ylide_biotin	7	VTDDLVCLVYK	7	P49458	Signal recognition particle 9 kDa protein OS=Homo sapiens OX=9606 GN=SRP9 PE=1 SV=2	48	VTDDLVcLVYKTD
ylide_biotin	6	NGLQSCPIKEDSFLQR	1	P00533	Epidermal growth factor receptor OS=Homo sapiens OX=9606 GN=EGFR PE=1 SV=2	1058	RNGLQScPIKEDS
ylide_biotin	7	YSFGATCVKK	1	P00533	Epidermal growth factor receptor OS=Homo sapiens OX=9606 GN=EGFR PE=1 SV=2	291	YSFGATcVKKCPR
ylide_biotin	4	GHSCYRPR	8	P62753	40S ribosomal protein S6 OS=Homo sapiens OX=9606 GN=RPS6 PE=1 SV=1	83	LSKGHScYRPRRT
ylide_biotin	6	KSVRGCIVDANLSVLNLVIVK	1	P62753	40S ribosomal protein S6 OS=Homo sapiens OX=9606 GN=RPS6 PE=1 SV=1	100	RKSVRGcIVDANL
ylide_biotin	10	LNISFPATGCQK	9	P62753	40S ribosomal protein S6 OS=Homo sapiens OX=9606 GN=RPS6 PE=1 SV=1	12	SFPATGcQKLIEV
ylide_biotin	5	SQAPCANKDEADLSSK	2	Q96SK2	Transmembrane protein 209 OS=Homo sapiens OX=9606 GN=TMEM209 PE=1 SV=2	301	CRSQAPcANKDEA
ylide_biotin	23	VSESEGKLEGQATAVTPNKNSSCGGGISSSSSSR	1	Q9BXB4	Oxysterol-binding protein-related protein 11 OS=Homo sapiens OX=9606 GN=OSBPL11 PE=1 SV=2	34	PNKNSScGGGISS
ylide_biotin	4	LRGCGPR	2	Q8NF37	Lysophosphatidylcholine acyltransferase 1 OS=Homo sapiens OX=9606 GN=LPCAT1 PE=1 SV=2	6	MRLRGcGPRAAP
ylide_biotin	3	WFCHIQHYPGIR	1	O43324	Eukaryotic translation elongation factor 1 epsilon-1 OS=Homo sapiens OX=9606 GN=EEF1E1 PE=1 SV=1	147	NVSRWFcHIQHYP
ylide_biotin	12	QVLDYPSPDVECAKK	1	Q9P270	SLAIN motif-containing protein 2 OS=Homo sapiens OX=9606 GN=SLAIN2 PE=1 SV=2	165	PSPDVEcAKKSLI
ylide_biotin	7	RSSGSSCNSTR	1	Q9P270	SLAIN motif-containing protein 2 OS=Homo sapiens OX=9606 GN=SLAIN2 PE=1 SV=2	306	RSSGSScNSTRRG
ylide_biotin	14	TYGSMKDDSWKDGCY	1	Q9P270	SLAIN motif-containing protein 2 OS=Homo sapiens OX=9606 GN=SLAIN2 PE=1 SV=2	580	DSWKDGcY
ylide_biotin	6	DFTPVCTTELGR	4	P30041	Peroxiredoxin-6 OS=Homo sapiens OX=9606 GN=PRDX6 PE=1 SV=3	47	RDFTPVcTTELGR
ylide_biotin	7	DINAYNCEEPTEK	7	P30041	Peroxiredoxin-6 OS=Homo sapiens OX=9606 GN=PRDX6 PE=1 SV=3	91	DINAYNcEEPTEK
ylide_biotin	2	GCLDEETSR	1	Q15149	Plectin OS=Homo sapiens OX=9606 GN=PLEC PE=1 SV=3	3299	VACARGcLDEETS
ylide_biotin	10	MVEGYQGLRCDNFTSSWR	1	Q15149	Plectin OS=Homo sapiens OX=9606 GN=PLEC PE=1 SV=3	317	GYQGLRcDNFTSS
ylide_biotin	4	YLTCPKTK	4	Q15149	Plectin OS=Homo sapiens OX=9606 GN=PLEC PE=1 SV=3	4574	YSKYLTcPKTKLK
ylide_biotin	3	YSCDRSATVTR	1	Q15149	Plectin OS=Homo sapiens OX=9606 GN=PLEC PE=1 SV=3	888	LRRKYScDRSATV
ylide_biotin	16	ILHCLGLAEEIQKYCCSRK	1	P53004	Biliverdin reductase A OS=Homo sapiens OX=9606 GN=BLVRA PE=1 SV=2	293	EIQKYCcSRK
ylide_biotin	4	MTVCLETEKK	2	P53004	Biliverdin reductase A OS=Homo sapiens OX=9606 GN=BLVRA PE=1 SV=2	204	YMKMTVcLETEKK
ylide_biotin	7	LTDTAGCRGSSAVLNVTPK	2	A2RUS2	DENN domain-containing protein 3 OS=Homo sapiens OX=9606 GN=DENND3 PE=1 SV=2	499	LTDTAGcRGSSAV
ylide_biotin	9	GGSLESDGCPKEPAK	2	P51608	Methyl-CpG-binding protein 2 OS=Homo sapiens OX=9606 GN=MECP2 PE=1 SV=1	429	SLESDGcPKEPAK
ylide_biotin	5	GLKTCKSPGR	1	P51608	Methyl-CpG-binding protein 2 OS=Homo sapiens OX=9606 GN=MECP2 PE=1 SV=1	339	GKGLKTcKSPGRK
ylide_biotin	6	ENFPLCGRDVAR	1	Q9BT17	Mitochondrial ribosome-associated GTPase 1 OS=Homo sapiens OX=9606 GN=MTG1 PE=1 SV=2	23	RENFPLcGRDVAR
ylide_biotin	3	CFCRSK	1	Q9Y2V2	Calcium-regulated heat-stable protein 1 OS=Homo sapiens OX=9606 GN=CARHSP1 PE=1 SV=2	71	GVCKCFcRSKGHG
ylide_biotin	18	EGSADVEPNQESLVAEACDTPEHWEAVPQSLAGR	1	Q12774	Rho guanine nucleotide exchange factor 5 OS=Homo sapiens OX=9606 GN=ARHGEF5 PE=1 SV=3	98	SLVAEAcDTPEHW
ylide_biotin	5	YYSPCEEHPAETNQNEGSESGTIR	1	Q12774	Rho guanine nucleotide exchange factor 5 OS=Homo sapiens OX=9606 GN=ARHGEF5 PE=1 SV=3	186	TRYYSPcEEHPAE
ylide_biotin	6	MESVSCSAAAVR	4	Q15814	Tubulin-specific chaperone C OS=Homo sapiens OX=9606 GN=TBCC PE=1 SV=2	6	MESVScSAAAVR
ylide_biotin	5	ARLECEINTYR	2	Q92764	Keratin, type I cuticular Ha5 OS=Homo sapiens OX=9606 GN=KRT35 PE=1 SV=5	392	VRARLEcEINTYR
ylide_biotin	6	GRSELCLDLPDPPEDPVALETR	1	Q63ZY3	KN motif and ankyrin repeat domain-containing protein 2 OS=Homo sapiens OX=9606 GN=KANK2 PE=1 SV=1	249	RGRSELcLDLPDP
ylide_biotin	6	TSRQECQLSR	2	Q63ZY3	KN motif and ankyrin repeat domain-containing protein 2 OS=Homo sapiens OX=9606 GN=KANK2 PE=1 SV=1	562	KTSRQEcQLSRES
ylide_biotin	5	QQVICKLSEK	1	Q9BYX2	TBC1 domain family member 2A OS=Homo sapiens OX=9606 GN=TBC1D2 PE=1 SV=3	419	AKQQVIcKLSEKV
ylide_biotin	3	HLCRQTLPSVR	2	Q9Y6W5	Wiskott-Aldrich syndrome protein family member 2 OS=Homo sapiens OX=9606 GN=WASF2 PE=1 SV=3	14	IEPRHLcRQTLPS
ylide_biotin	14	LLDGLAQAQAEGRCR	2	Q01970	1-phosphatidylinositol 4,5-bisphosphate phosphodiesterase beta-3 OS=Homo sapiens OX=9606 GN=PLCB3 PE=1 SV=2	1005	AQAEGRcRLRPGA
ylide_biotin	4	QKPCAQEVPGR	1	Q6AW86	Zinc finger protein 324B OS=Homo sapiens OX=9606 GN=ZNF324B PE=1 SV=1	198	PERQKPcAQEVPG
ylide_biotin	15	IGPIKPAGPVTAVPCDDKIFYNSGPK	1	Q9H7E2	Tudor domain-containing protein 3 OS=Homo sapiens OX=9606 GN=TDRD3 PE=1 SV=1	521	PVTAVPcDDKIFY
ylide_biotin	6	GEAQRCPR	1	P10606	Cytochrome c oxidase subunit 5B, mitochondrial OS=Homo sapiens OX=9606 GN=COX5B PE=1 SV=2	113	KGEAQRcPRCGAH
ylide_biotin	2	VCVDTEIK	1	Q9BZE2	tRNA pseudouridine(38/39) synthase OS=Homo sapiens OX=9606 GN=PUS3 PE=1 SV=3	472	TPTKRVcVDTEIK
ylide_biotin	7	NIDPKPCTPR	3	Q96EP5	DAZ-associated protein 1 OS=Homo sapiens OX=9606 GN=DAZAP1 PE=1 SV=1	85	NIDPKPcTPRGMQ
ylide_biotin	9	SSALLGAQCQGVR	1	O15037	Protein KHNYN OS=Homo sapiens OX=9606 GN=KHNYN PE=1 SV=3	221	ALLGAQcQGVRAP
ylide_biotin	4	EGRCSHSLN	5	Q16637	Survival motor neuron protein OS=Homo sapiens OX=9606 GN=SMN1 PE=1 SV=1	289	NQKEGRcSHSLN
ylide_biotin	9	HALKNGDICETSGKPK	6	Q16637	Survival motor neuron protein OS=Homo sapiens OX=9606 GN=SMN1 PE=1 SV=1	60	LKNGDIcETSGKP
ylide_biotin	9	AKVDEFPLCGHMVSDEYEQLSSEALEAAR	1	P27635	60S ribosomal protein L10 OS=Homo sapiens OX=9606 GN=RPL10 PE=1 SV=4	49	VDEFPLcGHMVSD
ylide_biotin	5	CYRYCK	2	P27635	60S ribosomal protein L10 OS=Homo sapiens OX=9606 GN=RPL10 PE=1 SV=4	12	ARCYRYcKNKPYP
ylide_biotin	2	FCRGVPDAK	9	P27635	60S ribosomal protein L10 OS=Homo sapiens OX=9606 GN=RPL10 PE=1 SV=4	23	YPKSRFcRGVPDA
ylide_biotin	2	ICANKYMVK	3	P27635	60S ribosomal protein L10 OS=Homo sapiens OX=9606 GN=RPL10 PE=1 SV=4	71	LEAARIcANKYMV
ylide_biotin	6	LIPDGCGVK	37	P27635	60S ribosomal protein L10 OS=Homo sapiens OX=9606 GN=RPL10 PE=1 SV=4	195	RLIPDGcGVKYIP
ylide_biotin	7	INKMLSCAGADRLQTGMR	2	P27635	60S ribosomal protein L10 OS=Homo sapiens OX=9606 GN=RPL10 PE=1 SV=4	105	INKMLScAGADRL
ylide_biotin	2	SCGKDGFHIR	20	P27635	60S ribosomal protein L10 OS=Homo sapiens OX=9606 GN=RPL10 PE=1 SV=4	80	KYMVKScGKDGFH
ylide_biotin	6	IPGPVCKGK	1	Q8TDN6	Ribosome biogenesis protein BRX1 homolog OS=Homo sapiens OX=9606 GN=BRIX1 PE=1 SV=2	52	RIPGPVcKGKWKN
ylide_biotin	7	ESESKTCLGTESSK	1	Q6PJW8	Consortin OS=Homo sapiens OX=9606 GN=CNST PE=1 SV=3	317	ESESKTcLGTESS
ylide_biotin	11	SKTEPLISPGCDRIPPALISEGK	1	Q6PJW8	Consortin OS=Homo sapiens OX=9606 GN=CNST PE=1 SV=3	439	PLISPGcDRIPPA
ylide_biotin	6	DGKKECDIVSR	2	Q7Z460	CLIP-associating protein 1 OS=Homo sapiens OX=9606 GN=CLASP1 PE=1 SV=1	1212	RDGKKEcDIVSRD
ylide_biotin	4	RVACTCPNCK	1	Q02447	Transcription factor Sp3 OS=Homo sapiens OX=9606 GN=SP3 PE=1 SV=3	600	RLRRVAcTCPNCK
ylide_biotin	8	VACTCPNCKEGGGR	1	Q02447	Transcription factor Sp3 OS=Homo sapiens OX=9606 GN=SP3 PE=1 SV=3	605	ACTCPNcKEGGGR
ylide_biotin	3	SPCGSPTGSPK	1	Q13191	E3 ubiquitin-protein ligase CBL-B OS=Homo sapiens OX=9606 GN=CBLB PE=1 SV=2	523	GIVRSPcGSPTGS
ylide_biotin	3	MACAEFSFHVPSLEELAGVMQK	1	Q9H0W9	Ester hydrolase C11orf54 OS=Homo sapiens OX=9606 GN=C11orf54 PE=1 SV=1	3	MAcAEFSFH
ylide_biotin	11	SHIMPAEFSSCPLNSDEEVNK	3	Q9H0W9	Ester hydrolase C11orf54 OS=Homo sapiens OX=9606 GN=C11orf54 PE=1 SV=1	226	PAEFSScPLNSDE
ylide_biotin	12	SLQQPGLPSQSCSVQSSGGQPPGR	2	Q53ET0	CREB-regulated transcription coactivator 2 OS=Homo sapiens OX=9606 GN=CRTC2 PE=1 SV=2	515	GLPSQScSVQSSG
ylide_biotin	12	DFQDYMEPEEGCQGSPQRR	1	O43237	Cytoplasmic dynein 1 light intermediate chain 2 OS=Homo sapiens OX=9606 GN=DYNC1LI2 PE=1 SV=1	191	MEPEEGcQGSPQR
ylide_biotin	4	KTHCSGR	7	P09234	U1 small nuclear ribonucleoprotein C OS=Homo sapiens OX=9606 GN=SNRPC PE=1 SV=1	25	SVRKTHcSGRKHK
ylide_biotin	9	MPKFYCDYCDTYLTHDSPSVR	1	P09234	U1 small nuclear ribonucleoprotein C OS=Homo sapiens OX=9606 GN=SNRPC PE=1 SV=1	9	KFYCDYcDTYLTH
ylide_biotin	11	AGSDGESIGNCPFSQR	3	Q9Y696	Chloride intracellular channel protein 4 OS=Homo sapiens OX=9606 GN=CLIC4 PE=1 SV=4	35	GESIGNcPFSQRL
ylide_biotin	3	FWCWQRPK	1	O60443	Gasdermin-E OS=Homo sapiens OX=9606 GN=GSDME PE=1 SV=2	45	KKKRFWcWQRPKY
ylide_biotin	9	KPAFTEASCPLSR	6	O15357	Phosphatidylinositol 3,4,5-trisphosphate 5-phosphatase 2 OS=Homo sapiens OX=9606 GN=INPPL1 PE=1 SV=2	926	AFTEAScPLSRLF
ylide_biotin	15	IRESIQEDLAEEAPCLQGGR	3	O15357	Phosphatidylinositol 3,4,5-trisphosphate 5-phosphatase 2 OS=Homo sapiens OX=9606 GN=INPPL1 PE=1 SV=2	1187	LAEEAPcLQGGRA
ylide_biotin	5	MASACGAPGPGGALGSQAPSWYHR	3	O15357	Phosphatidylinositol 3,4,5-trisphosphate 5-phosphatase 2 OS=Homo sapiens OX=9606 GN=INPPL1 PE=1 SV=2	5	MASAcGAPGPG
ylide_biotin	7	LAAPDPCDPQRWCHR	1	O60831	PRA1 family protein 2 OS=Homo sapiens OX=9606 GN=PRAF2 PE=1 SV=1	28	LAAPDPcDPQRWC
ylide_biotin	8	GAGNCPECGTPLRK	1	P51948	CDK-activating kinase assembly factor MAT1 OS=Homo sapiens OX=9606 GN=MNAT1 PE=1 SV=1	49	AGNCPEcGTPLRK
ylide_biotin	6	MDDQGCPRCK	7	P51948	CDK-activating kinase assembly factor MAT1 OS=Homo sapiens OX=9606 GN=MNAT1 PE=1 SV=1	6	MDDQGcPRCKTT
ylide_biotin	9	MDDQGCPRCKTTK	1	P51948	CDK-activating kinase assembly factor MAT1 OS=Homo sapiens OX=9606 GN=MNAT1 PE=1 SV=1	9	DQGCPRcKTTKYR
ylide_biotin	11	CGYPGHLTFECRNFLR	1	Q8N9Q2	Protein SREK1IP1 OS=Homo sapiens OX=9606 GN=SREK1IP1 PE=1 SV=1	28	GHLTFEcRNFLRV
ylide_biotin	6	MAVPGCNKDSVR	1	Q8N9Q2	Protein SREK1IP1 OS=Homo sapiens OX=9606 GN=SREK1IP1 PE=1 SV=1	6	MAVPGcNKDSVR
ylide_biotin	3	ATCFLPSPGEK	1	Q8IZW8	Tensin-4 OS=Homo sapiens OX=9606 GN=TNS4 PE=1 SV=3	78	VEAKATcFLPSPG
ylide_biotin	18	ELGGADGASDSTDSPASCQKK	1	Q8IZW8	Tensin-4 OS=Homo sapiens OX=9606 GN=TNS4 PE=1 SV=3	575	TDSPAScQKKSAG
ylide_biotin	21	SLESPANSSSSLHSLGSVSLCTRPSDFQAPR	1	Q8IZW8	Tensin-4 OS=Homo sapiens OX=9606 GN=TNS4 PE=1 SV=3	326	LGSVSLcTRPSDF
ylide_biotin	19	TPGHQNSVQPGAASPSNPCPATR	2	Q8IZW8	Tensin-4 OS=Homo sapiens OX=9606 GN=TNS4 PE=1 SV=3	409	ASPSNPcPATRSN
ylide_biotin	4	AFMCRFEALEK	1	P21266	Glutathione S-transferase Mu 3 OS=Homo sapiens OX=9606 GN=GSTM3 PE=1 SV=3	190	NLKAFMcRFEALE
ylide_biotin	2	LCYSSDHEK	1	P21266	Glutathione S-transferase Mu 3 OS=Homo sapiens OX=9606 GN=GSTM3 PE=1 SV=3	119	TQLIRLcYSSDHE
ylide_biotin	10	MAQWGNKPVC	6	P21266	Glutathione S-transferase Mu 3 OS=Homo sapiens OX=9606 GN=GSTM3 PE=1 SV=3	225	WGNKPVc
ylide_biotin	3	MSCESSMVLGYWDIR	2	P21266	Glutathione S-transferase Mu 3 OS=Homo sapiens OX=9606 GN=GSTM3 PE=1 SV=3	3	MScESSMVL
ylide_biotin	4	SSGCFPNMAAK	3	Q96I24	Far upstream element-binding protein 3 OS=Homo sapiens OX=9606 GN=FUBP3 PE=1 SV=2	460	PPRSSGcFPNMAA
ylide_biotin	10	AENGLLMTPCYTANFVAPEVLKR	6	P51812	Ribosomal protein S6 kinase alpha-3 OS=Homo sapiens OX=9606 GN=RPS6KA3 PE=1 SV=1	579	GLLMTPcYTANFV
ylide_biotin	5	TSGLCVPLTWR	1	Q9NPF0	CD320 antigen OS=Homo sapiens OX=9606 GN=CD320 PE=1 SV=1	67	CRTSGLcVPLTWR
ylide_biotin	6	EALSPCPSTVSTK	2	Q08AD1	Calmodulin-regulated spectrin-associated protein 2 OS=Homo sapiens OX=9606 GN=CAMSAP2 PE=1 SV=3	675	REALSPcPSTVST
ylide_biotin	6	SLYTYCPETEEINKLTGIGPK	1	Q08AD1	Calmodulin-regulated spectrin-associated protein 2 OS=Homo sapiens OX=9606 GN=CAMSAP2 PE=1 SV=3	1416	RSLYTYcPETEEI
ylide_biotin	6	SFGGGCHVTAAVSSR	2	Q9NRA8	Eukaryotic translation initiation factor 4E transporter OS=Homo sapiens OX=9606 GN=EIF4ENIF1 PE=1 SV=2	125	RSFGGGcHVTAAV
ylide_biotin	3	SSCSTPLSQANR	1	Q9NRA8	Eukaryotic translation initiation factor 4E transporter OS=Homo sapiens OX=9606 GN=EIF4ENIF1 PE=1 SV=2	767	ALQRSScSTPLSQ
ylide_biotin	11	GSSGPQPAKPCSGATPTPLLLVGDR	1	Q8N3F8	MICAL-like protein 1 OS=Homo sapiens OX=9606 GN=MICALL1 PE=1 SV=2	597	PQPAKPcSGATPT
ylide_biotin	10	KSPSSDSWTCADTSTER	9	Q8N6T3	ADP-ribosylation factor GTPase-activating protein 1 OS=Homo sapiens OX=9606 GN=ARFGAP1 PE=1 SV=2	351	SSDSWTcADTSTE
ylide_biotin	3	SGCKVDLGGFAGLFDLK	1	P22102	Trifunctional purine biosynthetic protein adenosine-3 OS=Homo sapiens OX=9606 GN=GART PE=1 SV=1	466	ATSRSGcKVDLGG
ylide_biotin	19	IINEPTAAAIAYGLDKKGCAGGEK	1	P54652	Heat shock-related 70 kDa protein 2 OS=Homo sapiens OX=9606 GN=HSPA2 PE=1 SV=1	191	GLDKKGcAGGEKN
ylide_biotin	3	THCPYAVALPEVAPAQPLTEALR	2	Q6PJG6	BRCA1-associated ATM activator 1 OS=Homo sapiens OX=9606 GN=BRAT1 PE=1 SV=2	673	GPPRTHcPYAVAL
ylide_biotin	8	WLWPWSNCVKER	1	Q2TAZ0	Autophagy-related protein 2 homolog A OS=Homo sapiens OX=9606 GN=ATG2A PE=1 SV=3	11	LWPWSNcVKERVC
ylide_biotin	4	KIGCGNFGELR	1	Q9Y6M4	Casein kinase I isoform gamma-3 OS=Homo sapiens OX=9606 GN=CSNK1G3 PE=1 SV=2	51	VGKKIGcGNFGEL
ylide_biotin	4	SQPCLTSFNSVDIASSK	1	Q93073	Selenocysteine insertion sequence-binding protein 2-like OS=Homo sapiens OX=9606 GN=SECISBP2L PE=1 SV=3	544	LTKSQPcLTSFNS
ylide_biotin	4	SSNCSSLNKEHSDSNYTTQTT	1	Q93073	Selenocysteine insertion sequence-binding protein 2-like OS=Homo sapiens OX=9606 GN=SECISBP2L PE=1 SV=3	1084	QQKSSNcSSLNKE
ylide_biotin	6	SGGGSCGGGGSYSASSSSSAAAAAGAAVLPVK	2	Q15022	Polycomb protein SUZ12 OS=Homo sapiens OX=9606 GN=SUZ12 PE=1 SV=3	46	KSGGGScGGGGSY
ylide_biotin	4	MSDCYTELEK	8	Q96FQ6	Protein S100-A16 OS=Homo sapiens OX=9606 GN=S100A16 PE=1 SV=1	4	MSDcYTELEK
ylide_biotin	5	WVGRCGR	1	Q8NFI3	Cytosolic endo-beta-N-acetylglucosaminidase OS=Homo sapiens OX=9606 GN=ENGASE PE=1 SV=1	556	ARWVGRcGRQLSG
ylide_biotin	10	DPFSQALSRCQLQQAAALNAQHK	1	Q96DF8	Splicing factor ESS-2 homolog OS=Homo sapiens OX=9606 GN=ESS2 PE=1 SV=1	263	SQALSRcQLQQAA
ylide_biotin	5	HAPHCLSEEEGEQDRPR	1	O75190	DnaJ homolog subfamily B member 6 OS=Homo sapiens OX=9606 GN=DNAJB6 PE=1 SV=2	275	LRHAPHcLSEEEG
ylide_biotin	5	KAPGCVLSNPDQK	3	P08651	Nuclear factor 1 C-type OS=Homo sapiens OX=9606 GN=NFIC PE=1 SV=2	104	GKKAPGcVLSNPD
ylide_biotin	7	MYSSPLCLTQDEFHPFIEALLPHVR	2	P08651	Nuclear factor 1 C-type OS=Homo sapiens OX=9606 GN=NFIC PE=1 SV=2	7	MYSSPLcLTQDEF
ylide_biotin	3	MSCSGSGADPEAAPASAASAPGPAPPVSAPAALPSSTAAENK	3	Q12962	Transcription initiation factor TFIID subunit 10 OS=Homo sapiens OX=9606 GN=TAF10 PE=1 SV=1	3	MScSGSGAD
ylide_biotin	12	GSAITGPVAKECADLWPR	20	P62829	60S ribosomal protein L23 OS=Homo sapiens OX=9606 GN=RPL23 PE=1 SV=1	125	GPVAKEcADLWPR
ylide_biotin	13	ISLGLPVGAVINCADNTGAK	8	P62829	60S ribosomal protein L23 OS=Homo sapiens OX=9606 GN=RPL23 PE=1 SV=1	28	VGAVINcADNTGA
ylide_biotin	11	IGLYPANYVECVGA	2	Q9UKS6	Protein kinase C and casein kinase substrate in neurons protein 3 OS=Homo sapiens OX=9606 GN=PACSIN3 PE=1 SV=2	421	PANYVEcVGA
ylide_biotin	6	AVASGCQR	1	Q9BXI9	Complement C1q tumor necrosis factor-related protein 6 OS=Homo sapiens OX=9606 GN=C1QTNF6 PE=1 SV=4	56	RAVASGcQRCCDS
ylide_biotin	6	LTISYCR	2	Q14197	Peptidyl-tRNA hydrolase ICT1, mitochondrial OS=Homo sapiens OX=9606 GN=MRPL58 PE=1 SV=1	82	RLTISYcRSSGPG
ylide_biotin	10	AVVVDITEHCH	1	O15431	High affinity copper uptake protein 1 OS=Homo sapiens OX=9606 GN=SLC31A1 PE=1 SV=1	189	VDITEHcH
ylide_biotin	4	GHQCSLKSVAFSK	1	Q9NZJ0	Denticleless protein homolog OS=Homo sapiens OX=9606 GN=DTL PE=1 SV=3	141	TCKGHQcSLKSVA
ylide_biotin	3	KICTYFHR	2	Q9NZJ0	Denticleless protein homolog OS=Homo sapiens OX=9606 GN=DTL PE=1 SV=3	710	SSMRKIcTYFHRK
ylide_biotin	7	SSQAEACSESR	3	Q9NZJ0	Denticleless protein homolog OS=Homo sapiens OX=9606 GN=DTL PE=1 SV=3	544	SSQAEAcSESRNR
ylide_biotin	10	ILQPMLDSSCSETPKTK	1	P55347	Homeobox protein PKNOX1 OS=Homo sapiens OX=9606 GN=PKNOX1 PE=1 SV=3	326	PMLDSScSETPKT
ylide_biotin	7	SASKTGCDVQER	1	Q9BVQ7	Spermatogenesis-associated protein 5-like protein 1 OS=Homo sapiens OX=9606 GN=SPATA5L1 PE=1 SV=2	580	SASKTGcDVQERV
ylide_biotin	4	TGTCGYCGLQFR	1	O75380	NADH dehydrogenase [ubiquinone] iron-sulfur protein 6, mitochondrial OS=Homo sapiens OX=9606 GN=NDUFS6 PE=1 SV=1	112	ETKTGTcGYCGLQ
ylide_biotin	4	VIACDGGGGALGHPK	2	O75380	NADH dehydrogenase [ubiquinone] iron-sulfur protein 6, mitochondrial OS=Homo sapiens OX=9606 GN=NDUFS6 PE=1 SV=1	87	ETRVIAcDGGGGA
ylide_biotin	6	NLETFCEETRR	2	Q9P2J5	Leucine--tRNA ligase, cytoplasmic OS=Homo sapiens OX=9606 GN=LARS1 PE=1 SV=2	554	KNLETFcEETRRN
ylide_biotin	9	YIELFLNSCPKGK	1	Q12849	G-rich sequence factor 1 OS=Homo sapiens OX=9606 GN=GRSF1 PE=1 SV=3	476	ELFLNScPKGK
ylide_biotin	10	ESSELLQHPCTPSGERPFR	1	Q9P2F9	Zinc finger protein 319 OS=Homo sapiens OX=9606 GN=ZNF319 PE=1 SV=2	307	ELLQHPcTPSGER
ylide_biotin	11	KPTDGASSSNCVTDISHLVR	5	P49321	Nuclear autoantigenic sperm protein OS=Homo sapiens OX=9606 GN=NASP PE=1 SV=2	708	GASSSNcVTDISH
ylide_biotin	11	SVSGTDVQEECR	5	P49321	Nuclear autoantigenic sperm protein OS=Homo sapiens OX=9606 GN=NASP PE=1 SV=2	254	TDVQEEcREKGGQ
ylide_biotin	6	IEDEECVRLDK	4	Q6P1J9	Parafibromin OS=Homo sapiens OX=9606 GN=CDC73 PE=1 SV=1	145	RIEDEEcVRLDKE
ylide_biotin	8	MEIPGSLCKKVK	11	O43252	Bifunctional 3'-phosphoadenosine 5'-phosphosulfate synthase 1 OS=Homo sapiens OX=9606 GN=PAPSS1 PE=1 SV=2	8	EIPGSLcKKVKLS
ylide_biotin	4	NLVCSALLTGSNHR	1	Q68DQ2	Very large A-kinase anchor protein OS=Homo sapiens OX=9606 GN=CRYBG3 PE=1 SV=3	380	TNRNLVcSALLTG
ylide_biotin	13	SVGDGLSTSAVGCASAAPR	3	Q03468	DNA excision repair protein ERCC-6 OS=Homo sapiens OX=9606 GN=ERCC6 PE=1 SV=1	61	STSAVGcASAAPR
ylide_biotin	8	MEEEGLECPNSSSEKR	1	Q7L7V1	Putative pre-mRNA-splicing factor ATP-dependent RNA helicase DHX32 OS=Homo sapiens OX=9606 GN=DHX32 PE=1 SV=1	8	EEEGLEcPNSSSE
ylide_biotin	5	MAASCVLLHTGQK	1	P14550	Aldo-keto reductase family 1 member A1 OS=Homo sapiens OX=9606 GN=AKR1A1 PE=1 SV=3	5	MAAScVLLHTG
ylide_biotin	6	RTDPECTAPIKK	2	Q8N1G2	Cap-specific mRNA (nucleoside-2'-O-)-methyltransferase 1 OS=Homo sapiens OX=9606 GN=CMTR1 PE=1 SV=1	9	RRTDPEcTAPIKK
ylide_biotin	6	MVKQPCPSESDIITEEDK	5	O75475	PC4 and SFRS1-interacting protein OS=Homo sapiens OX=9606 GN=PSIP1 PE=1 SV=1	204	KMVKQPcPSESDI
ylide_biotin	7	AAPRIECSHIR	6	Q9Y3C1	Nucleolar protein 16 OS=Homo sapiens OX=9606 GN=NOP16 PE=1 SV=2	36	AAPRIEcSHIRHA
ylide_biotin	11	KVEQNSRPVSCSGRDALLDQIR	4	O00401	Neural Wiskott-Aldrich syndrome protein OS=Homo sapiens OX=9606 GN=WASL PE=1 SV=2	431	NSRPVScSGRDAL
ylide_biotin	8	EASLVVTCRTNK	1	Q8IXZ2	Zinc finger CCCH domain-containing protein 3 OS=Homo sapiens OX=9606 GN=ZC3H3 PE=1 SV=3	301	ASLVVTcRTNKFR
ylide_biotin	3	GICSNSNCPYSHVYVSR	1	Q8IXZ2	Zinc finger CCCH domain-containing protein 3 OS=Homo sapiens OX=9606 GN=ZC3H3 PE=1 SV=3	737	YFLKGIcSNSNCP
ylide_biotin	20	TFVPAMTAIHGPPITAPVVCTR	1	Q96RN5	Mediator of RNA polymerase II transcription subunit 15 OS=Homo sapiens OX=9606 GN=MED15 PE=1 SV=2	660	ITAPVVcTRKRRL
ylide_biotin	7	LVGERYCKTTDVLTIK	3	P82673	28S ribosomal protein S35, mitochondrial OS=Homo sapiens OX=9606 GN=MRPS35 PE=1 SV=1	199	LVGERYcKTTDVL
ylide_biotin	11	LLGPTVMLGGCEFSR	4	Q8N9T8	Protein KRI1 homolog OS=Homo sapiens OX=9606 GN=KRI1 PE=1 SV=3	667	TVMLGGcEFSRQR
ylide_biotin	9	MAAAAGGPCVR	1	Q5SRE5	Nucleoporin NUP188 OS=Homo sapiens OX=9606 GN=NUP188 PE=1 SV=1	9	AAAGGPcVRSSRE
ylide_biotin	24	LSCLFAGPHSTLTPPCSPPEDGLCPH	1	Q9Y5X2	Sorting nexin-8 OS=Homo sapiens OX=9606 GN=SNX8 PE=1 SV=1	463	PPEDGLcPH
ylide_biotin	7	NTAAMVCSLENRDECLMCGS	2	P23921	Ribonucleoside-diphosphate reductase large subunit OS=Homo sapiens OX=9606 GN=RRM1 PE=1 SV=1	779	NTAAMVcSLENRD
ylide_biotin	11	DVVIQDDDVECTMVEKR	1	P05771	Protein kinase C beta type OS=Homo sapiens OX=9606 GN=PRKCB PE=1 SV=4	386	QDDDVEcTMVEKR
ylide_biotin	3	QACLTFR	1	Q96SZ5	2-aminoethanethiol dioxygenase OS=Homo sapiens OX=9606 GN=ADO PE=1 SV=2	18	RIARQAcLTFRGS
ylide_biotin	8	IALNLEGCALSQGSLR	4	Q9NZT2	Opioid growth factor receptor OS=Homo sapiens OX=9606 GN=OGFR PE=1 SV=3	417	ALNLEGcALSQGS
ylide_biotin	13	QSALDYFMFAVRCRHQR	3	Q9NZT2	Opioid growth factor receptor OS=Homo sapiens OX=9606 GN=OGFR PE=1 SV=3	263	FMFAVRcRHQRRQ
ylide_biotin	2	TCGPEHSK	4	Q9NZT2	Opioid growth factor receptor OS=Homo sapiens OX=9606 GN=OGFR PE=1 SV=3	330	STQGRTcGPEHSK
ylide_biotin	18	TGTQEVGGQDPGEAVQPCRQPLGAR	6	Q9NZT2	Opioid growth factor receptor OS=Homo sapiens OX=9606 GN=OGFR PE=1 SV=3	443	GEAVQPcRQPLGA
ylide_biotin	2	SCSGVEFSTSGSSNTDTGK	7	P45880	Voltage-dependent anion-selective channel protein 2 OS=Homo sapiens OX=9606 GN=VDAC2 PE=1 SV=2	47	DVKTKScSGVEFS
ylide_biotin	19	VCEDLDTSVNLAWTSGTNCTRFGIAAK	5	P45880	Voltage-dependent anion-selective channel protein 2 OS=Homo sapiens OX=9606 GN=VDAC2 PE=1 SV=2	227	WTSGTNcTRFGIA
ylide_biotin	4	YKWCEYGLTFTEK	4	P45880	Voltage-dependent anion-selective channel protein 2 OS=Homo sapiens OX=9606 GN=VDAC2 PE=1 SV=2	76	ETKYKWcEYGLTF
ylide_biotin	4	ISICSSDKR	2	Q13547	Histone deacetylase 1 OS=Homo sapiens OX=9606 GN=HDAC1 PE=1 SV=1	408	DKRISIcSSDKRI
ylide_biotin	14	APAPAPPPSGSTSCGDRDSR	2	Q9H7N4	Splicing factor, arginine/serine-rich 19 OS=Homo sapiens OX=9606 GN=SCAF1 PE=1 SV=3	675	PSGSTScGDRDSR
ylide_biotin	6	SKADSCSQAAGTK	2	Q9H7N4	Splicing factor, arginine/serine-rich 19 OS=Homo sapiens OX=9606 GN=SCAF1 PE=1 SV=3	950	KSKADScSQAAGT
ylide_biotin	11	VFVVGTEAEACREGK	1	Q9H7N4	Splicing factor, arginine/serine-rich 19 OS=Homo sapiens OX=9606 GN=SCAF1 PE=1 SV=3	362	GTEAEAcREGKVS
ylide_biotin	3	KTCFWR	1	Q8N5C7	tRNA-uridine aminocarboxypropyltransferase 1 OS=Homo sapiens OX=9606 GN=DTWD1 PE=1 SV=1	235	LKTRKTcFWRHQK
ylide_biotin	4	NAKCSGDKETGK	2	Q8N5C7	tRNA-uridine aminocarboxypropyltransferase 1 OS=Homo sapiens OX=9606 GN=DTWD1 PE=1 SV=1	293	LIKNAKcSGDKET
ylide_biotin	7	TEEQEFCDLNDSK	1	Q8N5C7	tRNA-uridine aminocarboxypropyltransferase 1 OS=Homo sapiens OX=9606 GN=DTWD1 PE=1 SV=1	187	TEEQEFcDLNDSK
ylide_biotin	5	FRYGCEGPSHGGLPGASSEK	1	Q00653	Nuclear factor NF-kappa-B p100 subunit OS=Homo sapiens OX=9606 GN=NFKB2 PE=1 SV=4	57	FRFRYGcEGPSHG
ylide_biotin	12	LGPPPEPPGGLCHGHPQPQVH	1	Q00653	Nuclear factor NF-kappa-B p100 subunit OS=Homo sapiens OX=9606 GN=NFKB2 PE=1 SV=4	891	EPPGGLcHGHPQP
ylide_biotin	9	IVLVDDRECPVRR	3	O15067	Phosphoribosylformylglycinamidine synthase OS=Homo sapiens OX=9606 GN=PFAS PE=1 SV=4	606	LVDDREcPVRRNG
ylide_biotin	8	NWTLEGSC	1	O15067	Phosphoribosylformylglycinamidine synthase OS=Homo sapiens OX=9606 GN=PFAS PE=1 SV=4	1338	WTLEGSc
ylide_biotin	5	KSSMCSAPSSSSSAK	1	Q765P7	Protein MTSS 2 OS=Homo sapiens OX=9606 GN=MTSS2 PE=1 SV=1	276	SRKSSMcSAPSSS
ylide_biotin	16	KLGPGRPLPTFPTSECTSDVEPDTR	2	Q8TDD1	ATP-dependent RNA helicase DDX54 OS=Homo sapiens OX=9606 GN=DDX54 PE=1 SV=2	73	TFPTSEcTSDVEP
ylide_biotin	6	GLHDSCPGQAR	1	Q32NC0	UPF0711 protein C18orf21 OS=Homo sapiens OX=9606 GN=C18orf21 PE=1 SV=1	18	RGLHDScPGQARY
ylide_biotin	11	TPTSGQSVSTCSSK	3	Q32NC0	UPF0711 protein C18orf21 OS=Homo sapiens OX=9606 GN=C18orf21 PE=1 SV=1	175	GQSVSTcSSKNTS
ylide_biotin	7	MASVGECPAPVPVKDK	5	P56134	ATP synthase subunit f, mitochondrial OS=Homo sapiens OX=9606 GN=ATP5MF PE=1 SV=3	7	MASVGEcPAPVPV
ylide_biotin	9	LGTSESLPCTAEELSR	1	Q9BZL6	Serine/threonine-protein kinase D2 OS=Homo sapiens OX=9606 GN=PRKD2 PE=1 SV=3	217	TSESLPcTAEELS
ylide_biotin	11	MPGHLQEGFGCVVTNR	4	Q8NC51	Plasminogen activator inhibitor 1 RNA-binding protein OS=Homo sapiens OX=9606 GN=SERBP1 PE=1 SV=2	11	LQEGFGcVVTNRF
ylide_biotin	4	QTFCFMNRR	2	Q8N556	Actin filament-associated protein 1 OS=Homo sapiens OX=9606 GN=AFAP1 PE=1 SV=2	471	TAKQTFcFMNRRV
ylide_biotin	10	SQAAPGSSPCRGHVLR	1	Q8N556	Actin filament-associated protein 1 OS=Homo sapiens OX=9606 GN=AFAP1 PE=1 SV=2	713	APGSSPcRGHVLR
ylide_biotin	8	ELELMFGCQVEGDAAETPPRPR	1	Q02750	Dual specificity mitogen-activated protein kinase kinase 1 OS=Homo sapiens OX=9606 GN=MAP2K1 PE=1 SV=2	277	LELMFGcQVEGDA
ylide_biotin	5	SLTGCWSAGTISK	3	Q6KB66	Keratin, type II cytoskeletal 80 OS=Homo sapiens OX=9606 GN=KRT80 PE=1 SV=2	49	SRSLTGcWSAGTI
ylide_biotin	12	LLHVFACACPGCSTGGAR	3	Q9BRP1	Programmed cell death protein 2-like OS=Homo sapiens OX=9606 GN=PDCD2L PE=1 SV=1	85	ACACPGcSTGGAR
ylide_biotin	14	GVLFGVPGAFTPGCSK	11	P30044	Peroxiredoxin-5, mitochondrial OS=Homo sapiens OX=9606 GN=PRDX5 PE=1 SV=4	100	GAFTPGcSKTHLP
ylide_biotin	4	SVSCSDEDEKPR	1	Q7Z589	BRCA2-interacting transcriptional repressor EMSY OS=Homo sapiens OX=9606 GN=EMSY PE=1 SV=2	194	YVKSVScSDEDEK
ylide_biotin	4	FTKCLR	2	P11474	Steroid hormone receptor ERR1 OS=Homo sapiens OX=9606 GN=ESRRA PE=1 SV=3	139	ACRFTKcLRVGML
ylide_biotin	16	TIQGSIEYSCPASNECEITK	2	P11474	Steroid hormone receptor ERR1 OS=Homo sapiens OX=9606 GN=ESRRA PE=1 SV=3	121	CPASNEcEITKRR
ylide_biotin	12	VYAVATSTNTPCARIPR	2	Q10570	Cleavage and polyadenylation specificity factor subunit 1 OS=Homo sapiens OX=9606 GN=CPSF1 PE=1 SV=2	1044	TSTNTPcARIPRM
ylide_biotin	4	LAACAAK	1	Q5JSZ5	Protein PRRC2B OS=Homo sapiens OX=9606 GN=PRRC2B PE=1 SV=2	525	EERLAAcAAKLKQ
ylide_biotin	4	LSNCGYGR	1	Q5JSZ5	Protein PRRC2B OS=Homo sapiens OX=9606 GN=PRRC2B PE=1 SV=2	1212	PPRLSNcGYGRRT
ylide_biotin	4	SIYCSSQR	2	Q5JSZ5	Protein PRRC2B OS=Homo sapiens OX=9606 GN=PRRC2B PE=1 SV=2	1101	GARSIYcSSQRSG
ylide_biotin	5	SNKGCSEDHSGLDAK	1	Q5JSZ5	Protein PRRC2B OS=Homo sapiens OX=9606 GN=PRRC2B PE=1 SV=2	1184	WRSNKGcSEDHSG
ylide_biotin	4	GTPCERPVR	3	P49585	Choline-phosphate cytidylyltransferase A OS=Homo sapiens OX=9606 GN=PCYT1A PE=1 SV=2	73	ASRGTPcERPVRV
ylide_biotin	4	VQRCAVGLR	1	P49585	Choline-phosphate cytidylyltransferase A OS=Homo sapiens OX=9606 GN=PCYT1A PE=1 SV=2	37	PSKVQRcAVGLRQ
ylide_biotin	6	ITVAECIETQSK	1	Q9ULU4	Protein kinase C-binding protein 1 OS=Homo sapiens OX=9606 GN=ZMYND8 PE=1 SV=2	138	KITVAEcIETQSK
ylide_biotin	2	SCTQSATAPQQEADAEVNTETLNK	1	Q9ULU4	Protein kinase C-binding protein 1 OS=Homo sapiens OX=9606 GN=ZMYND8 PE=1 SV=2	1062	PEHMKScTQSATA
ylide_biotin	13	LHMTIFSQSVSPCGK	1	Q86W42	THO complex subunit 6 homolog OS=Homo sapiens OX=9606 GN=THOC6 PE=1 SV=1	35	SQSVSPcGKFLAA
ylide_biotin	7	LVSSPCCIVTSTYGWTANMER	4	P08238	Heat shock protein HSP 90-beta OS=Homo sapiens OX=9606 GN=HSP90AB1 PE=1 SV=4	590	LVSSPCcIVTSTY
ylide_biotin	25	AGLGEGVPPGNYGNYGYANSGYSACEEENERLTESLR	1	O15155	BET1 homolog OS=Homo sapiens OX=9606 GN=BET1 PE=1 SV=1	28	NSGYSAcEEENER
ylide_biotin	24	ELDVEEAHAASTEEKEAGVGNGTCAPVRLPFSGFR	2	Q96C86	m7GpppX diphosphatase OS=Homo sapiens OX=9606 GN=DCPS PE=1 SV=2	37	GVGNGTcAPVRLP
ylide_biotin	13	IFHPNVGANGEICVNVLKR	5	Q16763	Ubiquitin-conjugating enzyme E2 S OS=Homo sapiens OX=9606 GN=UBE2S PE=1 SV=2	95	GANGEIcVNVLKR
ylide_biotin	11	TPDTPNNDPRCSTSNNR	2	Q16513	Serine/threonine-protein kinase N2 OS=Homo sapiens OX=9606 GN=PKN2 PE=1 SV=1	131	PNNDPRcSTSNNR
ylide_biotin	10	APDWVDAEECHRCR	2	O14964	Hepatocyte growth factor-regulated tyrosine kinase substrate OS=Homo sapiens OX=9606 GN=HGS PE=1 SV=1	166	WVDAEEcHRCRVQ
ylide_biotin	5	VCEPCYEQLNR	1	O14964	Hepatocyte growth factor-regulated tyrosine kinase substrate OS=Homo sapiens OX=9606 GN=HGS PE=1 SV=1	215	VRVCEPcYEQLNR
ylide_biotin	4	CAKCLHPLANETFVAK	1	Q13642	Four and a half LIM domains protein 1 OS=Homo sapiens OX=9606 GN=FHL1 PE=1 SV=4	71	CFRCAKcLHPLAN
ylide_biotin	6	CFDKFCANTCVECR	2	Q13642	Four and a half LIM domains protein 1 OS=Homo sapiens OX=9606 GN=FHL1 PE=1 SV=4	36	KCFDKFcANTCVE
ylide_biotin	6	DNKILCNKCTTR	1	Q13642	Four and a half LIM domains protein 1 OS=Homo sapiens OX=9606 GN=FHL1 PE=1 SV=4	89	KDNKILcNKCTTR
ylide_biotin	9	FWHDTCFRCAK	6	Q13642	Four and a half LIM domains protein 1 OS=Homo sapiens OX=9606 GN=FHL1 PE=1 SV=4	68	HDTCFRcAKCLHP
ylide_biotin	9	GEDFYCVTCHETK	3	Q13642	Four and a half LIM domains protein 1 OS=Homo sapiens OX=9606 GN=FHL1 PE=1 SV=4	153	DFYCVTcHETKFA
ylide_biotin	6	ILCNKCTTR	12	Q13642	Four and a half LIM domains protein 1 OS=Homo sapiens OX=9606 GN=FHL1 PE=1 SV=4	92	KILCNKcTTREDS
ylide_biotin	14	VEHSPGPPPVDKQCQEGLSENSAYR	1	Q9H869	YY1-associated protein 1 OS=Homo sapiens OX=9606 GN=YY1AP1 PE=1 SV=2	734	PPVDKQcQEGLSE
ylide_biotin	8	VGQNLPRCGIECK	2	Q9Y312	Protein AAR2 homolog OS=Homo sapiens OX=9606 GN=AAR2 PE=1 SV=2	181	GQNLPRcGIECKS
ylide_biotin	6	LPDYICPR	2	Q9BV68	E3 ubiquitin-protein ligase RNF126 OS=Homo sapiens OX=9606 GN=RNF126 PE=1 SV=2	29	RLPDYIcPRCESG
ylide_biotin	5	YFCHCCSVEIVPR	2	Q9BV68	E3 ubiquitin-protein ligase RNF126 OS=Homo sapiens OX=9606 GN=RNF126 PE=1 SV=2	15	GRYFCHcCSVEIV
ylide_biotin	7	LTGEGSCPHSGDVHIQINSIPK	1	Q5M7Z0	E3 ubiquitin-protein ligase RNFT1 OS=Homo sapiens OX=9606 GN=RNFT1 PE=1 SV=2	73	LTGEGScPHSGDV
ylide_biotin	7	TSLPKSCDL	2	O15287	Fanconi anemia group G protein OS=Homo sapiens OX=9606 GN=FANCG PE=1 SV=1	620	TSLPKScDL
ylide_biotin	14	QELSHALYQHDAACRVIAR	1	Q9UMS4	Pre-mRNA-processing factor 19 OS=Homo sapiens OX=9606 GN=PRPF19 PE=1 SV=1	114	YQHDAAcRVIARL
ylide_biotin	8	ELDLSNNCLGDAGILQLVESVR	1	P13489	Ribonuclease inhibitor OS=Homo sapiens OX=9606 GN=RNH1 PE=1 SV=2	409	LDLSNNcLGDAGI
ylide_biotin	11	SNELGDVGVHCVLQGLQTPSCK	1	P13489	Ribonuclease inhibitor OS=Homo sapiens OX=9606 GN=RNH1 PE=1 SV=2	75	GDVGVHcVLQGLQ
ylide_biotin	9	GSDELFSTCVTNGPFIMSSNSASAANGNDSKK	1	P26599	Polypyrimidine tract-binding protein 1 OS=Homo sapiens OX=9606 GN=PTBP1 PE=1 SV=1	23	DELFSTcVTNGPF
ylide_biotin	9	FQMQVLPQCGHAVHEDAPDKVAEAVATFLIR	1	Q9Y570	Protein phosphatase methylesterase 1 OS=Homo sapiens OX=9606 GN=PPME1 PE=1 SV=3	347	MQVLPQcGHAVHE
ylide_biotin	12	HRFAEPIGGFQCVFPGC	1	Q9Y570	Protein phosphatase methylesterase 1 OS=Homo sapiens OX=9606 GN=PPME1 PE=1 SV=3	381	PIGGFQcVFPGC
ylide_biotin	10	VSMVGQVKQCEGITSPEGSK	1	Q9Y570	Protein phosphatase methylesterase 1 OS=Homo sapiens OX=9606 GN=PPME1 PE=1 SV=3	238	VGQVKQcEGITSP
ylide_biotin	3	VVCDENGSK	1	Q13310	Polyadenylate-binding protein 4 OS=Homo sapiens OX=9606 GN=PABPC4 PE=1 SV=1	132	LSCKVVcDENGSK
ylide_biotin	12	YIPVEDLQDPRCHVR	1	O15047	Histone-lysine N-methyltransferase SETD1A OS=Homo sapiens OX=9606 GN=SETD1A PE=1 SV=3	65	DLQDPRcHVRSKN
ylide_biotin	8	SVSHPGSCSSER	2	Q9HB20	Pleckstrin homology domain-containing family A member 3 OS=Homo sapiens OX=9606 GN=PLEKHA3 PE=1 SV=2	216	VSHPGScSSERSS
ylide_biotin	7	FSGSCRCCAK	1	Q8WVD3	E3 ubiquitin-protein ligase RNF138 OS=Homo sapiens OX=9606 GN=RNF138 PE=1 SV=1	88	FSGSCRcCAKQIK
ylide_biotin	5	LKAACNLLQR	1	Q01813	ATP-dependent 6-phosphofructokinase, platelet type OS=Homo sapiens OX=9606 GN=PFKP PE=1 SV=2	112	GRLKAAcNLLQRG
ylide_biotin	5	HLTHCQSR	9	Q96JM3	Chromosome alignment-maintaining phosphoprotein 1 OS=Homo sapiens OX=9606 GN=CHAMP1 PE=1 SV=2	787	KKHLTHcQSRHNE
ylide_biotin	12	SPPLPEHQKIPCNSAEPK	2	Q96JM3	Chromosome alignment-maintaining phosphoprotein 1 OS=Homo sapiens OX=9606 GN=CHAMP1 PE=1 SV=2	119	EHQKIPcNSAEPK
ylide_biotin	5	SVPVCESQK	1	Q96JM3	Chromosome alignment-maintaining phosphoprotein 1 OS=Homo sapiens OX=9606 GN=CHAMP1 PE=1 SV=2	194	PKSVPVcESQKLA
ylide_biotin	12	TVEEIEACMAGCDKAFTPFSGPK	3	P12955	Xaa-Pro dipeptidase OS=Homo sapiens OX=9606 GN=PEPD PE=1 SV=3	482	EACMAGcDKAFTP
ylide_biotin	8	MSESPTPCSGSSFEETEALVNTAAK	1	O95359	Transforming acidic coiled-coil-containing protein 2 OS=Homo sapiens OX=9606 GN=TACC2 PE=1 SV=3	2573	SESPTPcSGSSFE
ylide_biotin	5	TFTPCERLEK	1	Q9HD67	Unconventional myosin-X OS=Homo sapiens OX=9606 GN=MYO10 PE=1 SV=3	1874	TKTFTPcERLEKR
ylide_biotin	5	ESYICKVNR	3	Q9Y4E5	E3 SUMO-protein ligase ZNF451 OS=Homo sapiens OX=9606 GN=ZNF451 PE=1 SV=2	730	CRESYIcKVNRKE
ylide_biotin	6	TGTINCGTK	1	Q9Y4E5	E3 SUMO-protein ligase ZNF451 OS=Homo sapiens OX=9606 GN=ZNF451 PE=1 SV=2	150	KTGTINcGTKSSF
ylide_biotin	6	LAEYKCNTNTAIELK	2	O14929	Histone acetyltransferase type B catalytic subunit OS=Homo sapiens OX=9606 GN=HAT1 PE=1 SV=1	27	KLAEYKcNTNTAI
ylide_biotin	13	VEYASKVDENFDCVEADDVEGK	1	O14929	Histone acetyltransferase type B catalytic subunit OS=Homo sapiens OX=9606 GN=HAT1 PE=1 SV=1	101	VDENFDcVEADDV
ylide_biotin	6	SGNKECPTCR	2	Q06587	E3 ubiquitin-protein ligase RING1 OS=Homo sapiens OX=9606 GN=RING1 PE=1 SV=2	84	RSGNKEcPTCRKK
ylide_biotin	6	DLRISCMSKPPAPNPTPPR	2	P46734	Dual specificity mitogen-activated protein kinase kinase 3 OS=Homo sapiens OX=9606 GN=MAP2K3 PE=1 SV=2	29	KDLRIScMSKPPA
ylide_biotin	6	TMDAGCKPYMAPER	3	P46734	Dual specificity mitogen-activated protein kinase kinase 3 OS=Homo sapiens OX=9606 GN=MAP2K3 PE=1 SV=2	227	KTMDAGcKPYMAP
ylide_biotin	17	EPNLEPMVEKQESENSCNKEEEPVFTR	3	Q9Y520	Protein PRRC2C OS=Homo sapiens OX=9606 GN=PRRC2C PE=1 SV=4	620	QESENScNKEEEP
ylide_biotin	3	GPCGSLSGVR	1	Q9Y520	Protein PRRC2C OS=Homo sapiens OX=9606 GN=PRRC2C PE=1 SV=4	2788	HVARGPcGSLSGV
ylide_biotin	4	KAACAEK	2	Q9Y520	Protein PRRC2C OS=Homo sapiens OX=9606 GN=PRRC2C PE=1 SV=4	481	EQRKAAcAEKLKR
ylide_biotin	3	IACGPPQAK	11	Q9Y520	Protein PRRC2C OS=Homo sapiens OX=9606 GN=PRRC2C PE=1 SV=4	223	VEKRIAcGPPQAK
ylide_biotin	18	SVEDVRPHHTDANNQSACFEAPDQK	2	Q9Y520	Protein PRRC2C OS=Homo sapiens OX=9606 GN=PRRC2C PE=1 SV=4	895	ANNQSAcFEAPDQ
ylide_biotin	7	ALSETACEDSEENKQR	1	Q7L1W4	Volume-regulated anion channel subunit LRRC8D OS=Homo sapiens OX=9606 GN=LRRC8D PE=1 SV=1	218	ALSETAcEDSEEN
ylide_biotin	6	LAFRPCGNANPHK	1	O00189	AP-4 complex subunit mu-1 OS=Homo sapiens OX=9606 GN=AP4M1 PE=1 SV=2	431	RLAFRPcGNANPH
ylide_biotin	16	LYLDELEGGGNPGASCKDTSGEIK	2	Q9HD26	Golgi-associated PDZ and coiled-coil motif-containing protein OS=Homo sapiens OX=9606 GN=GOPC PE=1 SV=1	408	GNPGAScKDTSGE
ylide_biotin	14	SKEDGEVVQEEEVCAKPSVTEEK	3	Q9NQS1	Cell death regulator Aven OS=Homo sapiens OX=9606 GN=AVEN PE=1 SV=1	326	VQEEEVcAKPSVT
ylide_biotin	6	SVAAGCPVLLGK	5	Q9NQS1	Cell death regulator Aven OS=Homo sapiens OX=9606 GN=AVEN PE=1 SV=1	251	KSVAAGcPVLLGK
ylide_biotin	4	GRGCNESFR	4	Q8TEW8	Partitioning defective 3 homolog B OS=Homo sapiens OX=9606 GN=PARD3B PE=1 SV=2	777	MVRGRGcNESFRA
ylide_biotin	9	ECFHPYNTCITDLR	3	Q8TBE9	N-acylneuraminate-9-phosphatase OS=Homo sapiens OX=9606 GN=NANP PE=1 SV=1	67	FHPYNTcITDLRT
ylide_biotin	6	WAPDHCSEVER	1	Q9NWQ4	G patch domain-containing protein 2-like OS=Homo sapiens OX=9606 GN=GPATCH2L PE=1 SV=3	274	KWAPDHcSEVERM
ylide_biotin	5	MKGTCVEGTIPK	2	Q93009	Ubiquitin carboxyl-terminal hydrolase 7 OS=Homo sapiens OX=9606 GN=USP7 PE=1 SV=2	315	NKMKGTcVEGTIP
ylide_biotin	4	AVTCKSTAELEAEELEK	2	Q9ULW0	Targeting protein for Xklp2 OS=Homo sapiens OX=9606 GN=TPX2 PE=1 SV=2	383	RARAVTcKSTAEL
ylide_biotin	4	EAACFKARPNTVISQEPFVPK	1	Q9ULW0	Targeting protein for Xklp2 OS=Homo sapiens OX=9606 GN=TPX2 PE=1 SV=2	624	QQKEAAcFKARPN
ylide_biotin	9	NVTQIEPFCLETDRR	3	Q9ULW0	Targeting protein for Xklp2 OS=Homo sapiens OX=9606 GN=TPX2 PE=1 SV=2	594	TQIEPFcLETDRR
ylide_biotin	7	SSVTKICRDPQTPVLQTK	2	Q9ULW0	Targeting protein for Xklp2 OS=Homo sapiens OX=9606 GN=TPX2 PE=1 SV=2	364	SSVTKIcRDPQTP
ylide_biotin	5	TVEICPFSFDSR	8	Q9ULW0	Targeting protein for Xklp2 OS=Homo sapiens OX=9606 GN=TPX2 PE=1 SV=2	536	ARTVEIcPFSFDS
ylide_biotin	5	VTKGCTIVKPFNLSQGK	5	Q9ULW0	Targeting protein for Xklp2 OS=Homo sapiens OX=9606 GN=TPX2 PE=1 SV=2	301	ARVTKGcTIVKPF
ylide_biotin	5	YNLACHR	3	Q9NR09	Baculoviral IAP repeat-containing protein 6 OS=Homo sapiens OX=9606 GN=BIRC6 PE=1 SV=2	1932	CRYNLAcHRLETL
ylide_biotin	3	KICAVGITK	1	P55060	Exportin-2 OS=Homo sapiens OX=9606 GN=CSE1L PE=1 SV=3	842	NVEKKIcAVGITK
ylide_biotin	7	GLNMSMCHPGQMSLLGR	2	Q86UU0	B-cell CLL/lymphoma 9-like protein OS=Homo sapiens OX=9606 GN=BCL9L PE=1 SV=1	1392	GLNMSMcHPGQMS
ylide_biotin	19	TGNGGAQSQHQNVNQGPTCNVGSK	1	Q86UU0	B-cell CLL/lymphoma 9-like protein OS=Homo sapiens OX=9606 GN=BCL9L PE=1 SV=1	68	VNQGPTcNVGSKG
ylide_biotin	2	KCDLISIPK	1	Q9ULV4	Coronin-1C OS=Homo sapiens OX=9606 GN=CORO1C PE=1 SV=1	420	PTANKKcDLISIP
ylide_biotin	7	SIKDTICNQDER	4	Q9ULV4	Coronin-1C OS=Homo sapiens OX=9606 GN=CORO1C PE=1 SV=1	456	SIKDTIcNQDERI
ylide_biotin	8	AIHEQMNCKEYQEDLALR	1	Q9BYM8	RanBP-type and C3HC4-type zinc finger-containing protein 1 OS=Homo sapiens OX=9606 GN=RBCK1 PE=1 SV=2	411	IHEQMNcKEYQED
ylide_biotin	8	LIVVTDSCGRVESSGK	1	Q16670	Zinc finger and SCAN domain-containing protein 26 OS=Homo sapiens OX=9606 GN=ZSCAN26 PE=1 SV=2	196	IVVTDScGRVESS
ylide_biotin	2	DCQLNAHK	9	Q13263	Transcription intermediary factor 1-beta OS=Homo sapiens OX=9606 GN=TRIM28 PE=1 SV=5	232	TLTCRDcQLNAHK
ylide_biotin	3	QQCFSKDIVENYFMR	4	Q13263	Transcription intermediary factor 1-beta OS=Homo sapiens OX=9606 GN=TRIM28 PE=1 SV=5	124	PVCKQQcFSKDIV
ylide_biotin	33	STAPSAAASASASAAASSPAGGGAEALELLEHCGVCR	2	Q13263	Transcription intermediary factor 1-beta OS=Homo sapiens OX=9606 GN=TRIM28 PE=1 SV=5	65	LELLEHcGVCRER
ylide_biotin	4	TVYCNVHK	2	Q13263	Transcription intermediary factor 1-beta OS=Homo sapiens OX=9606 GN=TRIM28 PE=1 SV=5	209	GERTVYcNVHKHE
ylide_biotin	19	TVYCNVHKHEPLVLFCESCDTLTCR	3	Q13263	Transcription intermediary factor 1-beta OS=Homo sapiens OX=9606 GN=TRIM28 PE=1 SV=5	224	VLFCEScDTLTCR
ylide_biotin	2	ACVGNAYHK	4	Q9UKX7	Nuclear pore complex protein Nup50 OS=Homo sapiens OX=9606 GN=NUP50 PE=1 SV=2	151	LASSKAcVGNAYH
ylide_biotin	4	RTGCTFPEKPDFH	3	P55263	Adenosine kinase OS=Homo sapiens OX=9606 GN=ADK PE=1 SV=2	353	IIRRTGcTFPEKP
ylide_biotin	11	SLIANLAAANCYKK	1	P55263	Adenosine kinase OS=Homo sapiens OX=9606 GN=ADK PE=1 SV=2	160	NLAAANcYKKEKH
ylide_biotin	8	LASSVLRCGK	20	P84098	60S ribosomal protein L19 OS=Homo sapiens OX=9606 GN=RPL19 PE=1 SV=1	17	ASSVLRcGKKKVW
ylide_biotin	3	VACETVAK	2	P31153	S-adenosylmethionine synthase isoform type-2 OS=Homo sapiens OX=9606 GN=MAT2A PE=1 SV=1	56	PDAKVAcETVAKT
ylide_biotin	15	VHTIVISVQHDEEVCLDEMRDALK	14	P31153	S-adenosylmethionine synthase isoform type-2 OS=Homo sapiens OX=9606 GN=MAT2A PE=1 SV=1	214	QHDEEVcLDEMRD
ylide_biotin	5	ISASCQHPTAFEEAIPK	4	Q9ULA0	Aspartyl aminopeptidase OS=Homo sapiens OX=9606 GN=DNPEP PE=1 SV=2	337	RRISAScQHPTAF
ylide_biotin	5	VIVKCPTSGR	3	Q9ULA0	Aspartyl aminopeptidase OS=Homo sapiens OX=9606 GN=DNPEP PE=1 SV=2	154	GRVIVKcPTSGRL
ylide_biotin	7	KDNLIPCKEAGLK	2	Q00013	55 kDa erythrocyte membrane protein OS=Homo sapiens OX=9606 GN=MPP1 PE=1 SV=2	179	KDNLIPcKEAGLK
ylide_biotin	15	VASMAQSAPSEAPSCSPFGKK	1	Q00013	55 kDa erythrocyte membrane protein OS=Homo sapiens OX=9606 GN=MPP1 PE=1 SV=2	242	PSEAPScSPFGKK
ylide_biotin	5	SGVVCR	3	Q8N7H5	RNA polymerase II-associated factor 1 homolog OS=Homo sapiens OX=9606 GN=PAF1 PE=1 SV=2	31	ERSGVVcRVKYCN
ylide_biotin	9	TLEAFHDTCRQ	1	Q6P2C8	Mediator of RNA polymerase II transcription subunit 27 OS=Homo sapiens OX=9606 GN=MED27 PE=1 SV=1	309	EAFHDTcRQ
ylide_biotin	5	LRSDCESQECVTK	1	Q9NS86	LanC-like protein 2 OS=Homo sapiens OX=9606 GN=LANCL2 PE=1 SV=1	169	HKLRSDcESQECV
ylide_biotin	4	SVVCQESDLPDELLYGR	4	Q9NS86	LanC-like protein 2 OS=Homo sapiens OX=9606 GN=LANCL2 PE=1 SV=1	187	LQRSVVcQESDLP
ylide_biotin	3	VTCDQTYLLR	1	Q9NS86	LanC-like protein 2 OS=Homo sapiens OX=9606 GN=LANCL2 PE=1 SV=1	121	QLYRVTcDQTYLL
ylide_biotin	4	SKFCEADVSSDLRK	1	Q9NWY4	Histone PARylation factor 1 OS=Homo sapiens OX=9606 GN=HPF1 PE=1 SV=2	29	VKKSKFcEADVSS
ylide_biotin	8	AEISFVLCKDHVR	4	Q8N9N8	Probable RNA-binding protein EIF1AD OS=Homo sapiens OX=9606 GN=EIF1AD PE=1 SV=1	89	EISFVLcKDHVRS
ylide_biotin	12	VFTSNPTPAVLCFRVK	1	Q0JRZ9	F-BAR domain only protein 2 OS=Homo sapiens OX=9606 GN=FCHO2 PE=1 SV=2	595	PTPAVLcFRVKNI
ylide_biotin	6	GQEKTCRETEVGDPAGNELAEPEAK	2	Q96G46	tRNA-dihydrouridine(47) synthase [NAD(P)(+)]-like OS=Homo sapiens OX=9606 GN=DUS3L PE=1 SV=2	54	KGQEKTcRETEVG
ylide_biotin	6	DTSRNCSASTSQGR	4	Q66PJ3	ADP-ribosylation factor-like protein 6-interacting protein 4 OS=Homo sapiens OX=9606 GN=ARL6IP4 PE=1 SV=2	220	KDTSRNcSASTSQ
ylide_biotin	7	QATRGDCLAFQMR	4	Q66PJ3	ADP-ribosylation factor-like protein 6-interacting protein 4 OS=Homo sapiens OX=9606 GN=ARL6IP4 PE=1 SV=2	410	QATRGDcLAFQMR
ylide_biotin	4	ACFCDDHTR	1	Q9Y3S2	Zinc finger protein 330 OS=Homo sapiens OX=9606 GN=ZNF330 PE=1 SV=1	194	RCKACFcDDHTRS
ylide_biotin	23	IFSCSFCHNFLCEDDQFEHQASCQVLEAETFK	1	Q9Y3S2	Zinc finger protein 330 OS=Homo sapiens OX=9606 GN=ZNF330 PE=1 SV=1	165	FEHQAScQVLEAE
ylide_biotin	6	LGQHSCLR	1	Q9Y3S2	Zinc finger protein 330 OS=Homo sapiens OX=9606 GN=ZNF330 PE=1 SV=1	186	RLGQHScLRCKAC
ylide_biotin	24	SFVEVNEEGTEAAAATAAIMMMRCAR	1	P35237	Serpin B6 OS=Homo sapiens OX=9606 GN=SERPINB6 PE=1 SV=3	342	AIMMMRcARFVPR
ylide_biotin	9	ALHGPLPLCLLK	1	Q96GV9	Macrophage immunometabolism regulator OS=Homo sapiens OX=9606 GN=MACIR PE=1 SV=1	156	HGPLPLcLLKGKR
ylide_biotin	2	MCSAGELLR	2	Q8N8J7	Uncharacterized protein FAM241A OS=Homo sapiens OX=9606 GN=FAM241A PE=2 SV=2	2	McSAGELL
ylide_biotin	4	QGQCTKGDK	3	Q8WU90	Zinc finger CCCH domain-containing protein 15 OS=Homo sapiens OX=9606 GN=ZC3H15 PE=1 SV=1	113	FFKQGQcTKGDKC
ylide_biotin	6	MLALSCKLER	1	O75717	WD repeat and HMG-box DNA-binding protein 1 OS=Homo sapiens OX=9606 GN=WDHD1 PE=1 SV=1	773	KMLALScKLEREF
ylide_biotin	5	SKENCISGPVK	1	O14965	Aurora kinase A OS=Homo sapiens OX=9606 GN=AURKA PE=1 SV=2	8	DRSKENcISGPVK
ylide_biotin	3	VLCPSNSSQR	2	O14965	Aurora kinase A OS=Homo sapiens OX=9606 GN=AURKA PE=1 SV=2	49	QAQRVLcPSNSSQ
ylide_biotin	9	VLVTQQFPCQNPLPVNSGQAQR	2	O14965	Aurora kinase A OS=Homo sapiens OX=9606 GN=AURKA PE=1 SV=2	33	VTQQFPcQNPLPV
ylide_biotin	13	DVQIGDIVTVGECRPLSK	4	P62280	40S ribosomal protein S11 OS=Homo sapiens OX=9606 GN=RPS11 PE=1 SV=3	131	IVTVGEcRPLSKT
ylide_biotin	12	EAIEGTYIDKKCPFTGNVSIR	6	P62280	40S ribosomal protein S11 OS=Homo sapiens OX=9606 GN=RPS11 PE=1 SV=3	60	TYIDKKcPFTGNV
ylide_biotin	9	NMSVHLSPCFRDVQIGDIVTVGECRPLSK	3	P62280	40S ribosomal protein S11 OS=Homo sapiens OX=9606 GN=RPS11 PE=1 SV=3	116	SVHLSPcFRDVQI
ylide_biotin	23	EVPGSEAARPEQEPPVAEPVPVCTIFSQR	1	Q8WVT3	Trafficking protein particle complex subunit 12 OS=Homo sapiens OX=9606 GN=TRAPPC12 PE=1 SV=3	160	AEPVPVcTIFSQR
ylide_biotin	13	IYHCNINSQGVICLDILKDNWSPALTISK	1	Q96LR5	Ubiquitin-conjugating enzyme E2 E2 OS=Homo sapiens OX=9606 GN=UBE2E2 PE=1 SV=1	139	NSQGVIcLDILKD
ylide_biotin	10	ATFNPAQDKCGIR	7	O00592	Podocalyxin OS=Homo sapiens OX=9606 GN=PODXL PE=1 SV=2	395	NPAQDKcGIRLAS
ylide_biotin	6	LISLICRAVK	1	O00592	Podocalyxin OS=Homo sapiens OX=9606 GN=PODXL PE=1 SV=2	381	KLISLIcRAVKAT
ylide_biotin	3	VACAEEWQESR	1	O75663	TIP41-like protein OS=Homo sapiens OX=9606 GN=TIPRL PE=1 SV=2	87	GMLKVAcAEEWQE
ylide_biotin	6	NRESACQSR	1	P18850	Cyclic AMP-dependent transcription factor ATF-6 alpha OS=Homo sapiens OX=9606 GN=ATF6 PE=1 SV=3	321	KNRESAcQSRKKK
ylide_biotin	4	LKLCQPSLDLPEWWECGR	1	Q9P2D1	Chromodomain-helicase-DNA-binding protein 7 OS=Homo sapiens OX=9606 GN=CHD7 PE=1 SV=3	2081	GERLKLcQPSLDL
ylide_biotin	24	EGGGDSSASSPTEEEQEQGEIGACSDEGTAQEGK	1	P49006	MARCKS-related protein OS=Homo sapiens OX=9606 GN=MARCKSL1 PE=1 SV=2	134	QGEIGAcSDEGTA
ylide_biotin	4	SSKCPVEAK	4	Q8TF64	PDZ domain-containing protein GIPC3 OS=Homo sapiens OX=9606 GN=GIPC3 PE=1 SV=1	209	RSRSSKcPVEAKV
ylide_biotin	4	NQGCCGVR	1	Q96GN5	Cell division cycle-associated 7-like protein OS=Homo sapiens OX=9606 GN=CDCA7L PE=1 SV=2	372	VCRNQGcCGVRGQ
ylide_biotin	13	MAEASSANLGSGCEEKRHEGSSSESVPPGTTISR	1	Q6P1K2	Polyamine-modulated factor 1 OS=Homo sapiens OX=9606 GN=PMF1 PE=1 SV=2	13	ANLGSGcEEKRHE
ylide_biotin	5	DASRCSEQPSISDIKEK	1	Q14527	Helicase-like transcription factor OS=Homo sapiens OX=9606 GN=HLTF PE=1 SV=2	360	SKDASRcSEQPSI
ylide_biotin	3	GACAVEGSK	5	Q14527	Helicase-like transcription factor OS=Homo sapiens OX=9606 GN=HLTF PE=1 SV=2	461	MLKKGAcAVEGSK
ylide_biotin	11	NDIHEDNLLECPPEELAR	3	Q14527	Helicase-like transcription factor OS=Homo sapiens OX=9606 GN=HLTF PE=1 SV=2	812	EDNLLEcPPEELA
ylide_biotin	5	AVLFCLSEDKK	1	P23528	Cofilin-1 OS=Homo sapiens OX=9606 GN=CFL1 PE=1 SV=3	39	KKAVLFcLSEDKK
ylide_biotin	7	HELQANCYEEVK	61	P23528	Cofilin-1 OS=Homo sapiens OX=9606 GN=CFL1 PE=1 SV=3	139	HELQANcYEEVKD
ylide_biotin	15	HELQANCYEEVKDRCTLAEK	21	P23528	Cofilin-1 OS=Homo sapiens OX=9606 GN=CFL1 PE=1 SV=3	147	EEVKDRcTLAEKL
ylide_biotin	6	EVQTVCAGLTR	1	Q5VWQ0	Lysine-specific demethylase 9 OS=Homo sapiens OX=9606 GN=RSBN1 PE=1 SV=2	282	KEVQTVcAGLTRI
ylide_biotin	8	YLKDEQLCR	1	Q5VWQ0	Lysine-specific demethylase 9 OS=Homo sapiens OX=9606 GN=RSBN1 PE=1 SV=2	318	LKDEQLcRLNLGM
ylide_biotin	4	SSLCLKGER	1	Q4LE39	AT-rich interactive domain-containing protein 4B OS=Homo sapiens OX=9606 GN=ARID4B PE=1 SV=2	107	LRRSSLcLKGERH
ylide_biotin	9	AETAANRICK	1	P12814	Alpha-actinin-1 OS=Homo sapiens OX=9606 GN=ACTN1 PE=1 SV=2	263	TAANRIcKVLAVN
ylide_biotin	4	ARQCEKENLGWQK	1	P15924	Desmoplakin OS=Homo sapiens OX=9606 GN=DSP PE=1 SV=3	1148	LQKARQcEKENLG
ylide_biotin	7	DANSENCNKNK	2	P15924	Desmoplakin OS=Homo sapiens OX=9606 GN=DSP PE=1 SV=3	1052	DANSENcNKNKFL
ylide_biotin	6	GSEKYCYLQNEVFGLFQK	1	P15924	Desmoplakin OS=Homo sapiens OX=9606 GN=DSP PE=1 SV=3	740	RGSEKYcYLQNEV
ylide_biotin	12	GVITDQNSDGYCQTGTMSR	2	P15924	Desmoplakin OS=Homo sapiens OX=9606 GN=DSP PE=1 SV=3	57	QNSDGYcQTGTMS
ylide_biotin	8	IQESKNQCTQVVQER	1	P15924	Desmoplakin OS=Homo sapiens OX=9606 GN=DSP PE=1 SV=3	1805	QESKNQcTQVVQE
ylide_biotin	3	MSCNGGSHPR	2	P15924	Desmoplakin OS=Homo sapiens OX=9606 GN=DSP PE=1 SV=3	3	MScNGGSHP
ylide_biotin	9	TTHYTPLACGSNPLKR	2	O60832	H/ACA ribonucleoprotein complex subunit DKC1 OS=Homo sapiens OX=9606 GN=DKC1 PE=1 SV=3	74	HYTPLAcGSNPLK
ylide_biotin	7	CLPTPKCHTPPLYR	8	Q02543	60S ribosomal protein L18a OS=Homo sapiens OX=9606 GN=RPL18A PE=1 SV=2	22	CLPTPKcHTPPLY
ylide_biotin	8	EYKVVGRCLPTPK	4	Q02543	60S ribosomal protein L18a OS=Homo sapiens OX=9606 GN=RPL18A PE=1 SV=2	16	YKVVGRcLPTPKC
ylide_biotin	9	VEEIAASKCR	16	Q02543	60S ribosomal protein L18a OS=Homo sapiens OX=9606 GN=RPL18A PE=1 SV=2	137	EIAASKcRRPAVK
ylide_biotin	3	TVCDAAEK	5	O60664	Perilipin-3 OS=Homo sapiens OX=9606 GN=PLIN3 PE=1 SV=3	60	PHIKTVcDAAEKG
ylide_biotin	10	EIVHIQAGQCGNQIGTK	2	Q9BUF5	Tubulin beta-6 chain OS=Homo sapiens OX=9606 GN=TUBB6 PE=1 SV=1	12	HIQAGQcGNQIGT
ylide_biotin	6	NMMAACDPR	12	Q9BUF5	Tubulin beta-6 chain OS=Homo sapiens OX=9606 GN=TUBB6 PE=1 SV=1	303	RNMMAAcDPRHGR
ylide_biotin	4	DSPCKENK	1	A3KN83	Protein strawberry notch homolog 1 OS=Homo sapiens OX=9606 GN=SBNO1 PE=1 SV=1	699	SPRDSPcKENKIK
ylide_biotin	7	ARLTEGCSFR	9	P42677	40S ribosomal protein S27 OS=Homo sapiens OX=9606 GN=RPS27 PE=1 SV=3	77	ARLTEGcSFRRKQ
ylide_biotin	4	LNSCETKSSTSSSQK	1	Q5T5Y3	Calmodulin-regulated spectrin-associated protein 1 OS=Homo sapiens OX=9606 GN=CAMSAP1 PE=1 SV=2	828	LQRLNScETKSST
ylide_biotin	4	GQPCSQNYR	2	Q9H2U2	Inorganic pyrophosphatase 2, mitochondrial OS=Homo sapiens OX=9606 GN=PPA2 PE=1 SV=2	44	EERGQPcSQNYRL
ylide_biotin	7	YYTPVPCESATAK	10	P51692	Signal transducer and activator of transcription 5B OS=Homo sapiens OX=9606 GN=STAT5B PE=1 SV=2	688	YYTPVPcESATAK
ylide_biotin	11	MLEAPGPSDGCELSNPSASR	4	Q9UNI6	Dual specificity protein phosphatase 12 OS=Homo sapiens OX=9606 GN=DUSP12 PE=1 SV=1	11	PGPSDGcELSNPS
ylide_biotin	10	ASFVDEHTVCGVAK	2	Q9NNW7	Thioredoxin reductase 2, mitochondrial OS=Homo sapiens OX=9606 GN=TXNRD2 PE=1 SV=3	168	VDEHTVcGVAKGG
ylide_biotin	7	WGLGGTCVNVGCIPK	2	Q9NNW7	Thioredoxin reductase 2, mitochondrial OS=Homo sapiens OX=9606 GN=TXNRD2 PE=1 SV=3	86	WGLGGTcVNVGCI
ylide_biotin	3	ALCHLNVPVTVVLDAAVGYIMEK	1	Q14232	Translation initiation factor eIF-2B subunit alpha OS=Homo sapiens OX=9606 GN=EIF2B1 PE=1 SV=1	169	KMAKALcHLNVPV
ylide_biotin	2	KCGETAFIAPQCEMIPIEWVCR	6	P22234	Multifunctional protein ADE2 OS=Homo sapiens OX=9606 GN=PAICS PE=1 SV=3	81	TAFTRKcGETAFI
ylide_biotin	3	DSCPVRIR	3	O60783	28S ribosomal protein S14, mitochondrial OS=Homo sapiens OX=9606 GN=MRPS14 PE=1 SV=1	83	ALPRDScPVRIRN
ylide_biotin	5	QTNGCLNGYTPSR	2	Q9BZX2	Uridine-cytidine kinase 2 OS=Homo sapiens OX=9606 GN=UCK2 PE=1 SV=1	241	KRQTNGcLNGYTP
ylide_biotin	12	AANTATEEKLVCSGENDNHGQIANLPSAVTSDQK	1	Q8WYP5	Protein ELYS OS=Homo sapiens OX=9606 GN=AHCTF1 PE=1 SV=3	1628	TEEKLVcSGENDN
ylide_biotin	6	GRPSLCAHPPVPR	1	Q96H86	Zinc finger protein 764 OS=Homo sapiens OX=9606 GN=ZNF764 PE=1 SV=2	163	RGRPSLcAHPPVP
ylide_biotin	5	LGPGCGMMAGGK	5	Q96EB1	Elongator complex protein 4 OS=Homo sapiens OX=9606 GN=ELP4 PE=1 SV=2	412	KRLGPGcGMMAGG
ylide_biotin	10	ISSTLKVEPCSLTPGYTK	4	Q96EB1	Elongator complex protein 4 OS=Homo sapiens OX=9606 GN=ELP4 PE=1 SV=2	218	TLKVEPcSLTPGY
ylide_biotin	7	MAAVATCGSVAASTGSAVATASK	1	Q96EB1	Elongator complex protein 4 OS=Homo sapiens OX=9606 GN=ELP4 PE=1 SV=2	7	MAAVATcGSVAAS
ylide_biotin	4	ALLCKPITQTK	1	Q5VZL5	Zinc finger MYM-type protein 4 OS=Homo sapiens OX=9606 GN=ZMYM4 PE=1 SV=1	948	KNKALLcKPITQT
ylide_biotin	3	VSCSGCKK	1	Q5VZL5	Zinc finger MYM-type protein 4 OS=Homo sapiens OX=9606 GN=ZMYM4 PE=1 SV=1	341	TAVRVScSGCKKI
ylide_biotin	14	SSVELPPYSGTVLCGTQAVDKLPDGQEYQR	5	Q14694	Ubiquitin carboxyl-terminal hydrolase 10 OS=Homo sapiens OX=9606 GN=USP10 PE=1 SV=2	40	YSGTVLcGTQAVD
ylide_biotin	4	TGGCQKLIK	2	Q14694	Ubiquitin carboxyl-terminal hydrolase 10 OS=Homo sapiens OX=9606 GN=USP10 PE=1 SV=2	697	YEKTGGcQKLIKN
ylide_biotin	21	TPSYSISSTLNPQAPEFILGCTASK	1	Q14694	Ubiquitin carboxyl-terminal hydrolase 10 OS=Homo sapiens OX=9606 GN=USP10 PE=1 SV=2	94	PEFILGcTASKIT
ylide_biotin	5	VQRPCTSTPMIDSFVR	1	Q14694	Ubiquitin carboxyl-terminal hydrolase 10 OS=Homo sapiens OX=9606 GN=USP10 PE=1 SV=2	456	SKVQRPcTSTPMI
ylide_biotin	4	KVDCPGPGSGAEGSGPGSVVPGSSGVGTPR	2	O00268	Transcription initiation factor TFIID subunit 4 OS=Homo sapiens OX=9606 GN=TAF4 PE=1 SV=2	1022	KKRKVDcPGPGSG
ylide_biotin	12	SAVETQANNLICR	2	O75362	Zinc finger protein 217 OS=Homo sapiens OX=9606 GN=ZNF217 PE=1 SV=1	641	QANNLIcRTKADV
ylide_biotin	8	SAVLQPGCPSVGIPHSGYVNAQLEK	4	Q9P253	Vacuolar protein sorting-associated protein 18 homolog OS=Homo sapiens OX=9606 GN=VPS18 PE=1 SV=2	22	AVLQPGcPSVGIP
ylide_biotin	4	YSYCKR	1	P37275	Zinc finger E-box-binding homeobox 1 OS=Homo sapiens OX=9606 GN=ZEB1 PE=1 SV=2	986	NHRYSYcKREAEE
ylide_biotin	6	LKCPYCPMEQSPGDAK	3	Q9H871	E3 ubiquitin-protein transferase RMND5A OS=Homo sapiens OX=9606 GN=RMND5A PE=1 SV=1	377	KLKCPYcPMEQSP
ylide_biotin	12	DAHWSEDSEADCHAL	1	Q9BW91	ADP-ribose pyrophosphatase, mitochondrial OS=Homo sapiens OX=9606 GN=NUDT9 PE=1 SV=1	347	EDSEADcHAL
ylide_biotin	4	GASCPDFR	3	Q17RN3	Protein FAM98C OS=Homo sapiens OX=9606 GN=FAM98C PE=1 SV=1	36	ASRGAScPDFRGL
ylide_biotin	4	RGTCCAINK	1	Q17RN3	Protein FAM98C OS=Homo sapiens OX=9606 GN=FAM98C PE=1 SV=1	301	AVRRGTcCAINKV
ylide_biotin	13	ADSVVVLLCRQPCASQSSLK	1	Q92900	Regulator of nonsense transcripts 1 OS=Homo sapiens OX=9606 GN=UPF1 PE=1 SV=2	213	LLCRQPcASQSSL
ylide_biotin	4	TNACASK	1	Q5EE01	Centromere protein W OS=Homo sapiens OX=9606 GN=CENPW PE=1 SV=1	63	ESRTNAcASKCRV
ylide_biotin	7	MTGESECLNPSTQSR	1	Q9H2G2	STE20-like serine/threonine-protein kinase OS=Homo sapiens OX=9606 GN=SLK PE=1 SV=1	1212	MTGESEcLNPSTQ
ylide_biotin	13	DLKPSNLLLNTTCDLKICDFGLAR	1	P28482	Mitogen-activated protein kinase 1 OS=Homo sapiens OX=9606 GN=MAPK1 PE=1 SV=3	161	LLLNTTcDLKICD
ylide_biotin	16	TCSMVGNGDTTSQDDCVSKER	1	Q6NYC1	Bifunctional arginine demethylase and lysyl-hydroxylase JMJD6 OS=Homo sapiens OX=9606 GN=JMJD6 PE=1 SV=1	394	TTSQDDcVSKERS
ylide_biotin	18	SGNEEKMMALLTPLNVNCHASDGR	1	Q9H2K2	Poly [ADP-ribose] polymerase tankyrase-2 OS=Homo sapiens OX=9606 GN=TNKS2 PE=1 SV=1	204	TPLNVNcHASDGR
ylide_biotin	8	SRRPDGQCTVTEV	1	Q9NTX7	E3 ubiquitin-protein ligase RNF146 OS=Homo sapiens OX=9606 GN=RNF146 PE=1 SV=1	354	RRPDGQcTVTEV
ylide_biotin	11	LTGPAAAEPRCAADAGMKR	2	Q8N2K0	Lysophosphatidylserine lipase ABHD12 OS=Homo sapiens OX=9606 GN=ABHD12 PE=1 SV=2	52	AAAEPRcAADAGM
ylide_biotin	10	GYESFGVHRCADGGLYCK	1	Q04446	1,4-alpha-glucan-branching enzyme OS=Homo sapiens OX=9606 GN=GBE1 PE=1 SV=3	81	SFGVHRcADGGLY
ylide_biotin	4	HFTCNVLPR	1	Q04446	1,4-alpha-glucan-branching enzyme OS=Homo sapiens OX=9606 GN=GBE1 PE=1 SV=3	221	SYKHFTcNVLPRI
ylide_biotin	9	TMSSDDEDCSAKGR	2	Q9NVR2	Integrator complex subunit 10 OS=Homo sapiens OX=9606 GN=INTS10 PE=1 SV=2	387	SSDDEDcSAKGRN
ylide_biotin	9	AVDALLTHCKSR	1	O76021	Ribosomal L1 domain-containing protein 1 OS=Homo sapiens OX=9606 GN=RSL1D1 PE=1 SV=3	47	DALLTHcKSRKNN
ylide_biotin	4	SGSCSAIR	1	O76021	Ribosomal L1 domain-containing protein 1 OS=Homo sapiens OX=9606 GN=RSL1D1 PE=1 SV=3	211	ISKSGScSAIRIG
ylide_biotin	3	GSCFHR	8	Q9Y536	Peptidyl-prolyl cis-trans isomerase A-like 4A OS=Homo sapiens OX=9606 GN=PPIAL4A PE=2 SV=1	52	FRYKGScFHRIIP
ylide_biotin	11	APQGCSGVDECARQEGLTFFGTELAPVR	1	Q96AQ6	Pre-B-cell leukemia transcription factor-interacting protein 1 OS=Homo sapiens OX=9606 GN=PBXIP1 PE=1 SV=1	594	CSGVDEcARQEGL
ylide_biotin	7	YRAPQGCSGVDECAR	2	Q96AQ6	Pre-B-cell leukemia transcription factor-interacting protein 1 OS=Homo sapiens OX=9606 GN=PBXIP1 PE=1 SV=1	588	YRAPQGcSGVDEC
ylide_biotin	5	AACFCHR	2	Q13889	General transcription factor IIH subunit 3 OS=Homo sapiens OX=9606 GN=GTF2H3 PE=1 SV=2	257	YRAACFcHRNLIE
ylide_biotin	2	SCGHQTSASSLK	2	Q9HB90	Ras-related GTP-binding protein C OS=Homo sapiens OX=9606 GN=RRAGC PE=1 SV=1	377	VTSHRScGHQTSA
ylide_biotin	7	LGTDESCFNMILATR	2	P20073	Annexin A7 OS=Homo sapiens OX=9606 GN=ANXA7 PE=1 SV=3	363	LGTDEScFNMILA
ylide_biotin	10	APNTAELKICRVNR	1	Q04206	Transcription factor p65 OS=Homo sapiens OX=9606 GN=RELA PE=1 SV=2	197	TAELKIcRVNRNS
ylide_biotin	5	FRYKCEGR	5	Q04206	Transcription factor p65 OS=Homo sapiens OX=9606 GN=RELA PE=1 SV=2	38	MRFRYKcEGRSAG
ylide_biotin	4	TDSCSSAQAQYDTPK	1	Q96PD2	Discoidin, CUB and LCCL domain-containing protein 2 OS=Homo sapiens OX=9606 GN=DCBLD2 PE=1 SV=1	725	LSRTDScSSAQAQ
ylide_biotin	16	HCDSINSDFGSESGGCGDSSPGPSASQGPR	3	Q8TD19	Serine/threonine-protein kinase Nek9 OS=Homo sapiens OX=9606 GN=NEK9 PE=1 SV=2	25	GSESGGcGDSSPG
ylide_biotin	6	LLTFGCNKCGQLGVGNYK	1	Q8TD19	Serine/threonine-protein kinase Nek9 OS=Homo sapiens OX=9606 GN=NEK9 PE=1 SV=2	623	RLLTFGcNKCGQL
ylide_biotin	7	LNPAVTCAGK	5	Q8TD19	Serine/threonine-protein kinase Nek9 OS=Homo sapiens OX=9606 GN=NEK9 PE=1 SV=2	878	LNPAVTcAGKGTP
ylide_biotin	3	QVCAGNTHFAVVTVEK	1	Q8TD19	Serine/threonine-protein kinase Nek9 OS=Homo sapiens OX=9606 GN=NEK9 PE=1 SV=2	375	CSARQVcAGNTHF
ylide_biotin	3	SGCSAR	2	Q8TD19	Serine/threonine-protein kinase Nek9 OS=Homo sapiens OX=9606 GN=NEK9 PE=1 SV=2	369	DVIKSGcSARQVC
ylide_biotin	11	TFDATNPLNLCVKIVQGIR	1	Q8TD19	Serine/threonine-protein kinase Nek9 OS=Homo sapiens OX=9606 GN=NEK9 PE=1 SV=2	260	TNPLNLcVKIVQG
ylide_biotin	6	NFQTTCGMSLPR	1	Q5T5U3	Rho GTPase-activating protein 21 OS=Homo sapiens OX=9606 GN=ARHGAP21 PE=1 SV=2	603	RNFQTTcGMSLPR
ylide_biotin	6	SNTAVCVCNESVR	1	Q5T5U3	Rho GTPase-activating protein 21 OS=Homo sapiens OX=9606 GN=ARHGAP21 PE=1 SV=2	265	KSNTAVcVCNESV
ylide_biotin	7	MSAAVACVDYFAADVLMAISSGAVVHR	1	Q9BXK1	Krueppel-like factor 16 OS=Homo sapiens OX=9606 GN=KLF16 PE=1 SV=1	7	MSAAVAcVDYFAA
ylide_biotin	14	GALMANFLTQGQVCCNGTR	1	P49189	4-trimethylaminobutyraldehyde dehydrogenase OS=Homo sapiens OX=9606 GN=ALDH9A1 PE=1 SV=3	288	LTQGQVcCNGTRV
ylide_biotin	8	EKPLPVICSTSAASLK	1	Q9UQR0	Sex comb on midleg-like protein 2 OS=Homo sapiens OX=9606 GN=SCML2 PE=1 SV=1	324	KPLPVIcSTSAAS
ylide_biotin	16	AQTPPGPSLSGSKSPCPQEK	1	Q9UQ35	Serine/arginine repetitive matrix protein 2 OS=Homo sapiens OX=9606 GN=SRRM2 PE=1 SV=2	1016	SGSKSPcPQEKSK
ylide_biotin	5	GRSECDSSPEPK	2	Q9UQ35	Serine/arginine repetitive matrix protein 2 OS=Homo sapiens OX=9606 GN=SRRM2 PE=1 SV=2	1480	SRGRSEcDSSPEP
ylide_biotin	3	MSCFSRPSMSPTPLDR	2	Q9UQ35	Serine/arginine repetitive matrix protein 2 OS=Homo sapiens OX=9606 GN=SRRM2 PE=1 SV=2	2116	NSSRMScFSRPSM
ylide_biotin	2	SCFESSPDPELK	3	Q9UQ35	Serine/arginine repetitive matrix protein 2 OS=Homo sapiens OX=9606 GN=SRRM2 PE=1 SV=2	872	TPQRRScFESSPD
ylide_biotin	16	SKDSLVQSCPGSLSLCAGVK	3	Q9UQ35	Serine/arginine repetitive matrix protein 2 OS=Homo sapiens OX=9606 GN=SRRM2 PE=1 SV=2	1036	PGSLSLcAGVKSS
ylide_biotin	9	SKDSLVQSCPGSLSLCAGVK	3	Q9UQ35	Serine/arginine repetitive matrix protein 2 OS=Homo sapiens OX=9606 GN=SRRM2 PE=1 SV=2	1029	DSLVQScPGSLSL
ylide_biotin	5	SVSPCSNVESR	2	Q9UQ35	Serine/arginine repetitive matrix protein 2 OS=Homo sapiens OX=9606 GN=SRRM2 PE=1 SV=2	956	SRSVSPcSNVESR
ylide_biotin	5	DLNYCFSGMSDHR	7	P31943	Heterogeneous nuclear ribonucleoprotein H OS=Homo sapiens OX=9606 GN=HNRNPH1 PE=1 SV=4	267	GRDLNYcFSGMSD
ylide_biotin	15	YGDGGSTFQSTTGHCVHMR	2	P31943	Heterogeneous nuclear ribonucleoprotein H OS=Homo sapiens OX=9606 GN=HNRNPH1 PE=1 SV=4	290	QSTTGHcVHMRGL
ylide_biotin	5	NIQACKELAQTTR	1	P50990	T-complex protein 1 subunit theta OS=Homo sapiens OX=9606 GN=CCT8 PE=1 SV=4	36	YRNIQAcKELAQT
ylide_biotin	9	QITSYGETCPGLEQYAIKK	1	P50990	T-complex protein 1 subunit theta OS=Homo sapiens OX=9606 GN=CCT8 PE=1 SV=4	430	TSYGETcPGLEQY
ylide_biotin	12	AFQYVETHGEVCPANWTPDSPTIKPSPAASK	2	P30048	Thioredoxin-dependent peroxide reductase, mitochondrial OS=Homo sapiens OX=9606 GN=PRDX3 PE=1 SV=3	229	ETHGEVcPANWTP
ylide_biotin	10	ALETNTHVKCFSLAATR	5	Q9NYL9	Tropomodulin-3 OS=Homo sapiens OX=9606 GN=TMOD3 PE=1 SV=1	231	TNTHVKcFSLAAT
ylide_biotin	11	AGSDGAKIGNCPFSQR	1	O00299	Chloride intracellular channel protein 1 OS=Homo sapiens OX=9606 GN=CLIC1 PE=1 SV=4	24	GAKIGNcPFSQRL
ylide_biotin	6	AQKEPCLFANTEK	1	Q9NS87	Kinesin-like protein KIF15 OS=Homo sapiens OX=9606 GN=KIF15 PE=1 SV=1	576	KAQKEPcLFANTE
ylide_biotin	5	MAPGCKTELR	1	Q9NS87	Kinesin-like protein KIF15 OS=Homo sapiens OX=9606 GN=KIF15 PE=1 SV=1	5	MAPGcKTELRS
ylide_biotin	8	RVIGVELCPEAVEDAR	3	Q8IZ69	tRNA (uracil-5-)-methyltransferase homolog A OS=Homo sapiens OX=9606 GN=TRMT2A PE=1 SV=2	463	VIGVELcPEAVED
ylide_biotin	12	LYEFWWSLSRPCPNSSVWVR	1	Q8TEQ6	Gem-associated protein 5 OS=Homo sapiens OX=9606 GN=GEMIN5 PE=1 SV=3	1296	WSLSRPcPNSSVW
ylide_biotin	3	GRCDETAAAK	1	Q8NCN4	E3 ubiquitin-protein ligase RNF169 OS=Homo sapiens OX=9606 GN=RNF169 PE=1 SV=2	28	RGRRGRcDETAAA
ylide_biotin	5	LDKTCISR	1	Q8NCN4	E3 ubiquitin-protein ligase RNF169 OS=Homo sapiens OX=9606 GN=RNF169 PE=1 SV=2	563	AKLDKTcISRAMK
ylide_biotin	4	SQSCSDTAQER	2	Q8NCN4	E3 ubiquitin-protein ligase RNF169 OS=Homo sapiens OX=9606 GN=RNF169 PE=1 SV=2	293	VERSQScSDTAQE
ylide_biotin	8	EIAITNGCINR	2	Q8IV48	3'-5' exoribonuclease 1 OS=Homo sapiens OX=9606 GN=ERI1 PE=1 SV=3	75	IAITNGcINRMSK
ylide_biotin	5	LQGTCFKGLNVLK	1	Q5SWA1	Protein phosphatase 1 regulatory subunit 15B OS=Homo sapiens OX=9606 GN=PPP1R15B PE=1 SV=1	703	NRLQGTcFKGLNV
ylide_biotin	3	HGCADTR	1	Q7Z3J2	VPS35 endosomal protein-sorting factor-like OS=Homo sapiens OX=9606 GN=VPS35L PE=1 SV=2	925	LAQRHGcADTRTM
ylide_biotin	9	WYFNQDSACRESGGAPK	1	Q9BT25	HAUS augmin-like complex subunit 8 OS=Homo sapiens OX=9606 GN=HAUS8 PE=1 SV=3	354	FNQDSAcRESGGA
ylide_biotin	13	IHAVGAPSVCSSCGQSYYR	1	Q6DD87	Zinc finger protein 787 OS=Homo sapiens OX=9606 GN=ZNF787 PE=1 SV=4	350	PSVCSScGQSYYR
ylide_biotin	9	SINNDTTYCIKKLPR	1	Q53H82	Endoribonuclease LACTB2 OS=Homo sapiens OX=9606 GN=LACTB2 PE=1 SV=2	100	NNDTTYcIKKLPR
ylide_biotin	3	NQCEGIKK	1	O14980	Exportin-1 OS=Homo sapiens OX=9606 GN=XPO1 PE=1 SV=1	99	ILPRNQcEGIKKY
ylide_biotin	7	TSSDPTCVEKEK	4	O14980	Exportin-1 OS=Homo sapiens OX=9606 GN=XPO1 PE=1 SV=1	119	TSSDPTcVEKEKV
ylide_biotin	6	QPNGVCRAGFER	1	Q9NZQ3	NCK-interacting protein with SH3 domain OS=Homo sapiens OX=9606 GN=NCKIPSD PE=1 SV=1	138	RQPNGVcRAGFER
ylide_biotin	3	MACPLEKALDVMVSTFHK	1	P26447	Protein S100-A4 OS=Homo sapiens OX=9606 GN=S100A4 PE=1 SV=1	3	MAcPLEKAL
ylide_biotin	15	MPEDGLSDDKKPFKCFTPK	1	Q05682	Caldesmon OS=Homo sapiens OX=9606 GN=CALD1 PE=1 SV=3	636	DKKPFKcFTPKGS
ylide_biotin	6	KDLKACEVEAGK	1	Q9NZ56	Formin-2 OS=Homo sapiens OX=9606 GN=FMN2 PE=1 SV=4	1590	KKDLKAcEVEAGK
ylide_biotin	5	GPSGCVESLEVTCR	4	P47897	Glutamine--tRNA ligase OS=Homo sapiens OX=9606 GN=QARS1 PE=1 SV=1	657	VKGPSGcVESLEV
ylide_biotin	14	ADIDVSGPKVDVECPDVNIEGPEGK	6	Q09666	Neuroblast differentiation-associated protein AHNAK OS=Homo sapiens OX=9606 GN=AHNAK PE=1 SV=2	2806	PKVDVEcPDVNIE
ylide_biotin	15	GPFVEAEVPDVDLECPDAK	9	Q09666	Neuroblast differentiation-associated protein AHNAK OS=Homo sapiens OX=9606 GN=AHNAK PE=1 SV=2	1833	PDVDLEcPDAKLK
ylide_biotin	21	LEGDLTGPSVDVEVPDVELECPDAK	3	Q09666	Neuroblast differentiation-associated protein AHNAK OS=Homo sapiens OX=9606 GN=AHNAK PE=1 SV=2	2162	PDVELEcPDAKLK
ylide_biotin	21	LEGDLTGPSVGVEVPDVELECPDAK	1	Q09666	Neuroblast differentiation-associated protein AHNAK OS=Homo sapiens OX=9606 GN=AHNAK PE=1 SV=2	1900	PDVELEcPDAKLK
ylide_biotin	21	LEGDLTGPSVGVEVPDVELECPDAK	1	Q09666	Neuroblast differentiation-associated protein AHNAK OS=Homo sapiens OX=9606 GN=AHNAK PE=1 SV=2	1967	PDVELEcPDAKLK
ylide_biotin	4	SSGCDVNLPGVNVK	2	Q09666	Neuroblast differentiation-associated protein AHNAK OS=Homo sapiens OX=9606 GN=AHNAK PE=1 SV=2	5502	GIKSSGcDVNLPG
ylide_biotin	4	TGTCRISMSEVDLNVAAPK	5	Q09666	Neuroblast differentiation-associated protein AHNAK OS=Homo sapiens OX=9606 GN=AHNAK PE=1 SV=2	567	SGKTGTcRISMSE
ylide_biotin	3	GGCKIKEIR	8	Q15366	Poly(rC)-binding protein 2 OS=Homo sapiens OX=9606 GN=PCBP2 PE=1 SV=1	118	LIGKGGcKIKEIR
ylide_biotin	8	INISEGNCPER	8	Q15366	Poly(rC)-binding protein 2 OS=Homo sapiens OX=9606 GN=PCBP2 PE=1 SV=1	54	NISEGNcPERIIT
ylide_biotin	7	EAPVNLCKPSLGK	1	Q9ULD2	Microtubule-associated tumor suppressor 1 OS=Homo sapiens OX=9606 GN=MTUS1 PE=1 SV=2	475	EAPVNLcKPSLGK
ylide_biotin	7	TNTPIGCKVR	1	Q9ULD2	Microtubule-associated tumor suppressor 1 OS=Homo sapiens OX=9606 GN=MTUS1 PE=1 SV=2	492	TNTPIGcKVRKTE
ylide_biotin	11	IVSENPQREACSYTIHAEGDER	1	Q4G176	Malonate--CoA ligase ACSF3, mitochondrial OS=Homo sapiens OX=9606 GN=ACSF3 PE=1 SV=3	399	NPQREAcSYTIHA
ylide_biotin	8	ATAVDPTCARLR	1	Q8IY26	Phospholipid phosphatase 6 OS=Homo sapiens OX=9606 GN=PLPP6 PE=1 SV=3	55	TAVDPTcARLRAS
ylide_biotin	7	NKTHTLCR	4	P61927	60S ribosomal protein L37 OS=Homo sapiens OX=9606 GN=RPL37 PE=1 SV=2	19	NKTHTLcRRCGSK
ylide_biotin	3	STCGKCGYPAK	38	P61927	60S ribosomal protein L37 OS=Homo sapiens OX=9606 GN=RPL37 PE=1 SV=2	34	HLQKSTcGKCGYP
ylide_biotin	6	STCGKCGYPAKR	23	P61927	60S ribosomal protein L37 OS=Homo sapiens OX=9606 GN=RPL37 PE=1 SV=2	37	KSTCGKcGYPAKR
ylide_biotin	13	KTNPGPVGETLLCQLSSYAK	1	Q9H9L4	KAT8 regulatory NSL complex subunit 2 OS=Homo sapiens OX=9606 GN=KANSL2 PE=1 SV=3	117	VGETLLcQLSSYA
ylide_biotin	7	ELFQTPCTDNPTTDEK	1	P46013	Proliferation marker protein Ki-67 OS=Homo sapiens OX=9606 GN=MKI67 PE=1 SV=2	1843	ELFQTPcTDNPTT
ylide_biotin	9	EQPQLTSTCHIAISNSENLLGK	2	P46013	Proliferation marker protein Ki-67 OS=Homo sapiens OX=9606 GN=MKI67 PE=1 SV=2	773	PQLTSTcHIAISN
ylide_biotin	11	KADVEGELLACR	1	P46013	Proliferation marker protein Ki-67 OS=Homo sapiens OX=9606 GN=MKI67 PE=1 SV=2	1285	EGELLAcRNLMPS
ylide_biotin	4	KILCKSPQSDPADTPTNTK	2	P46013	Proliferation marker protein Ki-67 OS=Homo sapiens OX=9606 GN=MKI67 PE=1 SV=2	1859	TTKKILcKSPQSD
ylide_biotin	19	KPVGEVHSQFSTGHANSPCTIIIGK	1	P46013	Proliferation marker protein Ki-67 OS=Homo sapiens OX=9606 GN=MKI67 PE=1 SV=2	715	GHANSPcTIIIGK
ylide_biotin	3	IACKSPPPESVDTPTSTK	2	P46013	Proliferation marker protein Ki-67 OS=Homo sapiens OX=9606 GN=MKI67 PE=1 SV=2	1129	KTTKIAcKSPPPE
ylide_biotin	6	ITKMPCQSLQPEPINTPTHTK	2	P46013	Proliferation marker protein Ki-67 OS=Homo sapiens OX=9606 GN=MKI67 PE=1 SV=2	1007	KITKMPcQSLQPE
ylide_biotin	3	RSCKTAPASSSK	1	P46013	Proliferation marker protein Ki-67 OS=Homo sapiens OX=9606 GN=MKI67 PE=1 SV=2	599	DQRRRScKTAPAS
ylide_biotin	6	TTKIPCDSPQSDPVDTPTSTK	2	P46013	Proliferation marker protein Ki-67 OS=Homo sapiens OX=9606 GN=MKI67 PE=1 SV=2	1251	KTTKIPcDSPQSD
ylide_biotin	6	TTKMPCESSPPESADTPTSTR	1	P46013	Proliferation marker protein Ki-67 OS=Homo sapiens OX=9606 GN=MKI67 PE=1 SV=2	1373	KTTKMPcESSPPE
ylide_biotin	3	VACKSSQPDPDKNPASSK	2	P46013	Proliferation marker protein Ki-67 OS=Homo sapiens OX=9606 GN=MKI67 PE=1 SV=2	1615	KTAKVAcKSSQPD
ylide_biotin	17	IHETQETTDKSADDAGCQLQELR	1	Q14149	MORC family CW-type zinc finger protein 3 OS=Homo sapiens OX=9606 GN=MORC3 PE=1 SV=3	694	SADDAGcQLQELR
ylide_biotin	5	LSALCPK	1	Q14149	MORC family CW-type zinc finger protein 3 OS=Homo sapiens OX=9606 GN=MORC3 PE=1 SV=3	15	IRLSALcPKFLHT
ylide_biotin	8	SRGEEQGCQGDGDAGVK	1	Q13671	Ras and Rab interactor 1 OS=Homo sapiens OX=9606 GN=RIN1 PE=1 SV=4	733	RGEEQGcQGDGDA
ylide_biotin	3	AVCMLSNTTAIAEAWAR	2	Q71U36	Tubulin alpha-1A chain OS=Homo sapiens OX=9606 GN=TUBA1A PE=1 SV=1	376	KVQRAVcMLSNTT
ylide_biotin	15	AYHEQLSVAEITNACFEPANQMVK	11	Q71U36	Tubulin alpha-1A chain OS=Homo sapiens OX=9606 GN=TUBA1A PE=1 SV=1	295	AEITNAcFEPANQ
ylide_biotin	25	AYHEQLSVAEITNACFEPANQMVKCDPRHGK	1	Q71U36	Tubulin alpha-1A chain OS=Homo sapiens OX=9606 GN=TUBA1A PE=1 SV=1	305	ANQMVKcDPRHGK
ylide_biotin	9	RTIQFVDWCPTGFK	1	Q71U36	Tubulin alpha-1A chain OS=Homo sapiens OX=9606 GN=TUBA1A PE=1 SV=1	347	IQFVDWcPTGFKV
ylide_biotin	5	YMACCLLYR	1	Q71U36	Tubulin alpha-1A chain OS=Homo sapiens OX=9606 GN=TUBA1A PE=1 SV=1	316	GKYMACcLLYRGD
ylide_biotin	4	YMACCLLYRGDVVPK	1	Q71U36	Tubulin alpha-1A chain OS=Homo sapiens OX=9606 GN=TUBA1A PE=1 SV=1	315	HGKYMAcCLLYRG
ylide_biotin	7	LESGSICK	1	P15170	Eukaryotic peptide chain release factor GTP-binding subunit ERF3A OS=Homo sapiens OX=9606 GN=GSPT1 PE=1 SV=1	327	LESGSIcKGQQLV
ylide_biotin	16	NVAAYTEQEEADSQGCVQKTYEEK	1	Q13439	Golgin subfamily A member 4 OS=Homo sapiens OX=9606 GN=GOLGA4 PE=1 SV=1	1729	EADSQGcVQKTYE
ylide_biotin	6	FCNTTCLGAYKK	2	Q14202	Zinc finger MYM-type protein 3 OS=Homo sapiens OX=9606 GN=ZMYM3 PE=1 SV=2	484	RFCNTTcLGAYKK
ylide_biotin	4	GVSCKVEMK	1	Q14202	Zinc finger MYM-type protein 3 OS=Homo sapiens OX=9606 GN=ZMYM3 PE=1 SV=2	846	QNRGVScKVEMKS
ylide_biotin	8	KGLPQLFCSSSCLTTFSK	2	Q14202	Zinc finger MYM-type protein 3 OS=Homo sapiens OX=9606 GN=ZMYM3 PE=1 SV=2	335	GLPQLFcSSSCLT
ylide_biotin	12	KGLPQLFCSSSCLTTFSK	2	Q14202	Zinc finger MYM-type protein 3 OS=Homo sapiens OX=9606 GN=ZMYM3 PE=1 SV=2	339	LFCSSScLTTFSK
ylide_biotin	6	LCSDSCFSK	2	Q14202	Zinc finger MYM-type protein 3 OS=Homo sapiens OX=9606 GN=ZMYM3 PE=1 SV=2	436	RLCSDScFSKFRA
ylide_biotin	6	MTCAHCR	3	Q14202	Zinc finger MYM-type protein 3 OS=Homo sapiens OX=9606 GN=ZMYM3 PE=1 SV=2	314	KMTCAHcRTPLQK
ylide_biotin	6	MGAVPCRR	1	Q8IY22	C-Maf-inducing protein OS=Homo sapiens OX=9606 GN=CMIP PE=1 SV=3	40	KMGAVPcRRALLL
ylide_biotin	4	MAGCAARAPPGSEAR	5	O60725	Protein-S-isoprenylcysteine O-methyltransferase OS=Homo sapiens OX=9606 GN=ICMT PE=1 SV=1	4	MAGcAARAPP
ylide_biotin	4	ARSCSAAR	5	Q8IYL3	UPF0688 protein C1orf174 OS=Homo sapiens OX=9606 GN=C1orf174 PE=1 SV=2	21	RLKARScSAARLA
ylide_biotin	18	FFGNVELMQDLPPASSSCPSMSRR	3	Q8IYL3	UPF0688 protein C1orf174 OS=Homo sapiens OX=9606 GN=C1orf174 PE=1 SV=2	215	PPASSScPSMSRR
ylide_biotin	3	TACLTSSSHK	1	Q8IYL3	UPF0688 protein C1orf174 OS=Homo sapiens OX=9606 GN=C1orf174 PE=1 SV=2	42	TSAKTAcLTSSSH
ylide_biotin	6	RNENACKGAPK	1	Q12797	Aspartyl/asparaginyl beta-hydroxylase OS=Homo sapiens OX=9606 GN=ASPH PE=1 SV=3	641	RRNENAcKGAPKT
ylide_biotin	5	LVTECEQK	1	Q06546	GA-binding protein alpha chain OS=Homo sapiens OX=9606 GN=GABPA PE=1 SV=1	421	NRLVTEcEQKKLA
ylide_biotin	5	TTSQCKSEPPLLR	2	Q9NWZ5	Uridine-cytidine kinase-like 1 OS=Homo sapiens OX=9606 GN=UCKL1 PE=1 SV=2	65	KRTTSQcKSEPPL
ylide_biotin	4	AHQCGDDDKTRPLVK	12	Q9BQ61	Telomerase RNA component interacting RNase OS=Homo sapiens OX=9606 GN=TRIR PE=1 SV=1	165	KYKAHQcGDDDKT
ylide_biotin	5	TTNRCEALSQR	1	Q8IWC1	MAP7 domain-containing protein 3 OS=Homo sapiens OX=9606 GN=MAP7D3 PE=1 SV=2	572	SKTTNRcEALSQR
ylide_biotin	16	ESIDGKLPSTDQQESCSSTPGLEEPLFK	1	Q14789	Golgin subfamily B member 1 OS=Homo sapiens OX=9606 GN=GOLGB1 PE=1 SV=2	1257	TDQQEScSSTPGL
ylide_biotin	11	SLSAVPDIGQCHQDELER	1	Q14789	Golgin subfamily B member 1 OS=Homo sapiens OX=9606 GN=GOLGB1 PE=1 SV=2	681	VPDIGQcHQDELE
ylide_biotin	7	VSGYSTCHSR	1	Q5T8I3	Protein FAM102B OS=Homo sapiens OX=9606 GN=FAM102B PE=1 SV=2	222	VSGYSTcHSRSSS
ylide_biotin	15	TSSSDTLSEEKNSECDPTPSHR	1	Q9BXW9	Fanconi anemia group D2 protein OS=Homo sapiens OX=9606 GN=FANCD2 PE=1 SV=2	893	EEKNSEcDPTPSH
ylide_biotin	5	HINFCKEQAAR	3	Q96GY0	Zinc finger C2HC domain-containing protein 1A OS=Homo sapiens OX=9606 GN=ZC2HC1A PE=1 SV=2	141	DRHINFcKEQAAR
ylide_biotin	4	AATCEGSESSGFGKLPK	1	Q9UPN4	Centrosomal protein of 131 kDa OS=Homo sapiens OX=9606 GN=CEP131 PE=1 SV=3	218	IIKAATcEGSESS
ylide_biotin	3	ASCTSSTSGSK	13	P13807	Glycogen [starch] synthase, muscle OS=Homo sapiens OX=9606 GN=GYS1 PE=1 SV=2	699	WPRRAScTSSTSG
ylide_biotin	6	HDCPVCLPLKNAGDKR	1	Q09472	Histone acetyltransferase p300 OS=Homo sapiens OX=9606 GN=EP300 PE=1 SV=2	414	RHDCPVcLPLKNA
ylide_biotin	3	QLCTIPR	2	Q09472	Histone acetyltransferase p300 OS=Homo sapiens OX=9606 GN=EP300 PE=1 SV=2	1183	CYGKQLcTIPRDA
ylide_biotin	21	TGTELVLLTAAPPPPPRPGPCAYAAHGR	1	Q96B36	Proline-rich AKT1 substrate 1 OS=Homo sapiens OX=9606 GN=AKT1S1 PE=1 SV=1	44	PPRPGPcAYAAHG
ylide_biotin	6	KNEGSCGPAR	4	Q9NQZ5	StAR-related lipid transfer protein 7, mitochondrial OS=Homo sapiens OX=9606 GN=STARD7 PE=1 SV=2	362	RKNEGScGPARIE
ylide_biotin	3	MGCLGNSK	1	P63092	Guanine nucleotide-binding protein G(s) subunit alpha isoforms short OS=Homo sapiens OX=9606 GN=GNAS PE=1 SV=1	3	MGcLGNSKT
ylide_biotin	11	IESSSVLSKPCSVTVASEASK	1	O75928	E3 SUMO-protein ligase PIAS2 OS=Homo sapiens OX=9606 GN=PIAS2 PE=1 SV=3	454	SVLSKPcSVTVAS
ylide_biotin	15	AGGIETIANEYSDRCTPACISFGPK	1	P34932	Heat shock 70 kDa protein 4 OS=Homo sapiens OX=9606 GN=HSPA4 PE=1 SV=4	34	NEYSDRcTPACIS
ylide_biotin	4	ARSCEKEVVSAQPATFLAR	1	P28799	Progranulin OS=Homo sapiens OX=9606 GN=GRN PE=1 SV=2	495	NVKARScEKEVVS
ylide_biotin	14	NCNLSHCPIAHSGCAAPGPASYR	1	Q14135	Transcription cofactor vestigial-like protein 4 OS=Homo sapiens OX=9606 GN=VGLL4 PE=1 SV=4	187	PIAHSGcAAPGPA
ylide_biotin	10	QQNRPSVITCASAGAR	5	Q14135	Transcription cofactor vestigial-like protein 4 OS=Homo sapiens OX=9606 GN=VGLL4 PE=1 SV=4	167	RPSVITcASAGAR
ylide_biotin	9	RPPSAATTCDPVVEEHFRR	1	Q14135	Transcription cofactor vestigial-like protein 4 OS=Homo sapiens OX=9606 GN=VGLL4 PE=1 SV=4	205	PSAATTcDPVVEE
ylide_biotin	3	ISCFQSTVK	1	Q9HAD4	WD repeat-containing protein 41 OS=Homo sapiens OX=9606 GN=WDR41 PE=1 SV=3	131	QVQRIScFQSTVK
ylide_biotin	13	MSAHLQWMVVRNCSSFLIK	7	P46779	60S ribosomal protein L28 OS=Homo sapiens OX=9606 GN=RPL28 PE=1 SV=3	13	WMVVRNcSSFLIK
ylide_biotin	5	KGAECFEELSK	1	P23769	Endothelial transcription factor GATA-2 OS=Homo sapiens OX=9606 GN=GATA2 PE=1 SV=3	413	SKKGAEcFEELSK
ylide_biotin	2	SCSEGRECVNCGATATPLWR	1	P23769	Endothelial transcription factor GATA-2 OS=Homo sapiens OX=9606 GN=GATA2 PE=1 SV=3	289	RSKARScSEGREC
ylide_biotin	5	GMETCAMETR	3	Q9H0L4	Cleavage stimulation factor subunit 2 tau variant OS=Homo sapiens OX=9606 GN=CSTF2T PE=1 SV=1	441	RRGMETcAMETRG
ylide_biotin	18	SQSVSVSGPGPGPGPGLCPGPNVLLNQQNPPAPQPQHLAR	2	Q9H0L4	Cleavage stimulation factor subunit 2 tau variant OS=Homo sapiens OX=9606 GN=CSTF2T PE=1 SV=1	222	GPGPGLcPGPNVL
ylide_biotin	7	EILLEGCAEKSK	1	Q6PID6	Tetratricopeptide repeat protein 33 OS=Homo sapiens OX=9606 GN=TTC33 PE=1 SV=2	55	EILLEGcAEKSKQ
ylide_biotin	10	ISTTTSEEPCRDKGSPAVK	1	O15119	T-box transcription factor TBX3 OS=Homo sapiens OX=9606 GN=TBX3 PE=1 SV=4	404	TTSEEPcRDKGSP
ylide_biotin	2	GCGTVLLSGPR	6	Q07020	60S ribosomal protein L18 OS=Homo sapiens OX=9606 GN=RPL18 PE=1 SV=2	134	LDSPKGcGTVLLS
ylide_biotin	10	VQEVPKLKVCALR	1	Q07020	60S ribosomal protein L18 OS=Homo sapiens OX=9606 GN=RPL18 PE=1 SV=2	101	VPKLKVcALRVTS
ylide_biotin	6	AVGRPCYLTR	1	Q9NR80	Rho guanine nucleotide exchange factor 4 OS=Homo sapiens OX=9606 GN=ARHGEF4 PE=1 SV=3	646	KAVGRPcYLTRQK
ylide_biotin	15	QEYDESGPSIVHRKCF	1	P0CG39	POTE ankyrin domain family member J OS=Homo sapiens OX=9606 GN=POTEJ PE=3 SV=1	1037	SIVHRKcF
ylide_biotin	7	YTQPNICRNPVCANR	1	Q14566	DNA replication licensing factor MCM6 OS=Homo sapiens OX=9606 GN=MCM6 PE=1 SV=1	180	YTQPNIcRNPVCA
ylide_biotin	7	ADYCPECYPDNPANR	2	Q9H496	Torsin-1A-interacting protein 2, isoform IFRG15 OS=Homo sapiens OX=9606 GN=TOR1AIP2 PE=1 SV=1	52	ADYCPEcYPDNPA
ylide_biotin	4	ARRCDAGGPR	7	Q9NXG2	THUMP domain-containing protein 1 OS=Homo sapiens OX=9606 GN=THUMPD1 PE=1 SV=2	31	AKRARRcDAGGPR
ylide_biotin	7	DATPVPCGRWAK	2	O00411	DNA-directed RNA polymerase, mitochondrial OS=Homo sapiens OX=9606 GN=POLRMT PE=1 SV=2	119	DATPVPcGRWAKI
ylide_biotin	18	MAFAETYPAASSLPNGDCGRPR	6	P30520	Adenylosuccinate synthetase isozyme 2 OS=Homo sapiens OX=9606 GN=ADSS2 PE=1 SV=3	18	SLPNGDcGRPRAR
ylide_biotin	6	ALSGYCGFMAANLYAR	2	P53618	Coatomer subunit beta OS=Homo sapiens OX=9606 GN=COPB1 PE=1 SV=3	888	KALSGYcGFMAAN
ylide_biotin	5	NEMNCKEDQFQLSLLAAMGNTQR	3	P53618	Coatomer subunit beta OS=Homo sapiens OX=9606 GN=COPB1 PE=1 SV=3	684	AKNEMNcKEDQFQ
ylide_biotin	6	STNMKCLTPEK	1	P53618	Coatomer subunit beta OS=Homo sapiens OX=9606 GN=COPB1 PE=1 SV=3	877	KSTNMKcLTPEKA
ylide_biotin	3	CTCPVLK	1	Q12873	Chromodomain-helicase-DNA-binding protein 3 OS=Homo sapiens OX=9606 GN=CHD3 PE=1 SV=3	502	LCPRCTcPVLKGR
ylide_biotin	6	FAEAECLAESHQHLSK	2	Q12873	Chromodomain-helicase-DNA-binding protein 3 OS=Homo sapiens OX=9606 GN=CHD3 PE=1 SV=3	1838	RFAEAEcLAESHQ
ylide_biotin	14	DTDSDTQDANDSSCKSSER	2	Q9Y2H0	Disks large-associated protein 4 OS=Homo sapiens OX=9606 GN=DLGAP4 PE=1 SV=3	726	DANDSScKSSERS
ylide_biotin	9	LLDLVQQSCNYK	3	P55769	NHP2-like protein 1 OS=Homo sapiens OX=9606 GN=SNU13 PE=1 SV=3	30	DLVQQScNYKQLR
ylide_biotin	15	FTGVASGSTGSTGSCSVGAK	1	Q9UKI8	Serine/threonine-protein kinase tousled-like 1 OS=Homo sapiens OX=9606 GN=TLK1 PE=1 SV=2	81	TGSTGScSVGAKA
ylide_biotin	9	TPDGNLDQCK	3	P30825	High affinity cationic amino acid transporter 1 OS=Homo sapiens OX=9606 GN=SLC7A1 PE=1 SV=1	628	DGNLDQcK
ylide_biotin	5	DYTGCSTSESLSPVK	3	O95297	Myelin protein zero-like protein 1 OS=Homo sapiens OX=9606 GN=MPZL1 PE=1 SV=1	203	KRDYTGcSTSESL
ylide_biotin	4	IVACDGKNTGSNTTE	2	P52657	Transcription initiation factor IIA subunit 2 OS=Homo sapiens OX=9606 GN=GTF2A2 PE=1 SV=1	98	KVKIVAcDGKNTG
ylide_biotin	33	NDPPMEAAGFTAQVIILNHPGQISAGYAPVLDCHTAHIACK	7	P68104	Elongation factor 1-alpha 1 OS=Homo sapiens OX=9606 GN=EEF1A1 PE=1 SV=1	363	YAPVLDcHTAHIA
ylide_biotin	16	SGDAAIVDMVPGKPMCVESFSDYPPLGR	11	P68104	Elongation factor 1-alpha 1 OS=Homo sapiens OX=9606 GN=EEF1A1 PE=1 SV=1	411	VPGKPMcVESFSD
ylide_biotin	21	DADADAGGGADGGDGRGGHSCR	1	Q14657	EKC/KEOPS complex subunit LAGE3 OS=Homo sapiens OX=9606 GN=LAGE3 PE=1 SV=2	23	GRGGHScRGGVDT
ylide_biotin	6	WKAEDCRLLR	1	Q14657	EKC/KEOPS complex subunit LAGE3 OS=Homo sapiens OX=9606 GN=LAGE3 PE=1 SV=2	113	RWKAEDcRLLRIS
ylide_biotin	10	LFTIHQIDACTNNLPK	2	Q9HAU4	E3 ubiquitin-protein ligase SMURF2 OS=Homo sapiens OX=9606 GN=SMURF2 PE=1 SV=1	706	IHQIDAcTNNLPK
ylide_biotin	10	QTSDNLSEECQLAR	1	Q6ULP2	Aftiphilin OS=Homo sapiens OX=9606 GN=AFTPH PE=1 SV=3	511	DNLSEEcQLARKS
ylide_biotin	4	AGHCAPSEAIEK	3	Q15257	Serine/threonine-protein phosphatase 2A activator OS=Homo sapiens OX=9606 GN=PTPA PE=1 SV=3	103	LPRAGHcAPSEAI
ylide_biotin	9	TSDPDVILCNSVELIR	1	Q96CW6	Probable RNA polymerase II nuclear localization protein SLC7A6OS OS=Homo sapiens OX=9606 GN=SLC7A6OS PE=1 SV=2	166	DPDVILcNSVELI
ylide_biotin	6	ADGERCWAAGWPR	1	P49023	Paxillin OS=Homo sapiens OX=9606 GN=PXN PE=1 SV=3	290	RADGERcWAAGWP
ylide_biotin	15	TSSVSNPQDSVGSPCSR	4	P49023	Paxillin OS=Homo sapiens OX=9606 GN=PXN PE=1 SV=3	108	DSVGSPcSRVGEE
ylide_biotin	11	KPRPSEGDEDCLPASK	2	P78346	Ribonuclease P protein subunit p30 OS=Homo sapiens OX=9606 GN=RPP30 PE=1 SV=1	257	SEGDEDcLPASKK
ylide_biotin	6	EADEGCKKPLER	1	Q9NQG5	Regulation of nuclear pre-mRNA domain-containing protein 1B OS=Homo sapiens OX=9606 GN=RPRD1B PE=1 SV=1	100	READEGcKKPLER
ylide_biotin	4	LRGCIGTFSAMNLHSGLR	1	Q6DCA0	AMMECR1-like protein OS=Homo sapiens OX=9606 GN=AMMECR1L PE=1 SV=1	153	DKRLRGcIGTFSA
ylide_biotin	6	VRQDPCEDISR	1	Q9BQI3	Eukaryotic translation initiation factor 2-alpha kinase 1 OS=Homo sapiens OX=9606 GN=EIF2AK1 PE=1 SV=2	140	RVRQDPcEDISRI
ylide_biotin	3	SSCHVSSLR	2	Q9NW08	DNA-directed RNA polymerase III subunit RPC2 OS=Homo sapiens OX=9606 GN=POLR3B PE=1 SV=2	1099	HYCKSScHVSSLR
ylide_biotin	7	RSQGRSCGPASQSTLGLK	2	Q9BXS6	Nucleolar and spindle-associated protein 1 OS=Homo sapiens OX=9606 GN=NUSAP1 PE=1 SV=1	256	RSQGRScGPASQS
ylide_biotin	8	LMCSLCHCPGATIGCDVK	4	Q8IWS0	PHD finger protein 6 OS=Homo sapiens OX=9606 GN=PHF6 PE=1 SV=1	87	MCSLCHcPGATIG
ylide_biotin	4	ATFCLPILGVK	2	O95478	Ribosome biogenesis protein NSA2 homolog OS=Homo sapiens OX=9606 GN=NSA2 PE=1 SV=1	193	ELKATFcLPILGV
ylide_biotin	8	FSEAEQRCVSR	1	P33993	DNA replication licensing factor MCM7 OS=Homo sapiens OX=9606 GN=MCM7 PE=1 SV=4	684	SEAEQRcVSRGFT
ylide_biotin	4	VDHCPIKSR	1	P26885	Peptidyl-prolyl cis-trans isomerase FKBP2 OS=Homo sapiens OX=9606 GN=FKBP2 PE=1 SV=2	42	KKRVDHcPIKSRK
ylide_biotin	4	MDNCHSVSR	2	Q03164	Histone-lysine N-methyltransferase 2A OS=Homo sapiens OX=9606 GN=KMT2A PE=1 SV=5	2783	EPKMDNcHSVSRV
ylide_biotin	8	MQSLQLDCVAVPSSR	1	Q13546	Receptor-interacting serine/threonine-protein kinase 1 OS=Homo sapiens OX=9606 GN=RIPK1 PE=1 SV=3	325	QSLQLDcVAVPSS
ylide_biotin	4	EIDCLSPEAQK	5	Q32MZ4	Leucine-rich repeat flightless-interacting protein 1 OS=Homo sapiens OX=9606 GN=LRRFIP1 PE=1 SV=2	14	QSREIDcLSPEAQ
ylide_biotin	11	IAAESSENVDCPENPK	5	Q32MZ4	Leucine-rich repeat flightless-interacting protein 1 OS=Homo sapiens OX=9606 GN=LRRFIP1 PE=1 SV=2	644	SSENVDcPENPKI
ylide_biotin	7	SEDADRCTLPEHESPSQDISDACEAESTER	3	Q32MZ4	Leucine-rich repeat flightless-interacting protein 1 OS=Homo sapiens OX=9606 GN=LRRFIP1 PE=1 SV=2	726	SEDADRcTLPEHE
ylide_biotin	5	ERSQCGVKAVNK	1	Q8NI27	THO complex subunit 2 OS=Homo sapiens OX=9606 GN=THOC2 PE=1 SV=2	1236	SRERSQcGVKAVN
ylide_biotin	4	SQHCKPEEGLEAR	4	P43357	Melanoma-associated antigen 3 OS=Homo sapiens OX=9606 GN=MAGEA3 PE=1 SV=1	10	EQRSQHcKPEEGL
ylide_biotin	11	LRENELTYYCCKK	1	P13987	CD59 glycoprotein OS=Homo sapiens OX=9606 GN=CD59 PE=1 SV=1	89	ELTYYCcKKDLCN
ylide_biotin	7	LLREDSCNAGPEDIQSR	1	Q9UL63	Muskelin OS=Homo sapiens OX=9606 GN=MKLN1 PE=1 SV=2	446	LLREDScNAGPED
ylide_biotin	4	ILTCNGSVDDSR	1	Q9UL63	Muskelin OS=Homo sapiens OX=9606 GN=MKLN1 PE=1 SV=2	411	GGRILTcNGSVDD
ylide_biotin	13	VHYLFGGNPGKSCSPK	1	Q9UL63	Muskelin OS=Homo sapiens OX=9606 GN=MKLN1 PE=1 SV=2	609	GNPGKScSPKMRL
ylide_biotin	6	LQGVECGLR	1	O43293	Death-associated protein kinase 3 OS=Homo sapiens OX=9606 GN=DAPK3 PE=1 SV=1	451	KLQGVEcGLR
ylide_biotin	8	CLFVHPNCKYDAK	1	Q6PJT7	Zinc finger CCCH domain-containing protein 14 OS=Homo sapiens OX=9606 GN=ZC3H14 PE=1 SV=1	641	LFVHPNcKYDAKC
ylide_biotin	5	FAEKCLFVHPNCK	1	Q6PJT7	Zinc finger CCCH domain-containing protein 14 OS=Homo sapiens OX=9606 GN=ZC3H14 PE=1 SV=1	634	CKFAEKcLFVHPN
ylide_biotin	4	KMECPFYHPK	2	Q6PJT7	Zinc finger CCCH domain-containing protein 14 OS=Homo sapiens OX=9606 GN=ZC3H14 PE=1 SV=1	693	ACKKMEcPFYHPK
ylide_biotin	5	LLERCKYWPACK	1	Q6PJT7	Zinc finger CCCH domain-containing protein 14 OS=Homo sapiens OX=9606 GN=ZC3H14 PE=1 SV=1	601	EKLLERcKYWPAC
ylide_biotin	5	NGDECAYHHPISPCK	2	Q6PJT7	Zinc finger CCCH domain-containing protein 14 OS=Homo sapiens OX=9606 GN=ZC3H14 PE=1 SV=1	613	CKNGDEcAYHHPI
ylide_biotin	5	YFPACKKMECPFYHPK	1	Q6PJT7	Zinc finger CCCH domain-containing protein 14 OS=Homo sapiens OX=9606 GN=ZC3H14 PE=1 SV=1	688	CRYFPAcKKMECP
ylide_biotin	20	ATEPVATSNPAGDPVGSTRCPASEPGLDATTASESR	2	Q27J81	Inverted formin-2 OS=Homo sapiens OX=9606 GN=INF2 PE=1 SV=2	1029	PVGSTRcPASEPG
ylide_biotin	10	KGPGKQEEVCVIDALLADIR	1	Q27J81	Inverted formin-2 OS=Homo sapiens OX=9606 GN=INF2 PE=1 SV=2	971	GKQEEVcVIDALL
ylide_biotin	16	EGEAEGAETTKRPAVCAAVL	1	O96017	Serine/threonine-protein kinase Chk2 OS=Homo sapiens OX=9606 GN=CHEK2 PE=1 SV=1	539	TKRPAVcAAVL
ylide_biotin	7	TLGSGACGEVK	1	O96017	Serine/threonine-protein kinase Chk2 OS=Homo sapiens OX=9606 GN=CHEK2 PE=1 SV=1	231	TLGSGAcGEVKLA
ylide_biotin	2	TCQEQR	2	Q3MHD2	Protein LSM12 homolog OS=Homo sapiens OX=9606 GN=LSM12 PE=1 SV=2	20	QVSCRTcQEQRLQ
ylide_biotin	14	EVLPVDITTAKDACVNNSALGGEVYR	1	Q96EA4	Protein Spindly OS=Homo sapiens OX=9606 GN=SPDL1 PE=1 SV=2	467	TTAKDAcVNNSAL
ylide_biotin	11	LPPQKEETQSCPNSLEDNNLQLEK	1	Q96EA4	Protein Spindly OS=Homo sapiens OX=9606 GN=SPDL1 PE=1 SV=2	490	KEETQScPNSLED
ylide_biotin	16	CPEALFQPSFLGMESCGIHETTFNSIMK	2	P60709	Actin, cytoplasmic 1 OS=Homo sapiens OX=9606 GN=ACTB PE=1 SV=1	272	FLGMEScGIHETT
ylide_biotin	17	MDDDIAALVVDNGSGMCKAGFAGDDAPR	1	P60709	Actin, cytoplasmic 1 OS=Homo sapiens OX=9606 GN=ACTB PE=1 SV=1	17	DNGSGMcKAGFAG
ylide_biotin	15	QEYDESGPSIVHRKCF	1	P60709	Actin, cytoplasmic 1 OS=Homo sapiens OX=9606 GN=ACTB PE=1 SV=1	374	SIVHRKcF
ylide_biotin	4	APQCLGK	3	Q00839	Heterogeneous nuclear ribonucleoprotein U OS=Homo sapiens OX=9606 GN=HNRNPU PE=1 SV=6	562	LQRAPQcLGKFIE
ylide_biotin	5	AVVVCPKDEDYKQR	5	Q00839	Heterogeneous nuclear ribonucleoprotein U OS=Homo sapiens OX=9606 GN=HNRNPU PE=1 SV=6	607	RKAVVVcPKDEDY
ylide_biotin	4	GKVCFEMK	3	Q00839	Heterogeneous nuclear ribonucleoprotein U OS=Homo sapiens OX=9606 GN=HNRNPU PE=1 SV=6	335	VSKGKVcFEMKVT
ylide_biotin	11	GNFTLPEVAECFDEITYVELQKEEAQK	1	Q00839	Heterogeneous nuclear ribonucleoprotein U OS=Homo sapiens OX=9606 GN=HNRNPU PE=1 SV=6	648	LPEVAEcFDEITY
ylide_biotin	8	GPEEKKDCEVVMMIGLPGAGK	3	Q00839	Heterogeneous nuclear ribonucleoprotein U OS=Homo sapiens OX=9606 GN=HNRNPU PE=1 SV=6	497	PEEKKDcEVVMMI
ylide_biotin	3	KMCLFAGFQR	1	Q00839	Heterogeneous nuclear ribonucleoprotein U OS=Homo sapiens OX=9606 GN=HNRNPU PE=1 SV=6	594	AQRRKMcLFAGFQ
ylide_biotin	6	VIGSGCNLDSAR	3	P07195	L-lactate dehydrogenase B chain OS=Homo sapiens OX=9606 GN=LDHB PE=1 SV=2	164	RVIGSGcNLDSAR
ylide_biotin	12	AAAPAPVSEAVCR	2	P20810	Calpastatin OS=Homo sapiens OX=9606 GN=CAST PE=1 SV=4	408	PVSEAVcRTSMCS
ylide_biotin	7	EEKLEKCGEDDETIPSEYR	1	P20810	Calpastatin OS=Homo sapiens OX=9606 GN=CAST PE=1 SV=4	328	EEKLEKcGEDDET
ylide_biotin	29	EGITGPPADSSKPIGPDDAIDALSSDFTCGSPTAAGK	12	P20810	Calpastatin OS=Homo sapiens OX=9606 GN=CAST PE=1 SV=4	241	LSSDFTcGSPTAA
ylide_biotin	25	KSEDSKKPADDQDPIDALSGDLDSCPSTTETSQNTAK	1	P20810	Calpastatin OS=Homo sapiens OX=9606 GN=CAST PE=1 SV=4	661	SGDLDScPSTTET
ylide_biotin	4	TSMCSIQSAPPEPATLK	6	P20810	Calpastatin OS=Homo sapiens OX=9606 GN=CAST PE=1 SV=4	413	VCRTSMcSIQSAP
ylide_biotin	5	KNASCGTR	5	P60468	Protein transport protein Sec61 subunit beta OS=Homo sapiens OX=9606 GN=SEC61B PE=1 SV=2	39	QRKNAScGTRSAG
ylide_biotin	3	MSCGRPPPDVDGMITLK	1	Q9BRL6	Serine/arginine-rich splicing factor 8 OS=Homo sapiens OX=9606 GN=SRSF8 PE=1 SV=1	3	MScGRPPPD
ylide_biotin	8	MAQEFVNCKIQPGK	5	P35754	Glutaredoxin-1 OS=Homo sapiens OX=9606 GN=GLRX PE=1 SV=2	8	AQEFVNcKIQPGK
ylide_biotin	9	VVVFIKPTCPYCR	3	P35754	Glutaredoxin-1 OS=Homo sapiens OX=9606 GN=GLRX PE=1 SV=2	23	VFIKPTcPYCRRA
ylide_biotin	4	ASFCGKR	2	Q07866	Kinesin light chain 1 OS=Homo sapiens OX=9606 GN=KLC1 PE=1 SV=2	559	SGRASFcGKRQQQ
ylide_biotin	7	KVIGIECSSISDYAVK	3	Q99873	Protein arginine N-methyltransferase 1 OS=Homo sapiens OX=9606 GN=PRMT1 PE=1 SV=3	119	KVIGIEcSSISDY
ylide_biotin	11	VEDLTFTSPFCLQVK	3	Q99873	Protein arginine N-methyltransferase 1 OS=Homo sapiens OX=9606 GN=PRMT1 PE=1 SV=3	272	TFTSPFcLQVKRN
ylide_biotin	5	EYDQCRIQVR	1	Q04323	UBX domain-containing protein 1 OS=Homo sapiens OX=9606 GN=UBXN1 PE=1 SV=2	214	KREYDQcRIQVRL
ylide_biotin	6	AMTNHCKSTR	1	Q14966	Zinc finger protein 638 OS=Homo sapiens OX=9606 GN=ZNF638 PE=1 SV=2	1947	KAMTNHcKSTRHK
ylide_biotin	8	EKVWYHVCSSR	3	Q92499	ATP-dependent RNA helicase DDX1 OS=Homo sapiens OX=9606 GN=DDX1 PE=1 SV=2	631	KVWYHVcSSRGKG
ylide_biotin	4	GKGCYNTR	2	Q92499	ATP-dependent RNA helicase DDX1 OS=Homo sapiens OX=9606 GN=DDX1 PE=1 SV=2	638	SSRGKGcYNTRLK
ylide_biotin	5	LKSYCNDQSTGDIK	3	P00492	Hypoxanthine-guanine phosphoribosyltransferase OS=Homo sapiens OX=9606 GN=HPRT1 PE=1 SV=2	106	IRLKSYcNDQSTG
ylide_biotin	10	SSPSHTTNGCQGEK	1	Q8N8R5	Mitochondrial protein C2orf69 OS=Homo sapiens OX=9606 GN=C2orf69 PE=1 SV=1	230	SHTTNGcQGEKVR
ylide_biotin	5	LKESCVR	4	Q9UMY4	Sorting nexin-12 OS=Homo sapiens OX=9606 GN=SNX12 PE=1 SV=4	67	FKLKEScVRRRYS
ylide_biotin	8	MAENGKNCDQR	2	Q96GC9	Vacuole membrane protein 1 OS=Homo sapiens OX=9606 GN=VMP1 PE=1 SV=1	8	AENGKNcDQRRVA
ylide_biotin	8	GNKQEAKCGFSK	6	O76003	Glutaredoxin-3 OS=Homo sapiens OX=9606 GN=GLRX3 PE=1 SV=2	261	NKQEAKcGFSKQI
ylide_biotin	8	GTPQEPRCGFSK	5	O76003	Glutaredoxin-3 OS=Homo sapiens OX=9606 GN=GLRX3 PE=1 SV=2	159	TPQEPRcGFSKQM
ylide_biotin	5	EENGCCSR	1	Q9BRA0	N-alpha-acetyltransferase 38, NatC auxiliary subunit OS=Homo sapiens OX=9606 GN=NAA38 PE=1 SV=1	16	LREENGcCSRRQS
ylide_biotin	9	AQEPLVDGCSGGGR	1	Q7Z2K6	Endoplasmic reticulum metallopeptidase 1 OS=Homo sapiens OX=9606 GN=ERMP1 PE=1 SV=2	43	EPLVDGcSGGGRT
ylide_biotin	7	RVSSGSCFALE	4	Q9NZJ7	Mitochondrial carrier homolog 1 OS=Homo sapiens OX=9606 GN=MTCH1 PE=1 SV=1	385	RVSSGScFALE
ylide_biotin	7	ITENYDCGTKLPGLLK	4	Q9NUQ8	ATP-binding cassette sub-family F member 3 OS=Homo sapiens OX=9606 GN=ABCF3 PE=1 SV=2	102	ITENYDcGTKLPG
ylide_biotin	11	FQPASAPAEDCISSSTEPKPDPK	1	Q14008	Cytoskeleton-associated protein 5 OS=Homo sapiens OX=9606 GN=CKAP5 PE=1 SV=3	1113	SAPAEDcISSSTE
ylide_biotin	12	EQVPSLGSNVACGLAYTDYHK	1	A1L0T0	2-hydroxyacyl-CoA lyase 2 OS=Homo sapiens OX=9606 GN=ILVBL PE=1 SV=2	568	LGSNVAcGLAYTD
ylide_biotin	23	KYTELPHGAISEDQAVGPADIPCDSTGQTST	4	Q9H773	dCTP pyrophosphatase 1 OS=Homo sapiens OX=9606 GN=DCTPP1 PE=1 SV=1	162	GPADIPcDSTGQT
ylide_biotin	21	GTEAGQVGEPGIPTGEAGPSCSSASDKLPR	7	O15355	Protein phosphatase 1G OS=Homo sapiens OX=9606 GN=PPM1G PE=1 SV=1	241	GEAGPScSSASDK
ylide_biotin	12	QLIVANAGDSRCVVSEAGK	2	O15355	Protein phosphatase 1G OS=Homo sapiens OX=9606 GN=PPM1G PE=1 SV=1	351	NAGDSRcVVSEAG
ylide_biotin	5	YGQNCHKGPPHSK	7	O15355	Protein phosphatase 1G OS=Homo sapiens OX=9606 GN=PPM1G PE=1 SV=1	164	TRYGQNcHKGPPH
ylide_biotin	4	SNICRFLTASQDK	2	Q8NB16	Mixed lineage kinase domain-like protein OS=Homo sapiens OX=9606 GN=MLKL PE=1 SV=1	86	SNRSNIcRFLTAS
ylide_biotin	8	AEVSELKCGDLEEELKNVTNNLK	3	P67936	Tropomyosin alpha-4 chain OS=Homo sapiens OX=9606 GN=TPM4 PE=1 SV=3	154	EVSELKcGDLEEE
ylide_biotin	19	EENVGLHQTLDQTLNELNCI	6	P67936	Tropomyosin alpha-4 chain OS=Homo sapiens OX=9606 GN=TPM4 PE=1 SV=3	247	TLNELNcI
ylide_biotin	8	DWGKGMACVGR	1	Q96T88	E3 ubiquitin-protein ligase UHRF1 OS=Homo sapiens OX=9606 GN=UHRF1 PE=1 SV=1	403	WGKGMAcVGRTKE
ylide_biotin	6	TAEQSCDQKLTNTNR	1	Q96T88	E3 ubiquitin-protein ligase UHRF1 OS=Homo sapiens OX=9606 GN=UHRF1 PE=1 SV=1	497	RTAEQScDQKLTN
ylide_biotin	2	VCACHLCGGR	1	Q96T88	E3 ubiquitin-protein ligase UHRF1 OS=Homo sapiens OX=9606 GN=UHRF1 PE=1 SV=1	316	NRLCRVcACHLCG
ylide_biotin	10	RPRPPVLSVCSSSETPYLLK	1	Q9ULJ3	Zinc finger and BTB domain-containing protein 21 OS=Homo sapiens OX=9606 GN=ZBTB21 PE=1 SV=2	283	PPVLSVcSSSETP
ylide_biotin	5	SVIVCQSRNEAQGK	1	Q9ULJ3	Zinc finger and BTB domain-containing protein 21 OS=Homo sapiens OX=9606 GN=ZBTB21 PE=1 SV=2	152	KRSVIVcQSRNEA
ylide_biotin	6	MAVPTCLLQMK	1	Q9P000	COMM domain-containing protein 9 OS=Homo sapiens OX=9606 GN=COMMD9 PE=1 SV=2	147	RMAVPTcLLQMKI
ylide_biotin	6	AVLHLC	2	O43402	ER membrane protein complex subunit 8 OS=Homo sapiens OX=9606 GN=EMC8 PE=1 SV=1	210	KAVLHLc
ylide_biotin	5	LVSRCPADNPGLVQAQPR	3	Q68CZ2	Tensin-3 OS=Homo sapiens OX=9606 GN=TNS3 PE=1 SV=2	615	ARLVSRcPADNPG
ylide_biotin	5	SKKVCNVAPIAGETK	1	Q13823	Nucleolar GTP-binding protein 2 OS=Homo sapiens OX=9606 GN=GNL2 PE=1 SV=1	336	LRSKKVcNVAPIA
ylide_biotin	5	LSDGCHDR	2	Q9BTA9	WW domain-containing adapter protein with coiled-coil OS=Homo sapiens OX=9606 GN=WAC PE=1 SV=3	15	QRLSDGcHDRRGD
ylide_biotin	6	SLVRVCEIQATLR	1	Q9BTA9	WW domain-containing adapter protein with coiled-coil OS=Homo sapiens OX=9606 GN=WAC PE=1 SV=3	615	RSLVRVcEIQATL
ylide_biotin	6	DSFDNCSLGESSK	2	Q5UIP0	Telomere-associated protein RIF1 OS=Homo sapiens OX=9606 GN=RIF1 PE=1 SV=2	1692	RDSFDNcSLGESS
ylide_biotin	4	SKGCDCCGEK	1	Q5UIP0	Telomere-associated protein RIF1 OS=Homo sapiens OX=9606 GN=RIF1 PE=1 SV=2	1732	VRRSKGcDCCGEK
ylide_biotin	14	SLIDNFALNPDILCSAKR	1	Q5UIP0	Telomere-associated protein RIF1 OS=Homo sapiens OX=9606 GN=RIF1 PE=1 SV=2	312	LNPDILcSAKRLK
ylide_biotin	7	TFQTLECQHKR	3	Q5UIP0	Telomere-associated protein RIF1 OS=Homo sapiens OX=9606 GN=RIF1 PE=1 SV=2	1718	TFQTLEcQHKRSR
ylide_biotin	3	ALCTAHEK	1	Q86WB0	Nuclear-interacting partner of ALK OS=Homo sapiens OX=9606 GN=ZC3HC1 PE=1 SV=1	149	ELKKALcTAHEKF
ylide_biotin	4	ARLCSSSSSDTSSR	4	Q86WB0	Nuclear-interacting partner of ALK OS=Homo sapiens OX=9606 GN=ZC3HC1 PE=1 SV=1	406	AKRARLcSSSSSD
ylide_biotin	9	CSSCQAFLCASLQPAFDFDRYK	2	Q86WB0	Nuclear-interacting partner of ALK OS=Homo sapiens OX=9606 GN=ZC3HC1 PE=1 SV=1	125	SCQAFLcASLQPA
ylide_biotin	5	MAAPCEGQAFAVGVEK	7	Q86WB0	Nuclear-interacting partner of ALK OS=Homo sapiens OX=9606 GN=ZC3HC1 PE=1 SV=1	5	MAAPcEGQAFA
ylide_biotin	6	STASECPSLLSTTAEDSLGGDVVDEQGQQEDLEEK	1	Q12894	Interferon-related developmental regulator 2 OS=Homo sapiens OX=9606 GN=IFRD2 PE=1 SV=3	111	RSTASEcPSLLST
ylide_biotin	3	EVCPVLDQFLCHVAK	1	Q9NY27	Serine/threonine-protein phosphatase 4 regulatory subunit 2 OS=Homo sapiens OX=9606 GN=PPP4R2 PE=1 SV=3	22	RGKKEVcPVLDQF
ylide_biotin	11	EGLAESEPMICHTLPLPEGFQVVK	2	P49711	Transcriptional repressor CTCF OS=Homo sapiens OX=9606 GN=CTCF PE=1 SV=1	155	ESEPMIcHTLPLP
ylide_biotin	6	FHCPHCDTVIAR	1	P49711	Transcriptional repressor CTCF OS=Homo sapiens OX=9606 GN=CTCF PE=1 SV=1	442	KFHCPHcDTVIAR
ylide_biotin	5	HADNCAGPDGVEGENGGETK	7	P49711	Transcriptional repressor CTCF OS=Homo sapiens OX=9606 GN=CTCF PE=1 SV=1	577	ARHADNcAGPDGV
ylide_biotin	10	SHTGERPFQCSLCSYASR	4	P49711	Transcriptional repressor CTCF OS=Homo sapiens OX=9606 GN=CTCF PE=1 SV=1	381	GERPFQcSLCSYA
ylide_biotin	5	NSVACPGAQK	1	Q5RL73	RNA-binding protein 48 OS=Homo sapiens OX=9606 GN=RBM48 PE=1 SV=1	258	LKNSVAcPGAQKA
ylide_biotin	7	LGSLRWCGR	1	Q5SY16	Polynucleotide 5'-hydroxyl-kinase NOL9 OS=Homo sapiens OX=9606 GN=NOL9 PE=1 SV=1	43	LGSLRWcGRRRLR
ylide_biotin	4	RGSCRSTWLR	1	Q5SY16	Polynucleotide 5'-hydroxyl-kinase NOL9 OS=Homo sapiens OX=9606 GN=NOL9 PE=1 SV=1	13	LLKRGScRSTWLR
ylide_biotin	12	SAPINSDSQGRCGTR	1	P78356	Phosphatidylinositol 5-phosphate 4-kinase type-2 beta OS=Homo sapiens OX=9606 GN=PIP4K2B PE=1 SV=1	135	SDSQGRcGTRFLT
ylide_biotin	5	AAHGCVTAVSGK	1	O75410	Transforming acidic coiled-coil-containing protein 1 OS=Homo sapiens OX=9606 GN=TACC1 PE=1 SV=2	174	TKAAHGcVTAVSG
ylide_biotin	5	AGNSCPELVPSR	2	O75410	Transforming acidic coiled-coil-containing protein 1 OS=Homo sapiens OX=9606 GN=TACC1 PE=1 SV=2	219	LKAGNScPELVPS
ylide_biotin	6	LASTSCGQK	2	O75410	Transforming acidic coiled-coil-containing protein 1 OS=Homo sapiens OX=9606 GN=TACC1 PE=1 SV=2	514	KLASTScGQKSAG
ylide_biotin	6	LITSGCKVK	1	O75410	Transforming acidic coiled-coil-containing protein 1 OS=Homo sapiens OX=9606 GN=TACC1 PE=1 SV=2	467	RLITSGcKVKKHE
ylide_biotin	8	NEEALKKCAQDYLAR	1	O75410	Transforming acidic coiled-coil-containing protein 1 OS=Homo sapiens OX=9606 GN=TACC1 PE=1 SV=2	715	EEALKKcAQDYLA
ylide_biotin	3	GLCAIAQAESLR	13	P23396	40S ribosomal protein S3 OS=Homo sapiens OX=9606 GN=RPS3 PE=1 SV=2	97	VATRGLcAIAQAE
ylide_biotin	17	GGEPKGPEDSGAGGTGCGGADDPAK	1	P78337	Pituitary homeobox 1 OS=Homo sapiens OX=9606 GN=PITX1 PE=1 SV=2	77	GAGGTGcGGADDP
ylide_biotin	29	AFPQLGGRPGPEGEGSLESQPPPLQTQACPESSCLR	4	O94992	Protein HEXIM1 OS=Homo sapiens OX=9606 GN=HEXIM1 PE=1 SV=1	79	PLQTQAcPESSCL
ylide_biotin	18	MAEPFLSEYQHQPQTSNCTGAAAVQEELNPERPPGAEER	3	O94992	Protein HEXIM1 OS=Homo sapiens OX=9606 GN=HEXIM1 PE=1 SV=1	18	QPQTSNcTGAAAV
ylide_biotin	6	EGATSCSASGIR	1	A7E2V4	Zinc finger SWIM domain-containing protein 8 OS=Homo sapiens OX=9606 GN=ZSWIM8 PE=1 SV=1	1441	REGATScSASGIR
ylide_biotin	15	MAEGGSGDVDDAGDCSGAR	1	Q9UH62	Armadillo repeat-containing X-linked protein 3 OS=Homo sapiens OX=9606 GN=ARMCX3 PE=1 SV=1	52	VDDAGDcSGARYN
ylide_biotin	3	NQCLFTNTQCK	1	Q9UL40	Zinc finger protein 346 OS=Homo sapiens OX=9606 GN=ZNF346 PE=1 SV=1	68	MIQKNQcLFTNTQ
ylide_biotin	4	SRECDITK	3	Q13427	Peptidyl-prolyl cis-trans isomerase G OS=Homo sapiens OX=9606 GN=PPIG PE=1 SV=2	549	QSRSREcDITKGK
ylide_biotin	12	KSVSPSASPVVCYQSNRDELR	3	Q12841	Follistatin-related protein 1 OS=Homo sapiens OX=9606 GN=FSTL1 PE=1 SV=1	113	SASPVVcYQSNRD
ylide_biotin	9	IQVDYDGHCKEKK	2	Q12841	Follistatin-related protein 1 OS=Homo sapiens OX=9606 GN=FSTL1 PE=1 SV=1	98	VDYDGHcKEKKSV
ylide_biotin	6	FADLPCELQDMVR	4	Q5JTD0	Tight junction-associated protein 1 OS=Homo sapiens OX=9606 GN=TJAP1 PE=1 SV=1	196	KFADLPcELQDMV
ylide_biotin	7	NSPLPNCTYATR	5	Q5JTD0	Tight junction-associated protein 1 OS=Homo sapiens OX=9606 GN=TJAP1 PE=1 SV=1	350	NSPLPNcTYATRQ
ylide_biotin	6	AGDWKCPNPTCENMNFSWR	5	P35637	RNA-binding protein FUS OS=Homo sapiens OX=9606 GN=FUS PE=1 SV=1	428	RAGDWKcPNPTCE
ylide_biotin	11	AGDWKCPNPTCENMNFSWR	2	P35637	RNA-binding protein FUS OS=Homo sapiens OX=9606 GN=FUS PE=1 SV=1	433	KCPNPTcENMNFS
ylide_biotin	17	CPNPTCENMNFSWRNECNQCK	1	P35637	RNA-binding protein FUS OS=Homo sapiens OX=9606 GN=FUS PE=1 SV=1	444	FSWRNEcNQCKAP
ylide_biotin	6	NECNQCKAPKPDGPGGGPGGSHMGGNYGDDR	1	P35637	RNA-binding protein FUS OS=Homo sapiens OX=9606 GN=FUS PE=1 SV=1	447	RNECNQcKAPKPD
ylide_biotin	6	VQRGECQTTIQGQAR	1	Q9UIF9	Bromodomain adjacent to zinc finger domain protein 2A OS=Homo sapiens OX=9606 GN=BAZ2A PE=1 SV=4	726	KVQRGEcQTTIQG
ylide_biotin	3	SYCLENEEAVRK	1	Q9NVR0	Kelch-like protein 11 OS=Homo sapiens OX=9606 GN=KLHL11 PE=1 SV=1	570	CCPKSYcLENEEA
ylide_biotin	4	VVHCQPLDLK	1	Q9C004	Protein sprouty homolog 4 OS=Homo sapiens OX=9606 GN=SPRY4 PE=1 SV=2	138	QPKVVHcQPLDLK
ylide_biotin	9	MSTVHEILCK	24	P07355	Annexin A2 OS=Homo sapiens OX=9606 GN=ANXA2 PE=1 SV=2	9	TVHEILcKLSLEG
ylide_biotin	8	DKEEIVICDR	2	Q9NRR5	Ubiquilin-4 OS=Homo sapiens OX=9606 GN=UBQLN4 PE=1 SV=2	29	KEEIVIcDRASVK
ylide_biotin	8	AKENDENCGPTTTVFVGNISEK	2	P49756	RNA-binding protein 25 OS=Homo sapiens OX=9606 GN=RBM25 PE=1 SV=3	83	KENDENcGPTTTV
ylide_biotin	16	LNLSGVNLPGVLQQGCVSAKAPVLSGR	1	Q70E73	Ras-associated and pleckstrin homology domains-containing protein 1 OS=Homo sapiens OX=9606 GN=RAPH1 PE=1 SV=3	1045	GVLQQGcVSAKAP
ylide_biotin	2	ACSDGR	6	Q5T3I0	G patch domain-containing protein 4 OS=Homo sapiens OX=9606 GN=GPATCH4 PE=1 SV=2	370	EAESRAcSDGRSR
ylide_biotin	6	AYADPCSR	6	Q5T3I0	G patch domain-containing protein 4 OS=Homo sapiens OX=9606 GN=GPATCH4 PE=1 SV=2	333	RAYADPcSRRKKR
ylide_biotin	11	ILTDEMLLQACEGR	4	Q5T3I0	G patch domain-containing protein 4 OS=Homo sapiens OX=9606 GN=GPATCH4 PE=1 SV=2	152	EMLLQAcEGRTAH
ylide_biotin	6	EILLGCTAATPPSKDPR	1	Q9Y4C1	Lysine-specific demethylase 3A OS=Homo sapiens OX=9606 GN=KDM3A PE=1 SV=4	304	KEILLGcTAATPP
ylide_biotin	9	ILTEPKGSCTQPK	1	Q9Y4C1	Lysine-specific demethylase 3A OS=Homo sapiens OX=9606 GN=KDM3A PE=1 SV=4	390	TEPKGScTQPKTN
ylide_biotin	12	LVGAGAAAGESCPDAPRAPQTSSQR	1	Q96N21	AP-4 complex accessory subunit Tepsin OS=Homo sapiens OX=9606 GN=TEPSIN PE=1 SV=1	493	AAAGEScPDAPRA
ylide_biotin	20	TASISSSPSEGTPTVGSYGCTPQSLPK	1	Q6PKG0	La-related protein 1 OS=Homo sapiens OX=9606 GN=LARP1 PE=1 SV=2	864	TVGSYGcTPQSLP
ylide_biotin	12	DRQFQYIAIELCAATLQEYVEQK	1	O75460	Serine/threonine-protein kinase/endoribonuclease IRE1 OS=Homo sapiens OX=9606 GN=ERN1 PE=1 SV=2	645	YIAIELcAATLQE
ylide_biotin	5	YKSLCMFEIPKE	2	Q9NWA0	Mediator of RNA polymerase II transcription subunit 9 OS=Homo sapiens OX=9606 GN=MED9 PE=1 SV=1	139	QKYKSLcMFEIPK
ylide_biotin	6	APPTACYAGAAPAPSQVK	6	P17676	CCAAT/enhancer-binding protein beta OS=Homo sapiens OX=9606 GN=CEBPB PE=1 SV=2	248	KAPPTAcYAGAAP
ylide_biotin	7	GALHPGCFAPLHPPPPPPPPPAELK	1	P17676	CCAAT/enhancer-binding protein beta OS=Homo sapiens OX=9606 GN=CEBPB PE=1 SV=2	156	GALHPGcFAPLHP
ylide_biotin	8	LVAWDPACLPLPPPPPAFK	1	P17676	CCAAT/enhancer-binding protein beta OS=Homo sapiens OX=9606 GN=CEBPB PE=1 SV=2	11	VAWDPAcLPLPPP
ylide_biotin	13	QLPEPLLASSGHC	5	P17676	CCAAT/enhancer-binding protein beta OS=Homo sapiens OX=9606 GN=CEBPB PE=1 SV=2	345	LASSGHc
ylide_biotin	15	GAEPETGSAVSAAQCQVGPTR	2	Q9UI10	Translation initiation factor eIF-2B subunit delta OS=Homo sapiens OX=9606 GN=EIF2B4 PE=1 SV=2	69	AVSAAQcQVGPTR
ylide_biotin	7	ACQVAHCASSR	1	Q92793	CREB-binding protein OS=Homo sapiens OX=9606 GN=CREBBP PE=1 SV=3	409	ACQVAHcASSRQI
ylide_biotin	3	QLCTIPR	2	Q92793	CREB-binding protein OS=Homo sapiens OX=9606 GN=CREBBP PE=1 SV=3	1219	CYGKQLcTIPRDA
ylide_biotin	8	GGASSSCCEEEQTQGR	1	Q9UJK0	18S rRNA aminocarboxypropyltransferase OS=Homo sapiens OX=9606 GN=TSR3 PE=1 SV=1	284	GASSSCcEEEQTQ
ylide_biotin	3	GGCKIKEIR	8	Q15365	Poly(rC)-binding protein 1 OS=Homo sapiens OX=9606 GN=PCBP1 PE=1 SV=2	118	LIGKGGcKIKEIR
ylide_biotin	8	INISEGNCPER	14	Q15365	Poly(rC)-binding protein 1 OS=Homo sapiens OX=9606 GN=PCBP1 PE=1 SV=2	54	NISEGNcPERIIT
ylide_biotin	9	LSSEKGMGCS	1	Q15365	Poly(rC)-binding protein 1 OS=Homo sapiens OX=9606 GN=PCBP1 PE=1 SV=2	355	SEKGMGcS
ylide_biotin	8	LVVPATQCGSLIGK	7	Q15365	Poly(rC)-binding protein 1 OS=Homo sapiens OX=9606 GN=PCBP1 PE=1 SV=2	109	VVPATQcGSLIGK
ylide_biotin	17	VMTIPYQPMPASSPVICAGGQDR	7	Q15365	Poly(rC)-binding protein 1 OS=Homo sapiens OX=9606 GN=PCBP1 PE=1 SV=2	194	ASSPVIcAGGQDR
ylide_biotin	7	ETTHRYCANAFK	1	P61221	ATP-binding cassette sub-family E member 1 OS=Homo sapiens OX=9606 GN=ABCE1 PE=1 SV=1	88	ETTHRYcANAFKL
ylide_biotin	7	AQNTWGCGNSLR	6	P02545	Prelamin-A/C OS=Homo sapiens OX=9606 GN=LMNA PE=1 SV=1	522	AQNTWGcGNSLRT
ylide_biotin	6	SRTVLCGTCGQPADK	3	P02545	Prelamin-A/C OS=Homo sapiens OX=9606 GN=LMNA PE=1 SV=1	588	RSRTVLcGTCGQP
ylide_biotin	25	SVTVVEDDEDEDGDDLLHHHHGSHCSSSGDPAEYNLR	5	P02545	Prelamin-A/C OS=Homo sapiens OX=9606 GN=LMNA PE=1 SV=1	570	HHHGSHcSSSGDP
ylide_biotin	7	TVLCGTCGQPADK	6	P02545	Prelamin-A/C OS=Homo sapiens OX=9606 GN=LMNA PE=1 SV=1	591	TVLCGTcGQPADK
ylide_biotin	9	SLDGLSEACGGAGSSGSAESGAGGGRR	2	Q96GS4	BLOC-1-related complex subunit 6 OS=Homo sapiens OX=9606 GN=BORCS6 PE=1 SV=2	176	DGLSEAcGGAGSS
ylide_biotin	4	TSSCGVVHRPER	2	Q96GS4	BLOC-1-related complex subunit 6 OS=Homo sapiens OX=9606 GN=BORCS6 PE=1 SV=2	67	SPKTSScGVVHRP
ylide_biotin	10	DLATPVMQPCTALDSHKELNTSSK	1	Q9NUQ3	Gamma-taxilin OS=Homo sapiens OX=9606 GN=TXLNG PE=1 SV=2	480	TPVMQPcTALDSH
ylide_biotin	5	LAALCKK	1	Q9NUQ3	Gamma-taxilin OS=Homo sapiens OX=9606 GN=TXLNG PE=1 SV=2	160	EKLAALcKKYADL
ylide_biotin	8	NLVSPAYCTQESREEIPGGEAR	4	Q9NUQ3	Gamma-taxilin OS=Homo sapiens OX=9606 GN=TXLNG PE=1 SV=2	101	LVSPAYcTQESRE
ylide_biotin	12	TDPPDGQQDSECNRNK	4	Q9NUQ3	Gamma-taxilin OS=Homo sapiens OX=9606 GN=TXLNG PE=1 SV=2	127	GQQDSEcNRNKEK
ylide_biotin	4	FSTCRICK	5	Q9P021	Cysteine-rich PDZ-binding protein OS=Homo sapiens OX=9606 GN=CRIPT PE=1 SV=1	58	KNKFSTcRICKSS
ylide_biotin	3	MVCEKCEK	4	Q9P021	Cysteine-rich PDZ-binding protein OS=Homo sapiens OX=9606 GN=CRIPT PE=1 SV=1	3	MVcEKCEKK
ylide_biotin	6	MVCEKCEKK	1	Q9P021	Cysteine-rich PDZ-binding protein OS=Homo sapiens OX=9606 GN=CRIPT PE=1 SV=1	6	MVCEKcEKKLGT
ylide_biotin	11	SSVHQPGSHYCQGCAYK	1	Q9P021	Cysteine-rich PDZ-binding protein OS=Homo sapiens OX=9606 GN=CRIPT PE=1 SV=1	73	QPGSHYcQGCAYK
ylide_biotin	14	SSVHQPGSHYCQGCAYKK	1	Q9P021	Cysteine-rich PDZ-binding protein OS=Homo sapiens OX=9606 GN=CRIPT PE=1 SV=1	76	SHYCQGcAYKKGI
ylide_biotin	10	IITGEKNLPCANVR	1	Q5T1V6	Probable ATP-dependent RNA helicase DDX59 OS=Homo sapiens OX=9606 GN=DDX59 PE=1 SV=1	414	GEKNLPcANVRQI
ylide_biotin	9	NANDDGKSCVAK	2	Q5T1V6	Probable ATP-dependent RNA helicase DDX59 OS=Homo sapiens OX=9606 GN=DDX59 PE=1 SV=1	20	NDDGKScVAKIIK
ylide_biotin	7	IQQDSGCKVQISPDSGGLPER	1	Q92945	Far upstream element-binding protein 2 OS=Homo sapiens OX=9606 GN=KHSRP PE=1 SV=4	176	IQQDSGcKVQISP
ylide_biotin	3	AACGKGGMCPFR	1	O95639	Cleavage and polyadenylation specificity factor subunit 4 OS=Homo sapiens OX=9606 GN=CPSF4 PE=1 SV=1	49	FFLKAAcGKGGMC
ylide_biotin	6	SGAAVCEFFLK	2	O95639	Cleavage and polyadenylation specificity factor subunit 4 OS=Homo sapiens OX=9606 GN=CPSF4 PE=1 SV=1	41	KSGAAVcEFFLKA
ylide_biotin	6	LQEVECEEQR	3	Q13596	Sorting nexin-1 OS=Homo sapiens OX=9606 GN=SNX1 PE=1 SV=3	318	KLQEVEcEEQRLR
ylide_biotin	8	MASGGGGCSASER	4	Q13596	Sorting nexin-1 OS=Homo sapiens OX=9606 GN=SNX1 PE=1 SV=3	8	ASGGGGcSASERL
ylide_biotin	2	MCQVGEDYGEPAPEEPPPAPRPSR	2	Q2VPK5	Cytoplasmic tRNA 2-thiolation protein 2 OS=Homo sapiens OX=9606 GN=CTU2 PE=1 SV=1	2	McQVGEDY
ylide_biotin	17	EMFPYEASTPTGISASCRRPIK	1	P42167	Lamina-associated polypeptide 2, isoforms beta/gamma OS=Homo sapiens OX=9606 GN=TMPO PE=1 SV=2	363	TGISAScRRPIKG
ylide_biotin	7	IISNASCTTNCLAPLAK	2	P04406	Glyceraldehyde-3-phosphate dehydrogenase OS=Homo sapiens OX=9606 GN=GAPDH PE=1 SV=3	152	IISNAScTTNCLA
ylide_biotin	13	VPTANVSVVDLTCRLEKPAK	2	P04406	Glyceraldehyde-3-phosphate dehydrogenase OS=Homo sapiens OX=9606 GN=GAPDH PE=1 SV=3	247	SVVDLTcRLEKPA
ylide_biotin	4	QKPCDLPLR	1	O00425	Insulin-like growth factor 2 mRNA-binding protein 3 OS=Homo sapiens OX=9606 GN=IGF2BP3 PE=1 SV=2	194	VSKQKPcDLPLRL
ylide_biotin	9	SGLGSGPKCCH	9	O14880	Microsomal glutathione S-transferase 3 OS=Homo sapiens OX=9606 GN=MGST3 PE=1 SV=1	150	LGSGPKcCH
ylide_biotin	10	SGLGSGPKCCH	6	O14880	Microsomal glutathione S-transferase 3 OS=Homo sapiens OX=9606 GN=MGST3 PE=1 SV=1	151	GSGPKCcH
ylide_biotin	23	ANDGGLAAGAPAMHMASYGPEPCTDNSDSLIAK	1	O43823	A-kinase anchor protein 8 OS=Homo sapiens OX=9606 GN=AKAP8 PE=1 SV=1	85	SYGPEPcTDNSDS
ylide_biotin	11	NGSFGGQYSECRDPAR	2	O43823	A-kinase anchor protein 8 OS=Homo sapiens OX=9606 GN=AKAP8 PE=1 SV=1	173	GGQYSEcRDPARE
ylide_biotin	5	TSVPCAGATAFPADSDR	1	Q9Y4P1	Cysteine protease ATG4B OS=Homo sapiens OX=9606 GN=ATG4B PE=1 SV=2	189	CRTSVPcAGATAF
ylide_biotin	12	LADLTGPIIPKCRSGV	1	P28289	Tropomodulin-1 OS=Homo sapiens OX=9606 GN=TMOD1 PE=1 SV=1	355	GPIIPKcRSGV
ylide_biotin	11	DITDPLSLNTCTDEGHVVLASPLK	7	Q7L2J0	7SK snRNA methylphosphate capping enzyme OS=Homo sapiens OX=9606 GN=MEPCE PE=1 SV=1	244	PLSLNTcTDEGHV
ylide_biotin	5	GPGRCAPSAGSPAAAVGR	1	Q7L2J0	7SK snRNA methylphosphate capping enzyme OS=Homo sapiens OX=9606 GN=MEPCE PE=1 SV=1	54	ERGPGRcAPSAGS
ylide_biotin	4	KRSCFPASLTASR	2	Q7L2J0	7SK snRNA methylphosphate capping enzyme OS=Homo sapiens OX=9606 GN=MEPCE PE=1 SV=1	522	TVRKRScFPASLT
ylide_biotin	4	NPSCEDGRLR	2	Q7L2J0	7SK snRNA methylphosphate capping enzyme OS=Homo sapiens OX=9606 GN=MEPCE PE=1 SV=1	429	GYRNPScEDGRLR
ylide_biotin	4	MSSCSRVALVTGANR	1	O75828	Carbonyl reductase [NADPH] 3 OS=Homo sapiens OX=9606 GN=CBR3 PE=1 SV=3	4	MSScSRVALV
ylide_biotin	17	FEPPLFHPNVYPSGTVCLSILEEDKDWRPAITIK	1	P63279	SUMO-conjugating enzyme UBC9 OS=Homo sapiens OX=9606 GN=UBE2I PE=1 SV=1	93	YPSGTVcLSILEE
ylide_biotin	2	ACPLQPDHTNDEKE	3	Q15004	PCNA-associated factor OS=Homo sapiens OX=9606 GN=PCLAF PE=1 SV=1	99	KAKRKAcPLQPDH
ylide_biotin	8	YAGGNPVCVRPTPK	2	Q15004	PCNA-associated factor OS=Homo sapiens OX=9606 GN=PCLAF PE=1 SV=1	54	AGGNPVcVRPTPK
ylide_biotin	3	KICSHSAPEQQAR	2	O75683	Surfeit locus protein 6 OS=Homo sapiens OX=9606 GN=SURF6 PE=1 SV=3	19	SLAKKIcSHSAPE
ylide_biotin	10	ATSAGSSPSCSLAGR	2	Q9BXB5	Oxysterol-binding protein-related protein 10 OS=Homo sapiens OX=9606 GN=OSBPL10 PE=1 SV=2	33	AGSSPScSLAGRG
ylide_biotin	16	SLTLLPHGTPNSASPCSQR	1	Q9BXB5	Oxysterol-binding protein-related protein 10 OS=Homo sapiens OX=9606 GN=OSBPL10 PE=1 SV=2	203	PNSASPcSQRHLS
ylide_biotin	5	SPASCHEHPMADDPSK	1	Q9BXB5	Oxysterol-binding protein-related protein 10 OS=Homo sapiens OX=9606 GN=OSBPL10 PE=1 SV=2	511	SRSPAScHEHPMA
ylide_biotin	9	MVQVHELGCEGISK	3	Q15436	Protein transport protein Sec23A OS=Homo sapiens OX=9606 GN=SEC23A PE=1 SV=2	180	QVHELGcEGISKS
ylide_biotin	6	AGGRDCGTSVPQGLLK	4	Q9H9A6	Leucine-rich repeat-containing protein 40 OS=Homo sapiens OX=9606 GN=LRRC40 PE=1 SV=1	23	KAGGRDcGTSVPQ
ylide_biotin	4	NQLCEIPKR	1	Q9H9A6	Leucine-rich repeat-containing protein 40 OS=Homo sapiens OX=9606 GN=LRRC40 PE=1 SV=1	438	FSKNQLcEIPKRM
ylide_biotin	7	ASPSVTCKSSSESK	2	O15014	Zinc finger protein 609 OS=Homo sapiens OX=9606 GN=ZNF609 PE=1 SV=2	1290	ASPSVTcKSSSES
ylide_biotin	7	SEGVGTCSEKDPGVLQPVPLGGR	1	O15014	Zinc finger protein 609 OS=Homo sapiens OX=9606 GN=ZNF609 PE=1 SV=2	178	SEGVGTcSEKDPG
ylide_biotin	5	TGAECGRQAEMDPILWYR	1	O15014	Zinc finger protein 609 OS=Homo sapiens OX=9606 GN=ZNF609 PE=1 SV=2	1120	AKTGAEcGRQAEM
ylide_biotin	4	NLKCGSGAR	2	Q15628	Tumor necrosis factor receptor type 1-associated DEATH domain protein OS=Homo sapiens OX=9606 GN=TRADD PE=1 SV=2	164	ALRNLKcGSGARG
ylide_biotin	9	ANKLFTNDCIFLKK	1	Q8IV50	LysM and putative peptidoglycan-binding domain-containing protein 2 OS=Homo sapiens OX=9606 GN=LYSMD2 PE=1 SV=1	106	KLFTNDcIFLKKT
ylide_biotin	8	SEEAPAGCGAEGGGPGSGPFADLAPGAVHMR	6	Q9BUL9	Ribonuclease P protein subunit p25 OS=Homo sapiens OX=9606 GN=RPP25 PE=1 SV=1	16	EEAPAGcGAEGGG
ylide_biotin	11	EAELSKGESVCLDRCVSK	2	P62072	Mitochondrial import inner membrane translocase subunit Tim10 OS=Homo sapiens OX=9606 GN=TIMM10 PE=1 SV=1	50	SKGESVcLDRCVS
ylide_biotin	5	MTSACHRK	4	P62072	Mitochondrial import inner membrane translocase subunit Tim10 OS=Homo sapiens OX=9606 GN=TIMM10 PE=1 SV=1	29	NRMTSAcHRKCVP
ylide_biotin	4	ESVCNKADAESEPVAQK	1	O95243	Methyl-CpG-binding domain protein 4 OS=Homo sapiens OX=9606 GN=MBD4 PE=1 SV=1	268	SKRESVcNKADAE
ylide_biotin	9	SLSSGSNFCSEQK	1	O95243	Methyl-CpG-binding domain protein 4 OS=Homo sapiens OX=9606 GN=MBD4 PE=1 SV=1	324	SSGSNFcSEQKTS
ylide_biotin	7	LLPVEPCDLTEGFDPSVPPR	1	O14893	Gem-associated protein 2 OS=Homo sapiens OX=9606 GN=GEMIN2 PE=1 SV=1	34	LLPVEPcDLTEGF
ylide_biotin	9	REDDVIKTC	1	Q8WWH5	Probable tRNA pseudouridine synthase 1 OS=Homo sapiens OX=9606 GN=TRUB1 PE=1 SV=1	349	DDVIKTc
ylide_biotin	12	GGGGGGGGGGGCSGSGSSASR	1	P42356	Phosphatidylinositol 4-kinase alpha OS=Homo sapiens OX=9606 GN=PI4KA PE=1 SV=4	19	GGGGGGcSGSGSS
ylide_biotin	7	AVEAEKCAR	1	P48681	Nestin OS=Homo sapiens OX=9606 GN=NES PE=1 SV=2	121	AVEAEKcARAWLS
ylide_biotin	3	SLCFRPGPALPSTR	4	Q86WR7	Proline and serine-rich protein 2 OS=Homo sapiens OX=9606 GN=PROSER2 PE=1 SV=2	367	PAGKSLcFRPGPA
ylide_biotin	7	IANLGSCNDSKLEFR	1	Q9HCY8	Protein S100-A14 OS=Homo sapiens OX=9606 GN=S100A14 PE=1 SV=1	74	IANLGScNDSKLE
ylide_biotin	14	LPPSGSKPVAASTCSGKK	2	O43663	Protein regulator of cytokinesis 1 OS=Homo sapiens OX=9606 GN=PRC1 PE=1 SV=2	531	PVAASTcSGKKTP
ylide_biotin	15	LPFLDSQTGVAQSNCYIWMEKR	1	Q92785	Zinc finger protein ubi-d4 OS=Homo sapiens OX=9606 GN=DPF2 PE=1 SV=2	53	GVAQSNcYIWMEK
ylide_biotin	6	SGHPSCLQFTPVMMAAVK	1	Q92785	Zinc finger protein ubi-d4 OS=Homo sapiens OX=9606 GN=DPF2 PE=1 SV=2	306	RSGHPScLQFTPV
ylide_biotin	6	WQCIECK	2	Q92785	Zinc finger protein ubi-d4 OS=Homo sapiens OX=9606 GN=DPF2 PE=1 SV=2	327	RWQCIEcKCCNIC
ylide_biotin	9	GIMEEDEACGRQYTLK	6	P14923	Junction plakoglobin OS=Homo sapiens OX=9606 GN=JUP PE=1 SV=3	49	MEEDEAcGRQYTL
ylide_biotin	5	VLSVCPSNKPAIVEAGGMQALGK	5	P14923	Junction plakoglobin OS=Homo sapiens OX=9606 GN=JUP PE=1 SV=3	341	LKVLSVcPSNKPA
ylide_biotin	6	VREAMCPGVSGEDSSLLLATQVEGQATNLQR	4	P14923	Junction plakoglobin OS=Homo sapiens OX=9606 GN=JUP PE=1 SV=3	90	RVREAMcPGVSGE
ylide_biotin	6	DGQVQCLNCPEPK	1	Q9UBS8	E3 ubiquitin-protein ligase RNF14 OS=Homo sapiens OX=9606 GN=RNF14 PE=1 SV=1	262	RDGQVQcLNCPEP
ylide_biotin	9	LTYHGVSPCKVTAEK	1	Q9UBS8	E3 ubiquitin-protein ligase RNF14 OS=Homo sapiens OX=9606 GN=RNF14 PE=1 SV=1	350	YHGVSPcKVTAEK
ylide_biotin	4	SCPCCGTPIEK	1	Q9UBS8	E3 ubiquitin-protein ligase RNF14 OS=Homo sapiens OX=9606 GN=RNF14 PE=1 SV=1	406	NSKSCPcCGTPIE
ylide_biotin	7	LLDRDACDTVR	7	Q9NZL4	Hsp70-binding protein 1 OS=Homo sapiens OX=9606 GN=HSPBP1 PE=1 SV=2	201	LLDRDAcDTVRVK
ylide_biotin	3	SSCSPGGR	1	Q6UB35	Monofunctional C1-tetrahydrofolate synthase, mitochondrial OS=Homo sapiens OX=9606 GN=MTHFD1L PE=1 SV=1	61	GQARSScSPGGRT
ylide_biotin	3	VGCGSPR	1	Q6UB35	Monofunctional C1-tetrahydrofolate synthase, mitochondrial OS=Homo sapiens OX=9606 GN=MTHFD1L PE=1 SV=1	302	LSGKVGcGSPRIH
ylide_biotin	9	EQHGVAASCLEDLRSK	2	O00273	DNA fragmentation factor subunit alpha OS=Homo sapiens OX=9606 GN=DFFA PE=1 SV=1	38	HGVAAScLEDLRS
ylide_biotin	3	QSCATVQR	1	O00273	DNA fragmentation factor subunit alpha OS=Homo sapiens OX=9606 GN=DFFA PE=1 SV=1	165	QELRQScATVQRL
ylide_biotin	10	SEIDLNLIKCHFK	5	Q5VT79	Annexin A8-like protein 1 OS=Homo sapiens OX=9606 GN=ANXA8L1 PE=2 SV=2	293	DLNLIKcHFKKMY
ylide_biotin	4	AFSCSSSFR	1	Q8N972	Zinc finger protein 709 OS=Homo sapiens OX=9606 GN=ZNF709 PE=2 SV=1	403	CGKAFScSSSFRM
ylide_biotin	4	AFSCSSSFR	1	Q8N972	Zinc finger protein 709 OS=Homo sapiens OX=9606 GN=ZNF709 PE=2 SV=1	459	CGKAFScSSSFRM
ylide_biotin	4	AFSCSSSFR	1	Q8N972	Zinc finger protein 709 OS=Homo sapiens OX=9606 GN=ZNF709 PE=2 SV=1	515	CGKAFScSSSFRM
ylide_biotin	10	VDCTAHSDVCSAQGVR	1	Q8NBS9	Thioredoxin domain-containing protein 5 OS=Homo sapiens OX=9606 GN=TXNDC5 PE=1 SV=2	128	TAHSDVcSAQGVR
ylide_biotin	7	KLCLNICVGESGDR	2	P62913	60S ribosomal protein L11 OS=Homo sapiens OX=9606 GN=RPL11 PE=1 SV=2	25	KLCLNIcVGESGD
ylide_biotin	5	IAVHCTVR	1	P62913	60S ribosomal protein L11 OS=Homo sapiens OX=9606 GN=RPL11 PE=1 SV=2	72	EKIAVHcTVRGAK
ylide_biotin	5	IRKLCLNICVGESGDR	1	P62913	60S ribosomal protein L11 OS=Homo sapiens OX=9606 GN=RPL11 PE=1 SV=2	21	LRIRKLcLNICVG
ylide_biotin	5	RRTGCIGAK	1	P62913	60S ribosomal protein L11 OS=Homo sapiens OX=9606 GN=RPL11 PE=1 SV=2	150	KKRRTGcIGAKHR
ylide_biotin	11	KITAFVPNDGCLNFIEENDEVLVAGFGR	1	P62266	40S ribosomal protein S23 OS=Homo sapiens OX=9606 GN=RPS23 PE=1 SV=3	90	FVPNDGcLNFIEE
ylide_biotin	4	MGKCRGLR	4	P62266	40S ribosomal protein S23 OS=Homo sapiens OX=9606 GN=RPS23 PE=1 SV=3	4	MGKcRGLRTA
ylide_biotin	9	GDTVSASPCSAPLAR	1	Q15477	Helicase SKI2W OS=Homo sapiens OX=9606 GN=SKIV2L PE=1 SV=3	247	TVSASPcSAPLAR
ylide_biotin	3	KRCLLAPR	5	A0A0U1RRE5	Negative regulator of P-body association OS=Homo sapiens OX=9606 GN=NBDY PE=1 SV=1	28	KPPKKRcLLAPRW
ylide_biotin	6	MGDQPCASGR	2	A0A0U1RRE5	Negative regulator of P-body association OS=Homo sapiens OX=9606 GN=NBDY PE=1 SV=1	6	MGDQPcASGRST
ylide_biotin	8	ALWFQGRCVK	7	P43243	Matrin-3 OS=Homo sapiens OX=9606 GN=MATR3 PE=1 SV=2	563	LWFQGRcVKVDLS
ylide_biotin	5	SDSLCRGR	1	Q8IWE5	Pleckstrin homology domain-containing family M member 2 OS=Homo sapiens OX=9606 GN=PLEKHM2 PE=1 SV=2	1009	QRSDSLcRGRASR
ylide_biotin	7	KDDYEYCMSEYLR	2	P53611	Geranylgeranyl transferase type-2 subunit beta OS=Homo sapiens OX=9606 GN=RABGGTB PE=1 SV=2	40	KDDYEYcMSEYLR
ylide_biotin	3	ELCELKPK	21	Q9UHD1	Cysteine and histidine-rich domain-containing protein 1 OS=Homo sapiens OX=9606 GN=CHORDC1 PE=1 SV=2	86	TEKKELcELKPKF
ylide_biotin	8	EPSQVIFCNRSPR	2	P40337	von Hippel-Lindau disease tumor suppressor OS=Homo sapiens OX=9606 GN=VHL PE=1 SV=2	77	PSQVIFcNRSPRV
ylide_biotin	12	MPQKDPCQKQACEIQK	2	P56277	Cx9C motif-containing protein 4 OS=Homo sapiens OX=9606 GN=CMC4 PE=1 SV=1	12	PCQKQAcEIQKCL
ylide_biotin	2	SCGSSTPDEFPTDIPGTK	1	P41091	Eukaryotic translation initiation factor 2 subunit 3 OS=Homo sapiens OX=9606 GN=EIF2S3 PE=1 SV=3	105	PECYRScGSSTPD
ylide_biotin	7	MADDQGCIEEQGVEDSANEDSVDAKPDR	1	P55210	Caspase-7 OS=Homo sapiens OX=9606 GN=CASP7 PE=1 SV=1	7	MADDQGcIEEQGV
ylide_biotin	13	SLENETLNKEEDCHSPTSKPPKPDQPLK	2	P23588	Eukaryotic translation initiation factor 4B OS=Homo sapiens OX=9606 GN=EIF4B PE=1 SV=2	457	LNKEEDcHSPTSK
ylide_biotin	5	FKVRCSR	8	P63173	60S ribosomal protein L38 OS=Homo sapiens OX=9606 GN=RPL38 PE=1 SV=2	38	VKFKVRcSRYLYT
ylide_biotin	5	KGVHCVMSLGVPGPATLAK	7	Q96CP2	FLYWCH family member 2 OS=Homo sapiens OX=9606 GN=FLYWCH2 PE=1 SV=1	64	KRKGVHcVMSLGV
ylide_biotin	28	QDPGTDRTEDSGLAAGPPEAAGENFAPCSVAPGK	10	Q96CP2	FLYWCH family member 2 OS=Homo sapiens OX=9606 GN=FLYWCH2 PE=1 SV=1	132	GENFAPcSVAPGK
ylide_biotin	8	IANNSYACKHPEVQSILK	2	O00141	Serine/threonine-protein kinase Sgk1 OS=Homo sapiens OX=9606 GN=SGK1 PE=1 SV=2	49	ANNSYAcKHPEVQ
ylide_biotin	5	GKPSCGLGSRPIK	1	Q9Y2G8	DnaJ homolog subfamily C member 16 OS=Homo sapiens OX=9606 GN=DNAJC16 PE=2 SV=3	744	SRGKPScGLGSRP
ylide_biotin	23	LTFSCLGGSDNFKHLNEIDLFHCIDPNDSK	2	Q15185	Prostaglandin E synthase 3 OS=Homo sapiens OX=9606 GN=PTGES3 PE=1 SV=1	58	EIDLFHcIDPNDS
ylide_biotin	5	SILCCLR	11	Q15185	Prostaglandin E synthase 3 OS=Homo sapiens OX=9606 GN=PTGES3 PE=1 SV=1	76	DRSILCcLRKGES
ylide_biotin	13	ENMKLPQPPEGQCYSN	1	Q13404	Ubiquitin-conjugating enzyme E2 variant 1 OS=Homo sapiens OX=9606 GN=UBE2V1 PE=1 SV=2	144	QPPEGQcYSN
ylide_biotin	5	FRYKCEGR	5	Q04864	Proto-oncogene c-Rel OS=Homo sapiens OX=9606 GN=REL PE=1 SV=1	27	MRFRYKcEGRSAG
ylide_biotin	5	LANTCFNEIEK	2	Q9NP61	ADP-ribosylation factor GTPase-activating protein 3 OS=Homo sapiens OX=9606 GN=ARFGAP3 PE=1 SV=1	241	QKLANTcFNEIEK
ylide_biotin	8	LGMGFGNCR	1	Q9NP61	ADP-ribosylation factor GTPase-activating protein 3 OS=Homo sapiens OX=9606 GN=ARFGAP3 PE=1 SV=1	312	GMGFGNcRSVISH
ylide_biotin	3	CVCGKNPAK	2	P07814	Bifunctional glutamate/proline--tRNA ligase OS=Homo sapiens OX=9606 GN=EPRS1 PE=1 SV=5	1497	PGAKCVcGKNPAK
ylide_biotin	5	DMKSCQFVAVR	1	P07814	Bifunctional glutamate/proline--tRNA ligase OS=Homo sapiens OX=9606 GN=EPRS1 PE=1 SV=5	1377	PRDMKScQFVAVR
ylide_biotin	11	ERPTPSLNNNCTTSEDSLVLYNR	5	P07814	Bifunctional glutamate/proline--tRNA ligase OS=Homo sapiens OX=9606 GN=EPRS1 PE=1 SV=5	744	PSLNNNcTTSEDS
ylide_biotin	17	GFFICDQPYEPVSPYSCKEAPCVLIYIPDGHTK	1	P07814	Bifunctional glutamate/proline--tRNA ligase OS=Homo sapiens OX=9606 GN=EPRS1 PE=1 SV=5	692	PVSPYScKEAPCV
ylide_biotin	7	INEAVECLLSLK	3	P07814	Bifunctional glutamate/proline--tRNA ligase OS=Homo sapiens OX=9606 GN=EPRS1 PE=1 SV=5	856	INEAVEcLLSLKA
ylide_biotin	5	LNQWCNVVR	1	P07814	Bifunctional glutamate/proline--tRNA ligase OS=Homo sapiens OX=9606 GN=EPRS1 PE=1 SV=5	1148	IKLNQWcNVVRWE
ylide_biotin	4	LSSCDSFTSTINELNHCLSLR	1	P07814	Bifunctional glutamate/proline--tRNA ligase OS=Homo sapiens OX=9606 GN=EPRS1 PE=1 SV=5	92	ATKLSScDSFTST
ylide_biotin	12	IVQIPFCGEIDCEDWIKK	1	P07814	Bifunctional glutamate/proline--tRNA ligase OS=Homo sapiens OX=9606 GN=EPRS1 PE=1 SV=5	1453	FCGEIDcEDWIKK
ylide_biotin	10	SLCIPFKPLCELQPGAK	4	P07814	Bifunctional glutamate/proline--tRNA ligase OS=Homo sapiens OX=9606 GN=EPRS1 PE=1 SV=5	1487	IPFKPLcELQPGA
ylide_biotin	17	NMGLSPPASSTSTSSTCRAEAPR	1	Q9HC52	Chromobox protein homolog 8 OS=Homo sapiens OX=9606 GN=CBX8 PE=1 SV=3	142	TSTSSTcRAEAPR
ylide_biotin	9	RQDSDLVQCGVTSPSSAEATGK	3	Q9HC52	Chromobox protein homolog 8 OS=Homo sapiens OX=9606 GN=CBX8 PE=1 SV=3	261	DSDLVQcGVTSPS
ylide_biotin	4	YRPCSLGR	2	P40938	Replication factor C subunit 3 OS=Homo sapiens OX=9606 GN=RFC3 PE=1 SV=2	11	VDKYRPcSLGRLD
ylide_biotin	4	SKDCAYKWLYDETLEDR	1	Q9H5Q4	Dimethyladenosine transferase 2, mitochondrial OS=Homo sapiens OX=9606 GN=TFB2M PE=1 SV=1	383	IERSKDcAYKWLY
ylide_biotin	8	EPGKVFVCDAYLQR	1	Q5EBL2	Zinc finger protein 628 OS=Homo sapiens OX=9606 GN=ZNF628 PE=1 SV=3	252	PGKVFVcDAYLQR
ylide_biotin	6	QRGVSCFRTPFGPLSSR	1	P85037	Forkhead box protein K1 OS=Homo sapiens OX=9606 GN=FOXK1 PE=1 SV=1	404	RQRGVScFRTPFG
ylide_biotin	9	SGGLQTPECLSR	3	P85037	Forkhead box protein K1 OS=Homo sapiens OX=9606 GN=FOXK1 PE=1 SV=1	439	GLQTPEcLSREGS
ylide_biotin	5	NSNYCLPSYTAYK	2	Q9Y4E8	Ubiquitin carboxyl-terminal hydrolase 15 OS=Homo sapiens OX=9606 GN=USP15 PE=1 SV=3	264	VKNSNYcLPSYTA
ylide_biotin	10	GRPGLCTPQCASLEPGPPAPSR	1	Q2T9J0	Peroxisomal leader peptide-processing protease OS=Homo sapiens OX=9606 GN=TYSND1 PE=1 SV=3	110	GLCTPQcASLEPG
ylide_biotin	16	SGEEDFESLASQFSDCSSAK	1	Q13526	Peptidyl-prolyl cis-trans isomerase NIMA-interacting 1 OS=Homo sapiens OX=9606 GN=PIN1 PE=1 SV=1	113	ASQFSDcSSAKAR
ylide_biotin	4	TQACLASK	2	Q15361	Transcription termination factor 1 OS=Homo sapiens OX=9606 GN=TTF1 PE=1 SV=3	445	QKKTQAcLASKHV
ylide_biotin	7	AGVVIHCNHR	1	Q9H8P0	Polyprenol reductase OS=Homo sapiens OX=9606 GN=SRD5A3 PE=1 SV=1	238	AGVVIHcNHRIPF
ylide_biotin	8	VLGLGLGCLRLTEADYLSSHLTEGPHR	1	Q9BRJ7	Tudor-interacting repair regulator protein OS=Homo sapiens OX=9606 GN=NUDT16L1 PE=1 SV=1	88	LGLGLGcLRLTEA
ylide_biotin	8	TSAVPSPCGK	11	P49748	Very long-chain specific acyl-CoA dehydrogenase, mitochondrial OS=Homo sapiens OX=9606 GN=ACADVL PE=1 SV=1	237	SAVPSPcGKYYTL
ylide_biotin	3	SYCPHSTR	5	Q86VQ6	Thioredoxin reductase 3 OS=Homo sapiens OX=9606 GN=TXNRD3 PE=1 SV=4	76	IFSKSYcPHSTRV
ylide_biotin	7	LLIDPNCSGHSPR	1	Q8WYQ5	Microprocessor complex subunit DGCR8 OS=Homo sapiens OX=9606 GN=DGCR8 PE=1 SV=1	91	LLIDPNcSGHSPR
ylide_biotin	8	IIGATDSCGDLMFLMK	2	P45973	Chromobox protein homolog 5 OS=Homo sapiens OX=9606 GN=CBX5 PE=1 SV=1	133	IGATDScGDLMFL
ylide_biotin	2	ACQSLASR	1	Q12789	General transcription factor 3C polypeptide 1 OS=Homo sapiens OX=9606 GN=GTF3C1 PE=1 SV=4	544	AAEERAcQSLASR
ylide_biotin	7	NNQESDCVSK	13	A6NDG6	Glycerol-3-phosphate phosphatase OS=Homo sapiens OX=9606 GN=PGP PE=1 SV=1	297	NNQESDcVSKKKM
ylide_biotin	8	KNEPPLTCPYSLK	1	Q9UGP8	Translocation protein SEC63 homolog OS=Homo sapiens OX=9606 GN=SEC63 PE=1 SV=2	295	NEPPLTcPYSLKA
ylide_biotin	7	RLVNSQCEFER	1	Q9NPI1	Bromodomain-containing protein 7 OS=Homo sapiens OX=9606 GN=BRD7 PE=1 SV=1	338	RLVNSQcEFERRK
ylide_biotin	5	YVLHCQGTEEEK	1	P62495	Eukaryotic peptide chain release factor subunit 1 OS=Homo sapiens OX=9606 GN=ETF1 PE=1 SV=3	335	MRYVLHcQGTEEE
ylide_biotin	7	EQGDRICRLEEQLGR	2	Q9BR76	Coronin-1B OS=Homo sapiens OX=9606 GN=CORO1B PE=1 SV=1	475	EQGDRIcRLEEQL
ylide_biotin	3	SMCAGQR	3	Q6NZ67	Mitotic-spindle organizing protein 2B OS=Homo sapiens OX=9606 GN=MZT2B PE=1 SV=1	80	QMLKSMcAGQRLA
ylide_biotin	5	NVNQCLGPGK	1	P98155	Very low-density lipoprotein receptor OS=Homo sapiens OX=9606 GN=VLDLR PE=1 SV=1	318	CKNVNQcLGPGKF
ylide_biotin	8	MAHAPARCPSAR	7	O60547	GDP-mannose 4,6 dehydratase OS=Homo sapiens OX=9606 GN=GMDS PE=1 SV=1	8	AHAPARcPSARGS
ylide_biotin	14	VQPQWSPPAGTQPCRLHLYNSLTR	1	P49589	Cysteine--tRNA ligase, cytoplasmic OS=Homo sapiens OX=9606 GN=CARS1 PE=1 SV=3	27	PAGTQPcRLHLYN
ylide_biotin	8	MPTESASCSTAR	2	Q9Y2I8	WD repeat-containing protein 37 OS=Homo sapiens OX=9606 GN=WDR37 PE=1 SV=2	8	PTESAScSTARQT
ylide_biotin	4	AATCFAEKLPSSNLLK	1	O95210	Starch-binding domain-containing protein 1 OS=Homo sapiens OX=9606 GN=STBD1 PE=1 SV=1	168	SAKAATcFAEKLP
ylide_biotin	6	VNDASCGPSGCYTYQVSR	1	Q9HBE1	POZ-, AT hook-, and zinc finger-containing protein 1 OS=Homo sapiens OX=9606 GN=PATZ1 PE=1 SV=1	9	RVNDAScGPSGCY
ylide_biotin	6	LVAAKCTLAAR	1	Q8WWY3	U4/U6 small nuclear ribonucleoprotein Prp31 OS=Homo sapiens OX=9606 GN=PRPF31 PE=1 SV=2	299	RLVAAKcTLAARV
ylide_biotin	4	CSGCHSYQESTK	1	Q9UPT9	Ubiquitin carboxyl-terminal hydrolase 22 OS=Homo sapiens OX=9606 GN=USP22 PE=1 SV=2	386	KIKCSGcHSYQES
ylide_biotin	6	KITSNCTIGLR	3	Q9UPT9	Ubiquitin carboxyl-terminal hydrolase 22 OS=Homo sapiens OX=9606 GN=USP22 PE=1 SV=2	171	RKITSNcTIGLRG
ylide_biotin	5	ACPECREPFPDGAELRR	1	Q6PJ69	Tripartite motif-containing protein 65 OS=Homo sapiens OX=9606 GN=TRIM65 PE=1 SV=3	50	GKACPEcREPFPD
ylide_biotin	5	TEGRCVCSVCTVR	1	Q6PJ69	Tripartite motif-containing protein 65 OS=Homo sapiens OX=9606 GN=TRIM65 PE=1 SV=3	112	CRTEGRcVCSVCT
ylide_biotin	5	AERVCLCEACAAQEHR	1	Q96LD4	E3 ubiquitin-protein ligase TRIM47 OS=Homo sapiens OX=9606 GN=TRIM47 PE=1 SV=2	199	CRAERVcLCEACA
ylide_biotin	4	CPLCQEPFPDGLQLR	1	Q96LD4	E3 ubiquitin-protein ligase TRIM47 OS=Homo sapiens OX=9606 GN=TRIM47 PE=1 SV=2	57	AARCPLcQEPFPD
ylide_biotin	3	KSCISVLK	1	Q96LD4	E3 ubiquitin-protein ligase TRIM47 OS=Homo sapiens OX=9606 GN=TRIM47 PE=1 SV=2	631	GPLKKScISVLKR
ylide_biotin	4	RVLCPINYPLSPTR	1	Q96LD4	E3 ubiquitin-protein ligase TRIM47 OS=Homo sapiens OX=9606 GN=TRIM47 PE=1 SV=2	454	GVKRVLcPINYPL
ylide_biotin	7	VCLCEACAAQEHR	3	Q96LD4	E3 ubiquitin-protein ligase TRIM47 OS=Homo sapiens OX=9606 GN=TRIM47 PE=1 SV=2	204	VCLCEAcAAQEHR
ylide_biotin	4	APCCGADVK	2	Q12933	TNF receptor-associated factor 2 OS=Homo sapiens OX=9606 GN=TRAF2 PE=1 SV=2	171	HCRAPCcGADVKA
ylide_biotin	9	GTLKEYESCHEGRCPLMLTECPACK	1	Q12933	TNF receptor-associated factor 2 OS=Homo sapiens OX=9606 GN=TRAF2 PE=1 SV=2	124	LKEYEScHEGRCP
ylide_biotin	6	HCRAPCCGADVK	1	Q12933	TNF receptor-associated factor 2 OS=Homo sapiens OX=9606 GN=TRAF2 PE=1 SV=2	170	RHCRAPcCGADVK
ylide_biotin	6	HLEHECPER	5	Q12933	TNF receptor-associated factor 2 OS=Homo sapiens OX=9606 GN=TRAF2 PE=1 SV=2	156	RHLEHEcPERSLS
ylide_biotin	9	TATFENIVCVLNREVER	3	Q12933	TNF receptor-associated factor 2 OS=Homo sapiens OX=9606 GN=TRAF2 PE=1 SV=2	287	TFENIVcVLNREV
ylide_biotin	6	YLCSACRNVLR	1	Q12933	TNF receptor-associated factor 2 OS=Homo sapiens OX=9606 GN=TRAF2 PE=1 SV=2	37	KYLCSAcRNVLRR
ylide_biotin	6	SSSLTCHQR	1	Q96K58	Zinc finger protein 668 OS=Homo sapiens OX=9606 GN=ZNF668 PE=1 SV=3	241	RSSSLTcHQRIHA
ylide_biotin	9	NYLEPGKECVQPATK	2	P16615	Sarcoplasmic/endoplasmic reticulum calcium ATPase 2 OS=Homo sapiens OX=9606 GN=ATP2A2 PE=1 SV=1	997	LEPGKEcVQPATK
ylide_biotin	8	ENCMYQACPTQDCNKK	1	P27694	Replication protein A 70 kDa DNA-binding subunit OS=Homo sapiens OX=9606 GN=RPA1 PE=1 SV=2	481	NCMYQAcPTQDCN
ylide_biotin	4	WTICAR	1	P27694	Replication protein A 70 kDa DNA-binding subunit OS=Homo sapiens OX=9606 GN=RPA1 PE=1 SV=2	200	QSKWTIcARVTNK
ylide_biotin	7	IGIVGFCWGGTAVHHLMMK	1	Q96DG6	Carboxymethylenebutenolidase homolog OS=Homo sapiens OX=9606 GN=CMBL PE=1 SV=1	132	IGIVGFcWGGTAV
ylide_biotin	6	AVQDLCGWR	2	Q9P258	Protein RCC2 OS=Homo sapiens OX=9606 GN=RCC2 PE=1 SV=2	428	KAVQDLcGWRIRS
ylide_biotin	14	NLGQNLWGPHRYGCLAGVR	1	Q9P258	Protein RCC2 OS=Homo sapiens OX=9606 GN=RCC2 PE=1 SV=2	144	GPHRYGcLAGVRV
ylide_biotin	12	GISSDNESVASCNSVK	1	Q8IVL1	Neuron navigator 2 OS=Homo sapiens OX=9606 GN=NAV2 PE=1 SV=3	1288	NESVAScNSVKVN
ylide_biotin	19	IDEPSTPYHSMMGDDEDACSDTEATEAMAPDILAR	2	P41236	Protein phosphatase inhibitor 2 OS=Homo sapiens OX=9606 GN=PPP1R2 PE=1 SV=2	86	GDDEDAcSDTEAT
ylide_biotin	6	NIEKECNAK	1	Q15637	Splicing factor 1 OS=Homo sapiens OX=9606 GN=SF1 PE=1 SV=4	171	KNIEKEcNAKIMI
ylide_biotin	8	SITNTTVCTK	3	Q15637	Splicing factor 1 OS=Homo sapiens OX=9606 GN=SF1 PE=1 SV=4	279	ITNTTVcTKCGGA
ylide_biotin	7	THMSGSCTQDR	1	Q9NUD5	Zinc finger CCHC domain-containing protein 3 OS=Homo sapiens OX=9606 GN=ZCCHC3 PE=1 SV=2	348	THMSGScTQDRCF
ylide_biotin	6	IGRNECVVVIR	1	P05198	Eukaryotic translation initiation factor 2 subunit 1 OS=Homo sapiens OX=9606 GN=EIF2S1 PE=1 SV=3	70	RIGRNEcVVVIRV
ylide_biotin	8	VVLLGEGCVGK	4	Q9UL25	Ras-related protein Rab-21 OS=Homo sapiens OX=9606 GN=RAB21 PE=1 SV=3	29	VLLGEGcVGKTSL
ylide_biotin	5	SSKCCCIYEKPR	2	O60927	E3 ubiquitin-protein ligase PPP1R11 OS=Homo sapiens OX=9606 GN=PPP1R11 PE=1 SV=1	61	RRSSKCcCIYEKP
ylide_biotin	17	IWGPAPFIDHQNIEEECSSMDS	1	Q9H7D7	WD repeat-containing protein 26 OS=Homo sapiens OX=9606 GN=WDR26 PE=1 SV=3	656	QNIEEEcSSMDS
ylide_biotin	3	AVCMLSNTTAIAEAWAR	2	Q9NY65	Tubulin alpha-8 chain OS=Homo sapiens OX=9606 GN=TUBA8 PE=1 SV=1	376	KVQRAVcMLSNTT
ylide_biotin	15	AYHEQLSVAEITSSCFEPNSQMVK	1	Q9NY65	Tubulin alpha-8 chain OS=Homo sapiens OX=9606 GN=TUBA8 PE=1 SV=1	295	AEITSScFEPNSQ
ylide_biotin	9	RTIQFVDWCPTGFK	1	Q9NY65	Tubulin alpha-8 chain OS=Homo sapiens OX=9606 GN=TUBA8 PE=1 SV=1	347	IQFVDWcPTGFKV
ylide_biotin	17	EDQKQNEPFVATQSSACVDGPANH	1	O00180	Potassium channel subfamily K member 1 OS=Homo sapiens OX=9606 GN=KCNK1 PE=1 SV=1	329	ATQSSAcVDGPAN
ylide_biotin	4	MSYCRQEGKDR	1	Q8N4Q1	Mitochondrial intermembrane space import and assembly protein 40 OS=Homo sapiens OX=9606 GN=CHCHD4 PE=1 SV=1	4	MSYcRQEGKD
ylide_biotin	3	LLCEHFR	1	Q13155	Aminoacyl tRNA synthase complex-interacting multifunctional protein 2 OS=Homo sapiens OX=9606 GN=AIMP2 PE=1 SV=2	143	VLHRLLcEHFRVL
ylide_biotin	6	VELPTCMYRLPNVHGR	2	Q13155	Aminoacyl tRNA synthase complex-interacting multifunctional protein 2 OS=Homo sapiens OX=9606 GN=AIMP2 PE=1 SV=2	23	RVELPTcMYRLPN
ylide_biotin	5	HVTSCTKSYEAAK	1	O43298	Zinc finger and BTB domain-containing protein 43 OS=Homo sapiens OX=9606 GN=ZBTB43 PE=1 SV=1	450	HRHVTScTKSYEA
ylide_biotin	6	LFQECCPHSTDR	1	P61978	Heterogeneous nuclear ribonucleoprotein K OS=Homo sapiens OX=9606 GN=HNRNPK PE=1 SV=1	185	KLFQECcPHSTDR
ylide_biotin	29	IIPTLEEGLQLPSPTATSQLPLESDAVECLNYQHYK	1	P61978	Heterogeneous nuclear ribonucleoprotein K OS=Homo sapiens OX=9606 GN=HNRNPK PE=1 SV=1	132	ESDAVEcLNYQHY
ylide_biotin	5	APIPCEVVK	1	Q68CP9	AT-rich interactive domain-containing protein 2 OS=Homo sapiens OX=9606 GN=ARID2 PE=1 SV=2	711	SKAPIPcEVVKAT
ylide_biotin	9	IYERPSTTCSKPQR	3	Q9BVA0	Katanin p80 WD40 repeat-containing subunit B1 OS=Homo sapiens OX=9606 GN=KATNB1 PE=1 SV=1	344	ERPSTTcSKPQRV
ylide_biotin	14	VDSPSHGLVTSSLCIPSPAR	4	Q9UER7	Death domain-associated protein 6 OS=Homo sapiens OX=9606 GN=DAXX PE=1 SV=2	699	LVTSSLcIPSPAR
ylide_biotin	13	AGDELAYNSSSACASSR	1	Q86Y37	CDK2-associated and cullin domain-containing protein 1 OS=Homo sapiens OX=9606 GN=CACUL1 PE=1 SV=1	362	YNSSSAcASSRGY
ylide_biotin	23	MAAEEPQQQKQEPLGSDSEGVNCLAYDEAIMAQQDR	2	Q96FW1	Ubiquitin thioesterase OTUB1 OS=Homo sapiens OX=9606 GN=OTUB1 PE=1 SV=2	23	DSEGVNcLAYDEA
ylide_biotin	4	ALDCSSSIR	2	O94776	Metastasis-associated protein MTA2 OS=Homo sapiens OX=9606 GN=MTA2 PE=1 SV=1	209	FARALDcSSSIRQ
ylide_biotin	5	DSKQCSENVHIST	1	P53609	Geranylgeranyl transferase type-1 subunit beta OS=Homo sapiens OX=9606 GN=PGGT1B PE=1 SV=2	369	TKDSKQcSENVHI
ylide_biotin	3	MACGATLKR	1	Q53H80	Akirin-2 OS=Homo sapiens OX=9606 GN=AKIRIN2 PE=1 SV=2	3	MAcGATLKR
ylide_biotin	5	MEKTCIDALPLTMNSSEK	3	Q687X5	Metalloreductase STEAP4 OS=Homo sapiens OX=9606 GN=STEAP4 PE=1 SV=1	5	MEKTcIDALPL
ylide_biotin	18	SKDYEFMWNPHLGYILTCPSNLGTGLR	1	P12277	Creatine kinase B-type OS=Homo sapiens OX=9606 GN=CKB PE=1 SV=1	283	LGYILTcPSNLGT
ylide_biotin	4	NQPCYRK	1	Q99661	Kinesin-like protein KIF2C OS=Homo sapiens OX=9606 GN=KIF2C PE=1 SV=2	389	LLKNQPcYRKLGL
ylide_biotin	4	EKECGVTAAFDASR	2	Q9Y6R0	Numb-like protein OS=Homo sapiens OX=9606 GN=NUMBL PE=1 SV=1	206	QRREKEcGVTAAF
ylide_biotin	3	SGCSEAQPPESPETR	1	Q9Y6A5	Transforming acidic coiled-coil-containing protein 3 OS=Homo sapiens OX=9606 GN=TACC3 PE=1 SV=1	426	GDTKSGcSEAQPP
ylide_biotin	5	YYRVCTLAIIDPGDSDIIR	1	P62888	60S ribosomal protein L30 OS=Homo sapiens OX=9606 GN=RPL30 PE=1 SV=2	92	GKYYRVcTLAIID
ylide_biotin	5	ISSDCFSEKR	1	Q96NU1	Sterile alpha motif domain-containing protein 11 OS=Homo sapiens OX=9606 GN=SAMD11 PE=1 SV=3	161	PRISSDcFSEKRA
ylide_biotin	4	QSPCHSPR	1	Q12968	Nuclear factor of activated T-cells, cytoplasmic 3 OS=Homo sapiens OX=9606 GN=NFATC3 PE=1 SV=1	242	SPRQSPcHSPRSS
ylide_biotin	3	DHCVAHK	1	P07919	Cytochrome b-c1 complex subunit 6, mitochondrial OS=Homo sapiens OX=9606 GN=UQCRH PE=1 SV=2	81	LHARDHcVAHKLF
ylide_biotin	9	EQCEQLEKCVKAR	1	P07919	Cytochrome b-c1 complex subunit 6, mitochondrial OS=Homo sapiens OX=9606 GN=UQCRH PE=1 SV=2	43	CEQLEKcVKARER
ylide_biotin	6	ERLELCDERVSSR	1	P07919	Cytochrome b-c1 complex subunit 6, mitochondrial OS=Homo sapiens OX=9606 GN=UQCRH PE=1 SV=2	53	RERLELcDERVSS
ylide_biotin	7	SHTEEDCTEELFDFLHAR	1	P07919	Cytochrome b-c1 complex subunit 6, mitochondrial OS=Homo sapiens OX=9606 GN=UQCRH PE=1 SV=2	67	SHTEEDcTEELFD
ylide_biotin	9	SADLQTNGCVTTARPVPK	1	Q9HBK9	Arsenite methyltransferase OS=Homo sapiens OX=9606 GN=AS3MT PE=1 SV=3	32	DLQTNGcVTTARP
ylide_biotin	7	QGISKTCMSEETSNQK	1	Q14119	Vascular endothelial zinc finger 1 OS=Homo sapiens OX=9606 GN=VEZF1 PE=1 SV=2	327	QGISKTcMSEETS
ylide_biotin	10	THGQSQSINCNTCK	1	Q14119	Vascular endothelial zinc finger 1 OS=Homo sapiens OX=9606 GN=VEZF1 PE=1 SV=2	316	QSQSINcNTCKQG
ylide_biotin	10	AHQETFPSLCQLGK	1	P13631	Retinoic acid receptor gamma OS=Homo sapiens OX=9606 GN=RARG PE=1 SV=1	205	ETFPSLcQLGKYT
ylide_biotin	6	FASGGCDNLIK	1	P55735	Protein SEC13 homolog OS=Homo sapiens OX=9606 GN=SEC13 PE=1 SV=3	187	RFASGGcDNLIKL
ylide_biotin	4	LATCSSDR	2	P55735	Protein SEC13 homolog OS=Homo sapiens OX=9606 GN=SEC13 PE=1 SV=3	31	GTRLATcSSDRSV
ylide_biotin	6	EQSQPCADNAVLSSGLTAAR	4	P19784	Casein kinase II subunit alpha' OS=Homo sapiens OX=9606 GN=CSNK2A2 PE=1 SV=1	336	KEQSQPcADNAVL
ylide_biotin	11	RFGDDLNHISCVIKER	1	Q8IXM2	Chromatin complexes subunit BAP18 OS=Homo sapiens OX=9606 GN=BAP18 PE=1 SV=1	66	DLNHIScVIKERT
ylide_biotin	3	ASCPAAAPLMER	2	Q96CD2	Phosphopantothenoylcysteine decarboxylase OS=Homo sapiens OX=9606 GN=PPCDC PE=1 SV=2	7	MEPKAScPAAAPL
ylide_biotin	4	KLVCGDEGLGAMAEVGTIVDK	1	Q96CD2	Phosphopantothenoylcysteine decarboxylase OS=Homo sapiens OX=9606 GN=PPCDC PE=1 SV=2	173	VAKKLVcGDEGLG
ylide_biotin	22	STPGSGSGPAHGPDPAHGPASCS	1	Q9ULX9	Transcription factor MafF OS=Homo sapiens OX=9606 GN=MAFF PE=1 SV=2	163	AHGPAScS
ylide_biotin	7	IQHNGNCQLNEENLSTK	3	Q8WXA9	Splicing regulatory glutamine/lysine-rich protein 1 OS=Homo sapiens OX=9606 GN=SREK1 PE=1 SV=1	494	IQHNGNcQLNEEN
ylide_biotin	3	HKCIENVSR	4	Q96PM5	RING finger and CHY zinc finger domain-containing protein 1 OS=Homo sapiens OX=9606 GN=RCHY1 PE=1 SV=1	136	LQGRHKcIENVSR
ylide_biotin	8	DVTLQKQCVPFR	17	P18621	60S ribosomal protein L17 OS=Homo sapiens OX=9606 GN=RPL17 PE=1 SV=3	57	VTLQKQcVPFRRY
ylide_biotin	9	INPYMSSPCHIEMILTEK	6	P18621	60S ribosomal protein L17 OS=Homo sapiens OX=9606 GN=RPL17 PE=1 SV=3	144	PYMSSPcHIEMIL
ylide_biotin	15	MVRYSLDPENPTKSCK	2	P18621	60S ribosomal protein L17 OS=Homo sapiens OX=9606 GN=RPL17 PE=1 SV=3	15	ENPTKScKSRGSN
ylide_biotin	9	RYNGGVGRCAQAK	13	P18621	60S ribosomal protein L17 OS=Homo sapiens OX=9606 GN=RPL17 PE=1 SV=3	70	NGGVGRcAQAKQW
ylide_biotin	5	NKYECELQGAK	2	Q9HCU9	Breast cancer metastasis-suppressor 1 OS=Homo sapiens OX=9606 GN=BRMS1 PE=1 SV=1	136	IRNKYEcELQGAK
ylide_biotin	9	APPPSLTDCIGTVDSR	10	Q9NZZ3	Charged multivesicular body protein 5 OS=Homo sapiens OX=9606 GN=CHMP5 PE=1 SV=1	20	PPSLTDcIGTVDS
ylide_biotin	8	QVSSSAACHSR	4	Q9NVM4	Protein arginine N-methyltransferase 7 OS=Homo sapiens OX=9606 GN=PRMT7 PE=1 SV=1	262	VSSSAAcHSRRFE
ylide_biotin	9	AFGGPGAGCISEGR	3	Q9H479	Fructosamine-3-kinase OS=Homo sapiens OX=9606 GN=FN3K PE=1 SV=1	24	GGPGAGcISEGRA
ylide_biotin	7	FLTFKDCDPGEVNK	3	Q9NYK5	39S ribosomal protein L39, mitochondrial OS=Homo sapiens OX=9606 GN=MRPL39 PE=1 SV=3	133	FLTFKDcDPGEVN
[truncated: 1,248 more rows]
